# Supplementary material for: Clinical and biological determinants of P-wave duration: cross-sectional data from the population-based CoLaus|PsyCoLaus study
Source: PubMed Central journal article supplement — BMJ Open. 2020 Nov 19;10(11):e038828. doi: 10.1136/bmjopen-2020-038828 (PMC7678386; doi:10.1136/bmjopen-2020-038828), 2020-11-19
Supplement: bmjopen-2020-038828.draft_revisions.pdf [file bmjopen-2020-038828.draft_revisions.pdf]

# BMJ Open

BMJ Open is committed to open peer review. As part of this commitment we make the peer review history of every article we publish publicly available.

When an article is published we post the peer reviewers' comments and the authors' responses online. We also post the versions of the paper that were used during peer review. These are the versions that the peer review comments apply to.

The versions of the paper that follow are the versions that were submitted during the peer review process. They are not the versions of record or the final published versions. They should not be cited or distributed as the published version of this manuscript.

BMJ Open is an open access journal and the full, final, typeset and author-corrected version of record of the manuscript is available on our site with no access controls, subscription charges or pay-per-view fees (<http://bmjopen.bmj.com>).

If you have any questions on BMJ Open's open peer review process please email [info.bmjopen@bmj.com](mailto:info.bmjopen@bmj.com)

# BMJ Open

**Clinical and biological determinants of P-wave duration:  
Cross-sectional data from the population-based  
CoLaus/PsyColaus-study.**

|                               |                                                                                                                                                                                                                                                                       |
|-------------------------------|-----------------------------------------------------------------------------------------------------------------------------------------------------------------------------------------------------------------------------------------------------------------------|
| Journal:                      | <i>BMJ Open</i>                                                                                                                                                                                                                                                       |
| Manuscript ID                 | bmjopen-2020-038828                                                                                                                                                                                                                                                   |
| Article Type:                 | Original research                                                                                                                                                                                                                                                     |
| Date Submitted by the Author: | 27-Mar-2020                                                                                                                                                                                                                                                           |
| Complete List of Authors:     | Bocchi, Federica; CHUV, Internal medicine<br>Marques-Vidal, Pedro; CHUV, Internal Medicine<br>Pruvot, Etienne; CHUV, Cardiology<br>Waeber, Gerard; CHUV, Internal Medicine<br>Vollenweider, Peter; CHUV, Internal Medicine<br>Gachoud, David; CHUV, Internal Medicine |
| Keywords:                     | EPIDEMIOLOGY, Adult cardiology < CARDIOLOGY, Cardiac Epidemiology < CARDIOLOGY, Cardiology < INTERNAL MEDICINE                                                                                                                                                        |
|                               |                                                                                                                                                                                                                                                                       |

SCHOLARONE™  
Manuscripts

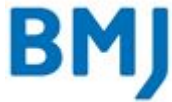

I, the Submitting Author has the right to grant and does grant on behalf of all authors of the Work (as defined in the below author licence), an exclusive licence and/or a non-exclusive licence for contributions from authors who are: i) UK Crown employees; ii) where BMJ has agreed a CC-BY licence shall apply, and/or iii) in accordance with the terms applicable for US Federal Government officers or employees acting as part of their official duties; on a worldwide, perpetual, irrevocable, royalty-free basis to BMJ Publishing Group Ltd ("BMJ") its licensees and where the relevant Journal is co-owned by BMJ to the co-owners of the Journal, to publish the Work in this journal and any other BMJ products and to exploit all rights, as set out in our [licence](#).

The Submitting Author accepts and understands that any supply made under these terms is made by BMJ to the Submitting Author unless you are acting as an employee on behalf of your employer or a postgraduate student of an affiliated institution which is paying any applicable article publishing charge ("APC") for Open Access articles. Where the Submitting Author wishes to make the Work available on an Open Access basis (and intends to pay the relevant APC), the terms of reuse of such Open Access shall be governed by a Creative Commons licence – details of these licences and which [Creative Commons](#) licence will apply to this Work are set out in our licence referred to above.

Other than as permitted in any relevant BMJ Author's Self Archiving Policies, I confirm this Work has not been accepted for publication elsewhere, is not being considered for publication elsewhere and does not duplicate material already published. I confirm all authors consent to publication of this Work and authorise the granting of this licence.

1  
2  
3 **Clinical and biological determinants of P-wave duration: Cross-sectional data**  
4  
5  
6 **from the population-based CoLaus/PsyColaus-study**  
7

8 *Federica Bocchi<sup>1</sup>, Pedro Marques-Vidal<sup>1</sup>, Etienne Pruvot<sup>2</sup>, Gérard Waeber<sup>1</sup>, Peter Vollenweider<sup>1</sup>, David*  
9 *Gachoud<sup>1</sup>*  
10

11  
12  
13 <sup>1</sup>*Department of Internal Medicine, Lausanne University Hospital (CHUV) and University of Lausanne,*  
14 *Lausanne, Switzerland.*  
15

16  
17 <sup>2</sup>*Department of Cardiology, Lausanne University Hospital (CHUV) and University of Lausanne,*  
18 *Lausanne, Switzerland.*  
19

20  
21  
22  
23  
24 **Author's emails**  
25

26 Federica Bocchi federica.bocchi@ticino.com  
27  
28 Pedro Marques-Vidal Pedro-Manuel.Marques-Vidal@chuv.ch  
29  
30 Etienne Pruvot Etienne.Pruvot@chuv.ch  
31  
32 Gérard Waeber Gerard.Waeber@chuv.ch  
33  
34 Peter Vollenweider Peter.Vollenweider@chuv.ch  
35  
36 David Gachoud David.Gachoud@chuv.ch  
37  
38  
39  
40  
41

42 **Address for corresponding author:**  
43

44 Federica Bocchi  
45  
46 Lausanne University Hospital  
47  
48 Rue du Bugnon 46  
49  
50 1011 Lausanne, Switzerland  
51  
52 Phone: +41 76 679 54 86  
53  
54 Email: federica.bocchi@ticino.com  
55  
56  
57  
58  
59

60 **Word count:** 2575

**ABSTRACT**

**Objectives:** P-wave duration (PWD) is associated with the development of atrial arrhythmias, cardiovascular (CV) and all-cause mortality. With this study, we aimed to assess the distribution and determinants of PWD in the general population.

**Design:** Cross-sectional study using data collected between 2014 and 2016.

**Setting:** In the population-based cohort CoLaus/PsyColaus, Lausanne, Switzerland, we used 12-lead electrocardiograms (ECGs) to measure PWD. Potential demographic, clinical and biological determinants of PWD were collected by questionnaire, anthropometry, blood pressure measurement and biological assays.

**Participants:** Data from 3459 participants (55% women, 62±10 years, 93% Caucasian) were included. Participants were excluded if they presented 1) atrial fibrillation/atrial flutter on the study ECG or Wolf-Parkinson-White ECG pattern; 2) missing or non-interpretable ECG and 3) missing phenotypic data.

**Primary outcome measure:** Determine 1) the PWD distribution and 2) the demographic, clinical and biological determinants of PWD in a large population-based cohort.

**Results:** Median and interquartile range of PWD was 112 [102-120] ms. In the multivariable analyses, PWD was significantly associated with age ( $p<0.001$ ) and height ( $p<0.001$ ), with an adjusted regression coefficient (95% CI) of 0.29 ms/y (0.22-0.36) and 0.31 ms/cm (0.27-0.36), respectively. PWD, given thereafter in ms with adjusted mean  $\pm$  standard error, was significantly ( $p<0.05$ ) associated with (a) gender (woman 110.0±0.4; man 112.1±0.4), (b) BMI (normal 110.1±0.4; overweight 110.9±0.4; obese 112.9±0.5), (c) abdominal obesity (no 110.5±0.3; yes 111.7±0.4), (d) hypertension (no 110.4±0.3; yes 111.6±0.4) and (e) use of antiarrhythmic medications (no 110.7±0.2; yes 113.0±0.8).

**Conclusion:** PWD is positively associated with age, height, male gender, obesity markers, hypertension and antiarrhythmic medications. Clinical interpretation of PWD should take these factors into consideration.

**Keywords:** Epidemiology; cross-sectional; P-wave duration; obesity; risk factors.

## STRENGTHS AND LIMITATIONS OF THIS STUDY

- This study evaluated the association between P-wave duration (PWD) and demographic, clinical or biological variables in a general population setting.
- A large number of covariates possibly associated with the PWD were analyzed.
- The study was conducted in a population-based sample allowing for the generalization of the results to similar Caucasian populations.
- Not having a published consensus about the measurement of PWD represents a limit of this study.

## INTRODUCTION

P-wave duration (PWD) has received increasing attention during the past decades because of its association with the development of atrial arrhythmias (e.g. atrial fibrillation and flutter),(1) as well as cardiovascular (CV) and all-cause mortality.(2) A prolonged PWD may reflect the presence of structural cardiac abnormalities (atrial inflammation, fibrosis), which lead to impairment in conduction.(2) Therefore, PWD measured on a baseline electrocardiogram (ECG), a non-invasive and easily obtained tool, can be considered as a marker of structural changes affecting the atrial tissue.(3)

Many studies associated PWD with aging(3–5) and male gender.(3) Moreover, hypertension and obesity cause left ventricular hypertrophy, subsequent ventricular diastolic dysfunction and atrial enlargement, and have been linked to prolonged PWD.(2, 6) Finally, diabetes is also associated with atrial structural changes, such as fibrosis and dysregulation of connexin protein expression, both affecting PWD.(4) Hence, the identification of the demographic, clinical and biological factors associated with a prolonged PWD could be used to detect people at risk of arrhythmia and adverse CV outcomes. Such a detection offers the chance to reduce the risk of stroke and heart failure and

possibly to lower mortality rates.(7) Yet, limited information is available on the influence of each determinant on the prolongation of PWD and, importantly, no standard value of PWD has been defined in an unselected population. We used data from CoLaus/PsyColaus cohort to determine 1) the PWD distribution and 2) the demographic, clinical and biological determinants of PWD.

## METHODS

### Study population and design

The CoLaus/PsyColaus study is a population-based study investigating the clinical, biological and genetic determinants of CV diseases in the population of Lausanne, Switzerland. The sampling strategy and its aims have been described in details elsewhere.(8) The following inclusion criteria were applied: a) written informed consent; b) willingness to take part in the examination and to provide blood samples. The baseline study was conducted between 2003 and 2006, the first follow-up visit between April 2009 and September 2012 and the second follow-up visit between May 2014 and April 2017. Median follow-up time was 10.7 (average 10.9, range 8.8-13.6) years for the second follow-up. As ECG data was only collected during the second follow-up visit, the analysis was restricted to this period.

### Examination and electrocardiography

Standard 12-lead ECGs were recorded in resting supine position at 10 mm/mV calibration and paper speed of 25 mm/s on a Cardiovit MS-2015 electrocardiograph (Schiller AG, Baar, Switzerland). PWD values in milliseconds were calculated using SEMA (V3.5, Schiller AG, Baar, Switzerland) as previously described.(9) A former work demonstrated a good concordance between PWD calculated by Schiller's algorithm and manually measured PWD.(10) Therefore, calculated PWD values were used as references for this study, with two exceptions requiring a manual determination of PWD. The first one included ECGs for which the algorithm was unable to provide a PWD value (e.g. artefacted ECGs). The second one pertained to extreme values of automatically calculated PWD (< 80 ms (< 2 standard deviation) or > 150 ms (> 2 standard deviation)), as it has been shown that such

1  
2  
3 extreme values are often inaccurate.<sup>(10)</sup> When required, PWD was manually calculated by two  
4 investigators (FB and EP). PWD was measured from the beginning of the P-wave defined as the point  
5 where the first atrial deflection departs from the isoelectric line and the end of the P-wave defined  
6 as the point where the atrial deflection returns to the isoelectric line. The two investigators identified  
7 the ECG lead where the measure would be the most accurate and the average PWD value from the  
8 two investigators was used.  
9

### 16 **Covariates**

17  
18 Lifestyle and socio-demographic data were collected using self-filled questionnaires.  
19 Participants were separated into two ethnic groups: Caucasian and other. Smoking status was  
20 defined as never, former, and current smokers. Alcohol consumption was categorized into non-  
21 drinkers, low risk (1-13 units/week), medium risk (14-27 units/week) and high risk (> 28 units/week).  
22 Personal and family history of CV diseases (myocardial infarction, angina pectoris, percutaneous  
23 revascularization or coronary bypass grafting, stroke or transient ischemic attack), the use of  
24 chronotropic medications (class I, II, III and IV antiarrhythmics and digitalis antiarrhythmic) or tricyclic  
25 antidepressants were also collected in the questionnaire. Details on anthropometric, blood pressure,  
26 and biological measures are described in the Appendix 1.  
27  
28  
29  
30  
31  
32  
33  
34  
35  
36  
37  
38

### 39 **Exclusion criteria**

40  
41 Participants were excluded from the analysis if they presented 1) atrial fibrillation/atrial  
42 flutter on the study ECG or Wolf-Parkinson-White ECG pattern (present on the digital or manual  
43 analysis); 2) missing or non-interpretable ECG and 3) missing phenotypic data.  
44  
45  
46  
47

### 48 **Patient and public involvement**

49  
50 No patients or public were involved in this study design, conduct or analysis.  
51

### 52 **Statistical analyses**

53  
54 Statistical analyses were performed using Stata version 15.1 for windows (Stata Corporation,  
55 College Station, Texas, USA). Results were expressed as number of participants (percentage) for  
56  
57  
58  
59  
60



1  
2  
3 categorical data and average  $\pm$  standard deviation or percentiles (10<sup>th</sup>, 25<sup>th</sup>, 50<sup>th</sup>, 75<sup>th</sup> and 90<sup>th</sup>) for  
4  
5 continuous data.  
6

7 The bivariate associations between PWD and continuous variables were assessed through  
8  
9 simple linear regression. The bivariate associations between PWD and categorical variables were  
10  
11 assessed using Kruskal-Wallis test.  
12  
13

14 Variables significantly associated with PWD in the bivariate analysis were then carried  
15  
16 forward for multivariable analysis. The multivariable analysis was conducted using analysis of  
17  
18 variance, and two models were applied. Model 1 was applied for each variable significantly  
19  
20 associated with PWD in the bivariate analysis and adjusted for age, height and gender. Model 2  
21  
22 included all variables significantly associated with PWD in Model 1, including age, height and gender.  
23  
24 As BMI and abdominal obesity categories were closely related, analyses were conducted separately  
25  
26 for each marker (Models 2A and 2B for BMI and waist, respectively). Results were expressed as  
27  
28 multivariable-adjusted mean  $\pm$  standard error for categorical values and as adjusted regression  
29  
30 coefficient for continuous variables. A two-tailed  $p < 0.05$  was considered statistically significant.  
31  
32  
33  
34  
35  
36

## 37 RESULTS

### 38 Selection procedure and characteristics of participants

39  
40 Of the initial 4881 participants at the second follow-up, 3459 (70.9%) were included. The  
41  
42 selection procedure is summarized in Figure 1 and the baseline characteristics of the study sample  
43  
44 are shown in Table 1. The majority of participants were Caucasian and 55% were women. Mean  
45  
46 ( $\pm$ SD) age and BMI were  $62 \pm 10$  years and  $26.4 \pm 4.6$  kg/m<sup>2</sup>, respectively. One fifth of the participants  
47  
48 smoked, two-thirds had dyslipidaemia, 45% had hypertension and 8.5% were diabetic. One quarter  
49  
50 presented with metabolic syndrome and one out of 13 reported a previous history of CV disease.  
51  
52  
53

54 The characteristics of the excluded population are shown in Table 1 for comparison.  
55  
56 Significant differences between both populations were observed for age, BMI categories, alcohol  
57  
58  
59  
60

use, personal and family history of CV diseases, hypertension, dyslipidemia, diabetes, renal failure, use of antiarrhythmic medications, as well as for blood levels of troponin, CRP and NT-pro-BNP.

**Table 1.** Baseline characteristics of the study population, CoLaus/PsyColaus study, Lausanne, Switzerland, 2014-2016.

|                            | Included    | Excluded    | P-value |
|----------------------------|-------------|-------------|---------|
| <b>All</b>                 | 3459        | 1422        |         |
| Age in years (mean; SD)    | 62 ±10      | 65 ±11      | <0.001  |
| Gender                     |             |             |         |
| Men                        | 1543 (44.6) | 649 (45.6)  |         |
| Women                      | 1916 (55.4) | 773 (54.4)  |         |
| Race/ethnicity             |             |             |         |
| Caucasian                  | 3202 (92.6) | 1313 (92.3) |         |
| Other                      | 257 (7.4)   | 109 (7.7)   |         |
| BMI categories             |             |             | 0.005   |
| Normal                     | 1405 (40.6) | 452 (44.2)  |         |
| Overweight                 | 1415 (40.9) | 360 (35.2)  |         |
| Obese                      | 639 (18.5)  | 210 (20.6)  |         |
| Abdominal obesity          | 1298 (37.5) | 395 (38.5)  | 0.562   |
| Smoking                    |             |             | 0.952   |
| Never                      | 1455 (42.1) | 431 (41.6)  |         |
| Former                     | 1349 (39.0) | 405 (39.1)  |         |
| Current                    | 655 (18.9)  | 200 (19.3)  |         |
| Alcohol use                |             |             | <0.001  |
| Non drinker                | 908 (26.3)  | 267 (34.2)  |         |
| Low risk                   | 2076 (60.0) | 412 (52.8)  |         |
| Medium risk                | 386 (11.2)  | 87 (11.1)   |         |
| High risk                  | 89 (2.6)    | 15 (1.9)    |         |
| Personal history of CVD    | 309 (8.9)   | 209 (14.7)  | <0.001  |
| Family history of CVD      | 1344 (38.9) | 421 (29.6)  | <0.001  |
| Hypertension               | 1544 (44.6) | 719 (58.6)  | <0.001  |
| Dyslipidaemia              | 2444 (70.7) | 1064 (74.8) | 0.003   |
| Diabetes                   | 294 (8.5)   | 188 (17.1)  | <0.001  |
| Metabolic syndrome         | 955 (27.6)  | 304 (30.6)  | 0.065   |
| Renal failure              | 373 (10.8)  | 163 (15.5)  | <0.001  |
| Antiarrhythmic medications | 342 (9.9)   | 215 (15.1)  | <0.001  |
| Antidepressant medications | 35 (1.0)    | 15 (1.1)    | 0.892   |
| Troponin T > 14 ng/l       | 226 (8.9)   | 156 (19.3)  | <0.001  |
| CRP ≥ 5 mg/L               | 285 (8.2)   | 111 (15.0)  | <0.001  |

|                       |            |            |        |
|-----------------------|------------|------------|--------|
| NT-proBNP > 125 pg/ml | 702 (32.6) | 365 (51.3) | <0.001 |
|-----------------------|------------|------------|--------|

Abbreviations: BMI, Body Mass Index; CVD, cardiovascular disease; Please refer to the methods and Appendix 1 for the definition of each characteristic. In column excluded, totals might not add to 1422 due to missing data. Results are expressed as mean standard deviation for continuous variables and as number of participants (column percentage) for categorical variables. Between-group comparisons performed using t-test for continuous variables and chi-square for categorical variables.

### PWD measure and distribution

A total of 351 ECG (10.1%) needed a manual determination of PWD according to the previously mentioned criteria. The PWD distribution in the overall sample is illustrated in Figure 2; median and [interquartile range] of PWD were 112 [102-120] ms.

### Association of PWD with demographic, clinical and biological markers

The bivariate associations between PWD and the demographic, clinical, biological markers of interest are summarized in Table 2 (categorical variables only). Longer PWD were found in men; in participants with increased BMI or waist circumference; in former smokers; in participants with increased alcohol consumption, hypertension, dyslipidemia, diabetes, metabolic syndrome or renal failure; in participants with a personal history of CV disease; in participants on antiarrhythmic medications, with higher levels of troponin or NT-proBNP. Figures 3A and 3B illustrate the linear association of PWD with age and height, respectively.

**Table 2.** Bivariate associations between P-wave duration and different demographic, clinical and biological markers, CoLaus/PsyColaus study, Lausanne, Switzerland, 2014-2016.

|                | N    | P-wave duration (ms) |     |     |     |     | p-value |
|----------------|------|----------------------|-----|-----|-----|-----|---------|
|                |      | 10%                  | 25% | 50% | 75% | 90% |         |
| <b>All</b>     | 3459 | 94                   | 102 | 112 | 120 | 128 |         |
| Gender         |      |                      |     |     |     |     | <0.001  |
| Men            | 1543 | 98                   | 106 | 114 | 122 | 132 |         |
| Women          | 1916 | 90                   | 100 | 110 | 118 | 124 |         |
| Race/ethnicity |      |                      |     |     |     |     | 0.155   |
| Other          | 257  | 92                   | 102 | 110 | 118 | 126 |         |
| Caucasian      | 3202 | 94                   | 102 | 112 | 120 | 128 |         |
| BMI categories |      |                      |     |     |     |     | <0.001  |

|    |                            |      |    |     |     |     |     |        |
|----|----------------------------|------|----|-----|-----|-----|-----|--------|
| 1  |                            |      |    |     |     |     |     |        |
| 2  |                            |      |    |     |     |     |     |        |
| 3  | Normal                     | 1405 | 92 | 102 | 110 | 118 | 126 |        |
| 4  | Overweight                 | 1415 | 94 | 104 | 112 | 120 | 128 |        |
| 5  | Obese                      | 639  | 94 | 104 | 114 | 122 | 130 |        |
| 6  |                            |      |    |     |     |     |     |        |
| 7  | Abdominal obesity          |      |    |     |     |     |     | <0.001 |
| 8  | No                         | 2160 | 94 | 102 | 110 | 118 | 126 |        |
| 9  | Yes                        | 1298 | 92 | 104 | 112 | 122 | 130 |        |
| 10 |                            |      |    |     |     |     |     |        |
| 11 | Smoking                    |      |    |     |     |     |     | 0.004  |
| 12 | Never                      | 1455 | 92 | 102 | 110 | 120 | 128 |        |
| 13 | Former                     | 1349 | 94 | 104 | 112 | 120 | 130 |        |
| 14 | Current                    | 655  | 94 | 102 | 110 | 118 | 126 |        |
| 15 |                            |      |    |     |     |     |     |        |
| 16 | Alcohol use                |      |    |     |     |     |     | <0.001 |
| 17 | Non drinker                | 908  | 90 | 100 | 110 | 120 | 128 |        |
| 18 | Low risk                   | 2076 | 94 | 102 | 112 | 120 | 128 |        |
| 19 | Medium risk                | 386  | 98 | 104 | 114 | 122 | 130 |        |
| 20 | High risk                  | 89   | 98 | 106 | 116 | 122 | 130 |        |
| 21 |                            |      |    |     |     |     |     |        |
| 22 | Personal history of CVD    |      |    |     |     |     |     | 0.003  |
| 23 | No                         | 3150 | 94 | 102 | 112 | 120 | 128 |        |
| 24 | Yes                        | 309  | 94 | 104 | 112 | 124 | 132 |        |
| 25 |                            |      |    |     |     |     |     |        |
| 26 | Family history for CVD     |      |    |     |     |     |     | 0.119  |
| 27 | No                         | 2115 | 94 | 104 | 112 | 120 | 128 |        |
| 28 | Yes                        | 1344 | 92 | 102 | 110 | 120 | 128 |        |
| 29 |                            |      |    |     |     |     |     |        |
| 30 | Hypertension               |      |    |     |     |     |     | <0.001 |
| 31 | No                         | 1915 | 92 | 102 | 110 | 118 | 124 |        |
| 32 | Yes                        | 1544 | 96 | 106 | 114 | 122 | 130 |        |
| 33 |                            |      |    |     |     |     |     |        |
| 34 | Dyslipidaemia              |      |    |     |     |     |     | 0.004  |
| 35 | No                         | 1015 | 92 | 102 | 110 | 120 | 126 |        |
| 36 | Yes                        | 2444 | 94 | 104 | 112 | 120 | 128 |        |
| 37 |                            |      |    |     |     |     |     |        |
| 38 | Diabetes                   |      |    |     |     |     |     | 0.012  |
| 39 | No                         | 3160 | 94 | 102 | 112 | 120 | 128 |        |
| 40 | Yes                        | 294  | 94 | 104 | 112 | 122 | 132 |        |
| 41 |                            |      |    |     |     |     |     |        |
| 42 | Metabolic syndrome         |      |    |     |     |     |     | <0.001 |
| 43 | No                         | 2503 | 94 | 102 | 110 | 120 | 126 |        |
| 44 | Yes                        | 955  | 94 | 104 | 112 | 122 | 132 |        |
| 45 |                            |      |    |     |     |     |     |        |
| 46 | Renal failure              |      |    |     |     |     |     | 0.006  |
| 47 | No                         | 3086 | 94 | 102 | 112 | 120 | 128 |        |
| 48 | Yes                        | 373  | 94 | 104 | 112 | 122 | 130 |        |
| 49 |                            |      |    |     |     |     |     |        |
| 50 | Antiarrhythmic medications |      |    |     |     |     |     | <0.001 |
| 51 | No                         | 3117 | 94 | 102 | 110 | 120 | 126 |        |
| 52 | Yes                        | 342  | 96 | 106 | 116 | 126 | 134 |        |
| 53 |                            |      |    |     |     |     |     |        |
| 54 | Antidepressant medications |      |    |     |     |     |     | 0.860  |
| 55 | No                         | 3424 | 94 | 102 | 112 | 120 | 128 |        |
| 56 | Yes                        | 35   | 92 | 100 | 112 | 120 | 126 |        |
| 57 |                            |      |    |     |     |     |     |        |
| 58 | Troponin $\geq$ 14 ng/L    |      |    |     |     |     |     | <0.001 |
| 59 |                            |      |    |     |     |     |     |        |
| 60 |                            |      |    |     |     |     |     |        |

1  
2  
3  
4  
5  
6  
7  
8  
9  
10  
11  
12  
13  
14  
15  
16  
17  
18  
19  
20  
21  
22  
23  
24  
25  
26  
27  
28  
29  
30  
31  
32  
33  
34  
35  
36  
37  
38  
39  
40  
41  
42  
43  
44  
45  
46  
47  
48  
49  
50  
51  
52  
53  
54  
55  
56  
57  
58  
59  
60

|                           |      |    |     |     |     |     |        |
|---------------------------|------|----|-----|-----|-----|-----|--------|
| No                        | 2311 | 94 | 104 | 112 | 120 | 130 |        |
| Yes                       | 226  | 94 | 106 | 118 | 126 | 136 |        |
| CRP $\geq$ 5 mg/L         |      |    |     |     |     |     | 0.354  |
| No                        | 3174 | 94 | 102 | 112 | 120 | 128 |        |
| Yes                       | 285  | 96 | 104 | 112 | 120 | 126 |        |
| NT-proBNP $\geq$ 125 ng/L |      |    |     |     |     |     | <0.001 |
| No                        | 1450 | 92 | 102 | 110 | 118 | 126 |        |
| Yes                       | 702  | 92 | 104 | 112 | 122 | 132 |        |

*Abbreviations: ms, milliseconds; BMI, Body Mass Index; CVD, cardiovascular disease. Please refer to the methods and Appendix 1 for the definition of each characteristic.*

The multivariable associations of PWD with the demographic, clinical and biological markers are summarized in Table 3. After adjusting for age, height and gender in the Model 1, only BMI categories, abdominal obesity, hypertension and antiarrhythmic medications remained significantly associated with PWD. Inclusion of all variables in the Model 2 showed age, height, gender, obesity markers (BMI or abdominal obesity) and antiarrhythmic medications to be significantly associated with PWD, while the association with hypertension was only found in the Model 2B that included abdominal obesity.

**Table 3.** Multivariable associations between P-wave duration and different demographic, clinical and biological markers, CoLaus/PsyColaus study, Lausanne, Switzerland, 2014-2016.

| Characteristics         | Model 1     | P-value | Model 2A           | P-value | Model 2B           | P-value |
|-------------------------|-------------|---------|--------------------|---------|--------------------|---------|
| Age (continuous)        | -           |         | 0.29 (0.22 - 0.36) | <0.001  | 0.30 (0.25 - 0.35) | <0.001  |
| Height (continuous)     | -           |         | 0.31 (0.27 - 0.36) | <0.001  | 0.27 (0.20 - 0.34) | <0.001  |
| Gender                  |             |         |                    | <0.001  |                    | <0.001  |
| Woman                   | -           |         | 110.0 ± 0.4        |         | 109.8 ± 0.4        |         |
| Man                     | -           |         | 112.1 ± 0.4        |         | 112.4 ± 0.4        |         |
| BMI categories          |             | <0.001  |                    | <0.001  |                    |         |
| Normal                  | 109.9 ± 0.4 |         | 110.1 ± 0.4        |         |                    |         |
| Overweight              | 110.9 ± 0.3 |         | 110.9 ± 0.4        |         |                    |         |
| Obese                   | 113.2 ± 0.5 |         | 112.9 ± 0.5        |         |                    |         |
| Abdominal obesity       |             | <0.001  |                    |         |                    | 0.022   |
| No                      | 110.4 ± 0.3 |         |                    |         | 110.5 ± 0.3        |         |
| Yes                     | 112.0 ± 0.4 |         |                    |         | 111.7 ± 0.4        |         |
| Smoking                 |             | 0.628   |                    |         |                    |         |
| Never                   | 111.0 ± 0.3 |         | -                  |         | -                  |         |
| Former                  | 111.1 ± 0.4 |         | -                  |         | -                  |         |
| Current                 | 110.5 ± 0.5 |         | -                  |         | -                  |         |
| Alcohol use             |             | 0.859   |                    |         |                    |         |
| Non drinker             | 110.7 ± 0.4 |         | -                  |         | -                  |         |
| Low risk                | 110.9 ± 0.3 |         | -                  |         | -                  |         |
| Medium risk             | 111.4 ± 0.7 |         | -                  |         | -                  |         |
| High risk               | 111.6 ± 1.4 |         | -                  |         | -                  |         |
| Personal history of CVD |             | 0.925   |                    |         |                    |         |
| No                      | 110.9 ± 0.2 |         | -                  |         | -                  |         |

|    |                   |             |         |             |       |             |
|----|-------------------|-------------|---------|-------------|-------|-------------|
| 1  |                   |             |         |             |       |             |
| 2  |                   |             |         |             |       |             |
| 3  | Yes               | 111.0 ± 0.8 |         | -           |       | -           |
| 4  | Hypertension      |             | <0.001  |             | 0.065 | 0.020       |
| 5  |                   |             |         |             |       |             |
| 6  | No                | 110.1 ± 0.3 |         | 110.5 ± 0.3 |       | 110.4 ± 0.3 |
| 7  | Yes               | 112.0 ± 0.3 |         | 111.5 ± 0.4 |       | 111.6 ± 0.4 |
| 8  | Dyslipidaemia     |             | 0.318   |             |       |             |
| 9  |                   |             |         |             |       |             |
| 10 | No                | 110.6 ± 0.4 |         | -           |       | -           |
| 11 | Yes               | 111.1 ± 0.3 |         | -           |       | -           |
| 12 | Diabetes          |             | 0.548   |             |       |             |
| 13 |                   |             |         |             |       |             |
| 14 | No                | 111.0 ± 0.2 |         | -           |       | -           |
| 15 | Yes               | 110.5 ± 0.8 |         | -           |       | -           |
| 16 | Metabolic         |             | 0.113   |             |       |             |
| 17 | syndrome          |             |         |             |       |             |
| 18 |                   |             |         |             |       |             |
| 19 | No                | 110.7 ± 0.3 |         | -           |       | -           |
| 20 | Yes               | 111.5 ± 0.4 |         | -           |       | -           |
| 21 | Renal failure     |             | 0.866   |             |       |             |
| 22 |                   |             |         |             |       |             |
| 23 | No                | 111.0 ± 0.2 |         | -           |       | -           |
| 24 | Yes               | 110.8 ± 0.7 |         | -           |       | -           |
| 25 | Antiarrhythmic    |             | < 0.001 |             | 0.006 | 0.004       |
| 26 | medications       |             |         |             |       |             |
| 27 |                   |             |         |             |       |             |
| 28 | No                | 110.6 ± 0.2 |         | 110.7 ± 0.2 |       | 110.7 ± 0.2 |
| 29 | Yes               | 113.7 ± 0.7 |         | 113.0 ± 0.8 |       | 113.1 ± 0.8 |
| 30 | Troponin ≥14 ng/L |             | 0.920   |             |       |             |
| 31 |                   |             |         |             |       |             |
| 32 | No                | 112.4 ± 0.3 |         | -           |       | -           |
| 33 | Yes               | 112.5 ± 1.0 |         | -           |       | -           |
| 34 | NT-proBNP ≥125    |             | 0.310   |             |       |             |
| 35 | ng/L              |             |         |             |       |             |
| 36 |                   |             |         |             |       |             |
| 37 | No                | 110.5 ± 0.4 |         | -           |       | -           |
| 38 | Yes               | 111.2 ± 0.5 |         | -           |       | -           |
| 39 |                   |             |         |             |       |             |

1  
2  
3 -, not included in the model. BMI, Body Mass Index; CVD, cardiovascular disease. Results are expressed as adjusted coefficient (95% confidence interval) for  
4 continuous variables and as average  $\pm$  standard error for categorical variables. Model 1: adjusted for age (continuous), height (continuous) and gender. Full  
5 model (2A and 2B): including all variables indicated. Please refer to the methods and Appendix 1 for the definition of each characteristic.  
6  
7  
8  
9  
10  
11  
12  
13  
14  
15  
16  
17  
18  
19  
20  
21  
22  
23  
24  
25  
26  
27  
28  
29  
30  
31  
32  
33  
34  
35  
36  
37  
38  
39  
40  
41  
42  
43  
44  
45  
46

For peer review only



## DISCUSSION

To our knowledge, this is the first study assessing the PWD and its demographic, clinical and biological determinants in the Swiss population. On a study sample of 3459 participants, we found that age, height, gender, obesity markers, hypertension and use of antiarrhythmic medications were associated with PWD.

### PWD and age

We found that aging was associated with prolonged PWD, a finding also reported by others in several studies.(2, 3, 5) Electrophysiologic studies and electroanatomic mapping of the atria demonstrated abnormal conduction in older subjects,(2) which appeared to be related to atrial structural changes and to interstitial fibrosis in particular.(11) Collagenous septa separate small groups of muscular fibres, causing electrical uncoupling.(11) In addition, aging is also associated with atrial dilatation, which contributes to prolonged PWD.(12)

### PWD and height

Height has been associated with electrocardiographic modifications, particularly with the prolongation of PR interval and QRS duration.(13) Still, little is known regarding the association between height and PWD. In our study, we observed that tall individuals had longer PWD. This finding fits with the literature showing that height is a strong determinant of left atrial size, and that left atrial enlargement is associated with mechanical stress responsible for slower atrial conduction.(13)

### PWD and gender

Men had longer PWD than women, a finding also reported elsewhere.(2, 3, 5) The multivariable models we used may not account for all the anthropometric differences between men and women.(5) For instance, the heart size has been shown to be greater in men than in women.(12) Other factors may play a role, such as the effect of sex hormones but there is currently a paucity of data regarding the possible effect of sex hormones on PWD.(12)

### PWD and obesity markers

1  
2  
3 BMI categories or abdominal obesity were positively associated with PWD, a finding also  
4 reported elsewhere.(2, 3, 14) Interestingly, obesity has well known effects on the heart, an entity  
5 known as metabolic cardiomyopathy. Obesity is responsible for structural and functional changes in  
6 cardiomyocytes independently of coronary artery disease or hypertension.(14) Regarding the  
7 metabolic cardiomyopathy, an important pathophysiological mechanism is the systemic pro-  
8 inflammatory status induced by obesity. This eventually induces low-grade inflammation in the heart  
9 with dysfunction of subcellular components (mitochondrial dysfunction; oxidative stress and  
10 impaired calcium handling), inflammatory cell infiltration and neurohumoral activation.(15)  
11 Advanced stages are characterized by apoptosis, adipocytosis, fibrosis and atrial remodelling.(15) A  
12 second important pathophysiological mechanism is the fatty acid accumulation in the  
13 cardiomyocytes. The normal heart reaches a balance between free fatty acid (FFA) uptake and  
14 oxidation. The increased level of circulating FFA observed in obesity eventually results in  
15 accumulation of lipid droplets within the cardiomyocytes, impacting cardiac function and promoting  
16 apoptosis also known as lipotoxic cardiomyopathy.(15, 16) Studies have shown an association  
17 between cardiomyocyte fat content and ECG changes including longer PWD.(14, 17)

### 36 **PWD and hypertension**

37  
38  
39 Hypertension was positively correlated with PWD after multivariable adjustments in both  
40 models (1 and 2B), an association also reported by others.(3, 7) Left ventricular hypertrophy and  
41 diastolic dysfunction caused by high blood pressure are responsible for increased atrial strain with  
42 subsequent dilatation and fibrosis.(7, 18) These changes have repercussions on electrical conduction  
43 and, therefore, PWD.(18)

### 49 **PWD and antiarrhythmic medications**

50  
51  
52 Antiarrhythmic medications are responsible for several electrocardiographic modifications  
53 such as PR interval, QRS or QT prolongation.(19) These medications are used to control cardiac  
54 arrhythmias through their effects on cardiomyocytes' ion channels and adrenergic receptors, thereby  
55 slowing the conduction time and increasing the refractory period.(19) Little is know about the effects  
56  
57  
58  
59  
60

1  
2  
3 of antiarrhythmic medications on PWD. While the association between PWD and the use of  
4 antiarrhythmic medications was clearly significant in our study, our interpretation is limited because  
5 the various Vaughan Williams antiarrhythmic classes were considered as a single group by study  
6 design.  
7  
8  
9  
10  
11  
12  
13

#### 14 **STUDY STRENGTHS AND LIMITATIONS**

15  
16 Our study was conducted in a population-based sample allowing for the generalization of the  
17 results to similar Caucasian populations. The large sample size of our study population, together with  
18 the full set of collected data, allowed us to explore associations between PWD and a number of  
19 relevant variables. All the significant associations found in our study can be easily related with  
20 underlying (patho)physiological mechanisms.  
21  
22  
23  
24  
25  
26

27 Our study has also some limitations. First, there is no published consensus about the  
28 measurement of PWD. Most studies used automated measurements provided by different  
29 softwares. Each software has its own specific algorithm susceptible to give slightly different  
30 values.<sup>(20)</sup> Second, we used the SEMA software to calculate automatically PWD values. A number of  
31 studies have included additional markers of atrial electromechanical function (i.e. P-wave indices,  
32 such as P-wave terminal force), which were not part of the results provided by the software we used.  
33  
34 Another limitation of our study is our inability to correlate PWD with the left atrial size as determined  
35 by echocardiography, which was not part of our study design.  
36  
37  
38  
39  
40  
41  
42  
43  
44  
45  
46  
47

#### 48 **FUTURE DIRECTIONS**

49  
50 Considering the metabolic diseases' burden, incidence of cardiovascular events and death  
51 will continue to be high. PWD, as an intermediate phenotype reflecting subclinical, structural and  
52 functional changes in the atria, can be a useful marker to both assess and monitor the risk of  
53 developing AF and worse CV outcomes.<sup>(1, 7)</sup> Future work could determine if preventive  
54  
55  
56  
57  
58  
59  
60

1  
2  
3 interventions (e. g. lifestyle and dietary intervention) based on the PWD have positive effects on  
4  
5 clinical outcomes.  
6  
7  
8  
9

## 10 **CONCLUSION**

11  
12 In a cross-sectional study conducted on a large sample of a population-based cohort, PWD  
13  
14 was associated with age, height, male gender, obesity markers, hypertension and use of  
15  
16 antiarrhythmic medications. Most of these associations could possibly relate to both structural and  
17  
18 functional changes affecting the atrial tissue.  
19  
20  
21  
22

## 23 **ACKNOWLEDGEMENTS**

24  
25 Nobody to acknowledge.  
26  
27  
28  
29

## 30 **OTHER REQUIRED STATEMENTS**

### 31 **Contributors**

32  
33  
34 FB conducted the literature search, interpreted the results and wrote the manuscript. PM-V  
35  
36 performed the statistical analyses and contributed to write a part of the manuscript. DG interpreted  
37  
38 the results and thoroughly revised the manuscript for important intellectual content. FB and EP  
39  
40 calculated manually, when required, the P-wave duration. PV and GW participated to conceiving the  
41  
42 study. All authors have read and approved this version of the manuscript.  
43  
44  
45

### 46 **Funding**

47  
48 This work was and is supported by research grants from GlaxoSmithKline; the Faculty of  
49  
50 Biology and Medicine of Lausanne; and the Swiss National Science Foundation [33CSCO-122661,  
51  
52 33CS30-139468 and 33CS30-148401). The founding sources had no involvement in the study design,  
53  
54 data collection, analysis and interpretation, writing of the report, or decision to submit the article for  
55  
56 publication.  
57  
58

### 59 **Competing interests**

1  
2  
3 None declared.  
4

5 **Patient consent for publication**  
6

7 Not required.  
8  
9

10 **Ethics approval**  
11

12 The Ethics Committee of Canton Vaud ([www.cer-vd.ch](http://www.cer-vd.ch)) approved the CoLaus/PsyColaus  
13 study (reference 16/03); the approval was renewed for the first (reference 33/09) and the second  
14 (reference 26/14) follow-ups. The full decisions can be obtained from the authors upon request. The  
15 study was performed in agreement with the Helsinki declaration and in accordance with the  
16 applicable Swiss legislation. All participants gave their signed informed consent before entering the  
17 study.  
18  
19  
20  
21  
22  
23  
24

25 **Provenance and peer review**  
26

27 Not commissioned; externally peer reviewed.  
28  
29

30 **Data availability statement**  
31

32 Due to the sensitivity of the data and the lack of consent for online posting, individual data  
33 cannot be made accessible. Only metadata will be made available in digital repositories. Metadata  
34 requests can also be performed via the study website [www.colaus-psycolaus.ch](http://www.colaus-psycolaus.ch).  
35  
36  
37  
38  
39  
40  
41  
42  
43  
44  
45  
46  
47  
48  
49  
50  
51  
52  
53  
54  
55  
56  
57  
58  
59  
60

## REFERENCES

1. Hari KJ, Nguyen TP, Soliman EZ. Relationship between P-wave duration and the risk of atrial fibrillation. *Expert Rev Cardiovasc Ther* 2018;16:837-843.
2. Magnani JW, Gorodeski EZ, Johnson VM, et al. P wave duration is associated with cardiovascular and all-cause mortality outcomes: the National Health and Nutrition Examination Survey. *Heart Rhythm* 2011;8:93-100.
3. Lehtonen AO, Langén VL, Puukka PJ, et al. Incidence rates, correlates, and prognosis of electrocardiographic P-wave abnormalities - a nationwide population-based study. *J Electrocardiol* 2017;50:925-932.
4. Magnani JW, Williamson MA, Ellinor PT, et al. P wave indices: current status and future directions in epidemiology, clinical, and research applications. *Circ Arrhythm Electrophysiol* 2009;2:72-79.
5. Havmoller R, Carlson J, Holmqvist F, et al. Age-related changes in P wave morphology in healthy subjects. *BMC Cardiovasc Disord* 2007;7:22.
6. Lehtonen AO, Puukka P, Varis J, et al. Prevalence and prognosis of ECG abnormalities in normotensive and hypertensive individuals. *J Hypertens* 2016;34:959-966.
7. Alonso A, Soliman EZ, Chen LY, et al. Association of blood pressure and aortic distensibility with P wave indices and PR interval: the multi-ethnic study of atherosclerosis (MESA). *J Electrocardiol* 2013;46:359.e1-6.
8. Firmann M, Mayor V, Vidal PM, et al. The CoLaus study: a population-based study to investigate the epidemiology and genetic determinants of cardiovascular risk factors and metabolic syndrome. *BMC Cardiovasc Disord* 2008;8:6.
9. Kligfield P, Badilini F, Denjoy I, et al. Comparison of automated interval measurements by widely used algorithms in digital electrocardiographs. *Am Heart J* 2018;200:1-10.
10. Haefliger D, Pruvot E, Monney P, et al. Validation de la mesure de la durée de l'onde P dans une étude de population. 2014.

- 1  
2  
3 [https://serval.unil.ch/resource/serval:BIB\\_D2B2D1437FA9.P001/REF.pdf](https://serval.unil.ch/resource/serval:BIB_D2B2D1437FA9.P001/REF.pdf)  
4  
5  
6 11. Spach MS, Dolber PC. Relating extracellular potentials and their derivatives to anisotropic  
7 propagation at a microscopic level in human cardiac muscle. Evidence for electrical uncoupling  
8 of side-to-side fiber connections with increasing age. *Circ Res* 1986;58:356-371.  
9  
10  
11  
12 12. Liu XK, Jahangir A, Terzic A, et al. Age- and sex-related atrial electrophysiologic and structural  
13 changes. *Am J Cardiol* 2004;94:373-375.  
14  
15  
16 13. Kofler T, Thériault S, Bossard M, et al. Relationships of Measured and Genetically Determined  
17 Height With the Cardiac Conduction System in Healthy Adults. *Circ Arrhythm Electrophysiol*  
18 2017;10.  
19  
20  
21  
22  
23 14. Babcock MJ, Soliman EZ, Ding J, et al. Pericardial fat and atrial conduction abnormalities in the  
24 Multiethnic Study of Atherosclerosis (MESA). *Obesity (Silver Spring)* 2011;19:179-184.  
25  
26  
27 15. Nishida K, Otsu K. Inflammation and metabolic cardiomyopathy. *Cardiovasc Res* 2017;113:389-  
28 398.  
29  
30  
31  
32 16. Alí A, Boutjdir M, Aromolaran AS. Cardioprototoxicity, Inflammation, and Arrhythmias: Role for  
33 Interleukin-6 Molecular Mechanisms. *Front Physiol* 2018;9:1866.  
34  
35  
36 17. Friedman DJ, Wang N, Meigs JB, et al. Pericardial fat is associated with atrial conduction: the  
37 Framingham Heart Study. *J Am Heart Assoc* 2014;3:e000477.  
38  
39  
40  
41 18. Okutucu S, Aytemir K, Oto A. P-wave dispersion: What we know till now. *JRSM Cardiovasc Dis*  
42 2016;5:1-9.  
43  
44  
45 19. Zimetbaum P. Antiarrhythmic drug therapy for atrial fibrillation. *Circulation* 2012;125:381-389.  
46  
47  
48 20. Schläpfer J, Wellens HJ. Computer-Interpreted Electrocardiograms: Benefits and Limitations. *J*  
49 *Am Coll Cardiol* 2017;70:1183-1192.  
50  
51  
52  
53  
54  
55  
56  
57  
58  
59  
60

1  
2  
3 **FIGURE LEGENDS**  
4

5 **Figure 1.** Selection procedure. Percentages were calculated using the baseline sample size as  
6 denominator.  
7

8  
9  
10 **Figure 2.** Distribution of P-wave duration in the whole sample, CoLaus/PsyColaus study, Lausanne,  
11 Switzerland, 2014-2016.  
12

13  
14 **Figure 3. A** Association between P-wave duration and age. **B** Association between P-wave duration  
15 and height. The green horizontal line represents the sample average; the red line represents the  
16 linear regression.  
17  
18  
19  
20  
21  
22  
23  
24  
25  
26  
27  
28  
29  
30  
31  
32  
33  
34  
35  
36  
37  
38  
39  
40  
41  
42  
43  
44  
45  
46  
47  
48  
49  
50  
51  
52  
53  
54  
55  
56  
57  
58  
59  
60



# Figure 1

1  
2  
3  
4  
5  
6  
7  
8  
9  
10  
11  
12  
13  
14  
15  
16  
17  
18  
19  
20  
21  
22  
23  
24  
25  
26  
27  
28  
29  
30  
31  
32  
33  
34  
35  
36  
37  
38  
39  
40  
41  
42  
43  
44  
45  
46  
47  
48  
49  
50  
51  
52  
53  
54  
55  
56  
57  
58  
59  
60

**A**

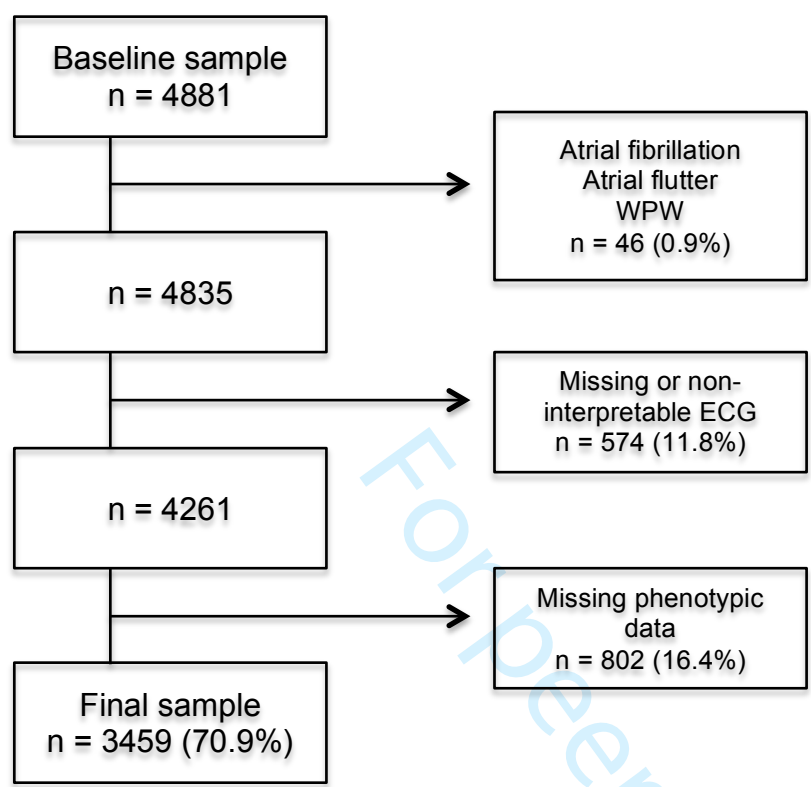

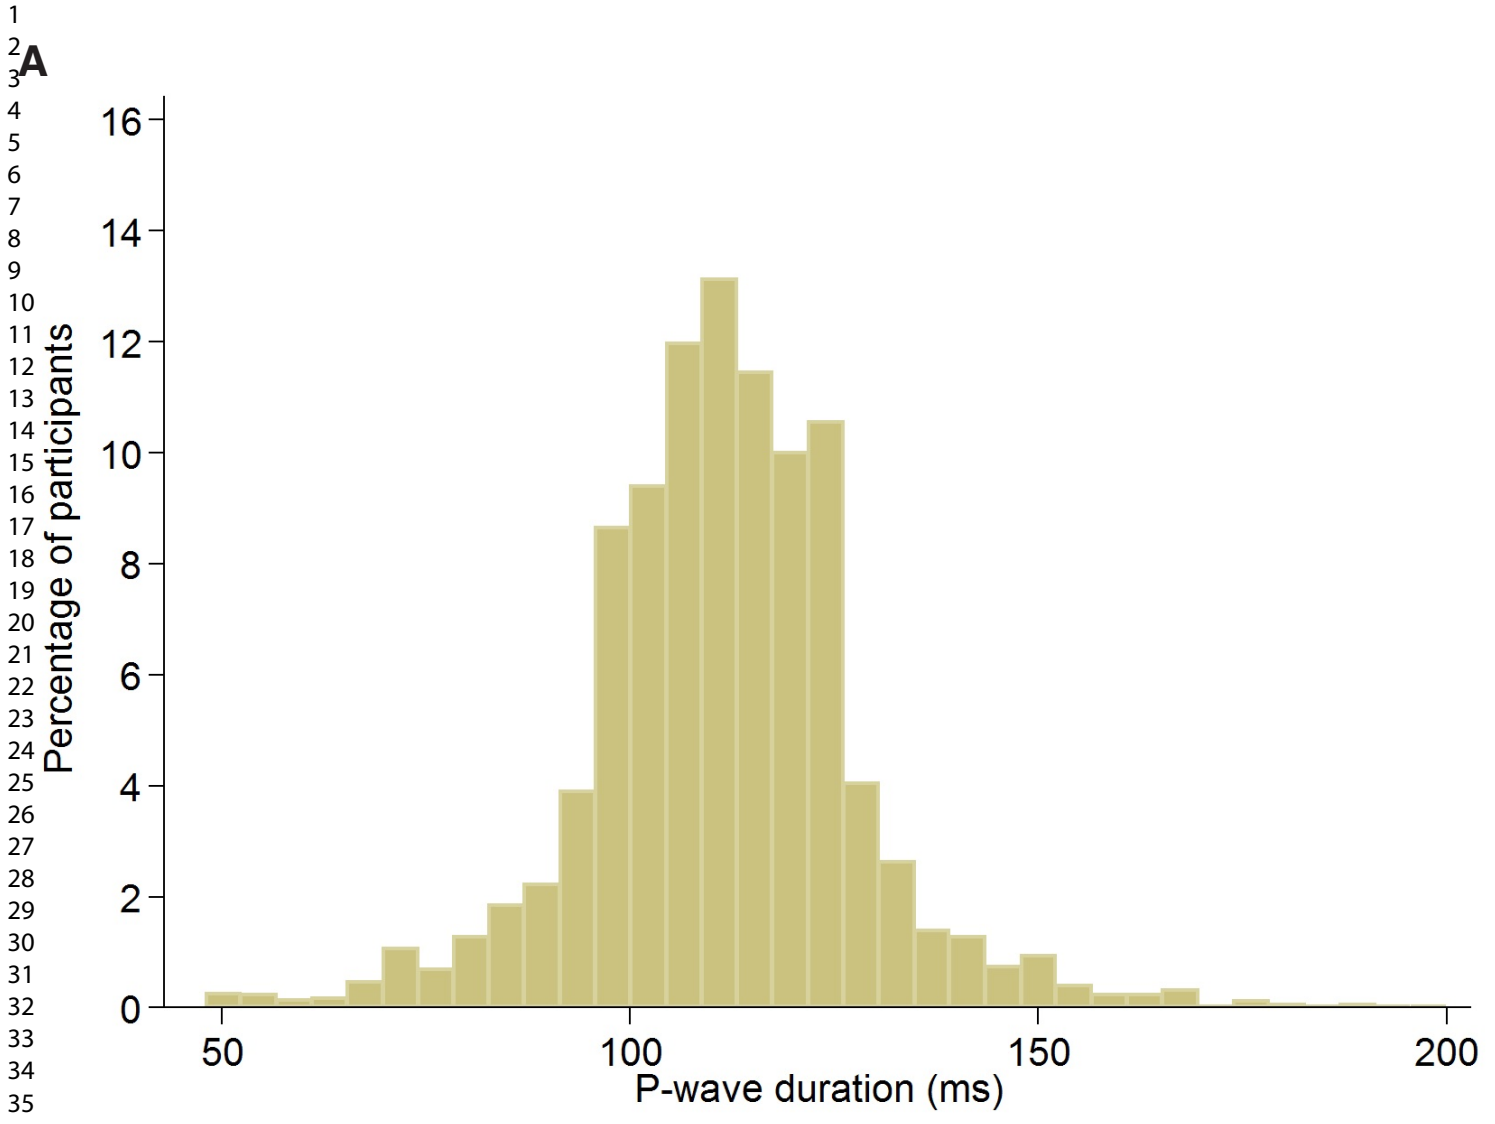

For peer review only

# Figure 3

1  
2  
3  
4  
5  
6  
7  
8  
9  
10  
11  
12  
13  
14  
15  
16  
17  
18  
19  
20  
21  
22  
23  
24  
25  
26  
27  
28  
29  
30  
31  
32  
33  
34  
35  
36  
37  
38  
39  
40  
41  
42  
43  
44  
45  
46  
47  
48  
49  
50  
51  
52  
53  
54  
55  
56  
57  
58  
59  
60

**A**

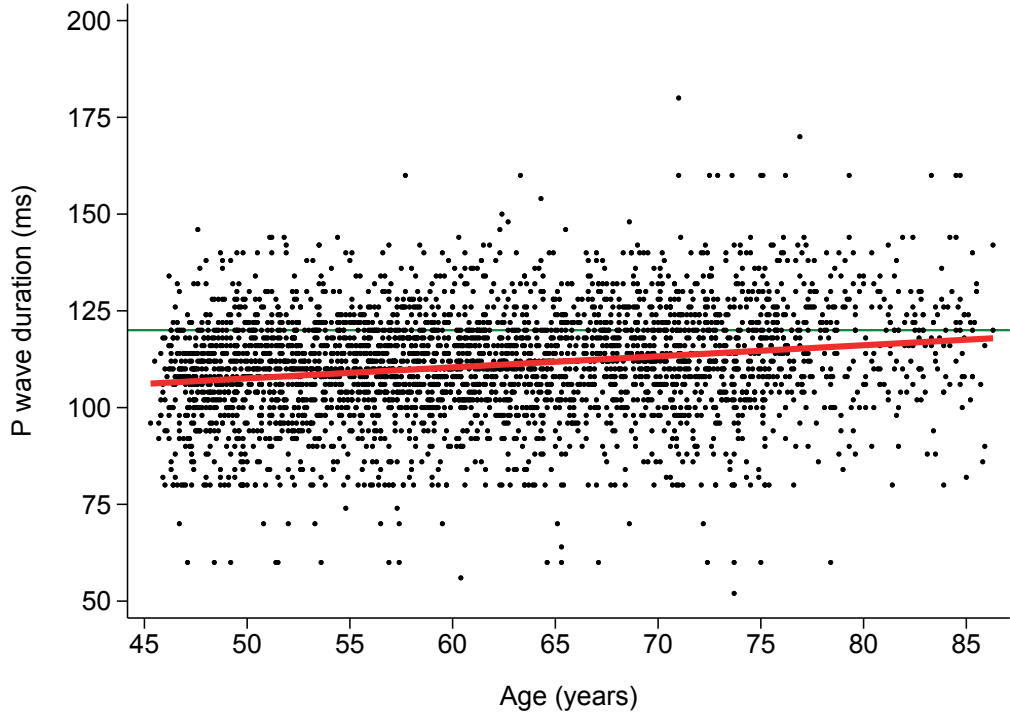

**B**

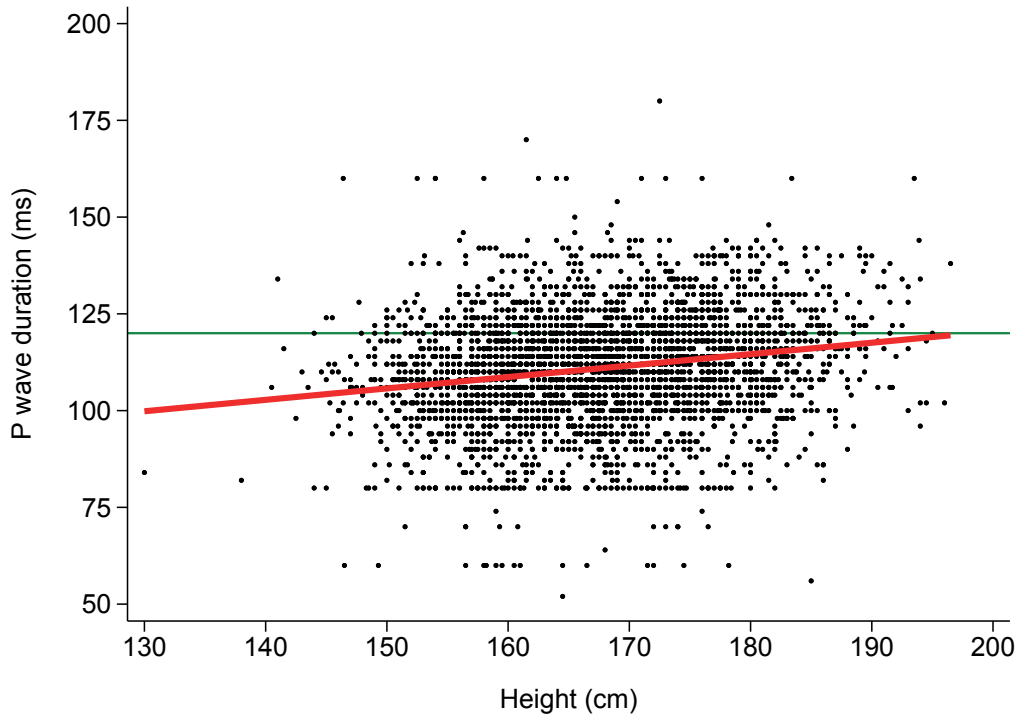

## APPENDIX 1

**Anthropometric measures and blood pressure measures are described in this Appendix. It also includes a description of the methods used to determine the biological values. A specific set of references is provided for this Appendix.**

Body weight and height were measured with participants standing without shoes in light indoor clothing. Weight was measured in kilograms to the nearest 0.1 kg using a Seca™ scale (Seca, Hamburg, Germany). Height was measured to the nearest 5 mm using a Seca™ height gauge (Seca, Hamburg, Germany). Body mass index (BMI) was defined as weight (kg)/height<sup>2</sup> (m<sup>2</sup>). Obesity was defined as BMI ≥ 30 kg/m<sup>2</sup>, overweight as BMI ≥ 25 and < 30 kg/m<sup>2</sup> and normal as BMI ≤ 25 kg/m<sup>2</sup>. Due to the small number of underweight participants (n=55), they were included in the normal category.

Waist circumference was measured mid-way between the lowest rib and the iliac crest and abdominal obesity was defined as waist circumference > 102 cm or > 88 cm for men and women respectively.(1)

Blood pressure (BP) was measured thrice on the left arm after at least 10 minutes rest in the seated position using a clinically validated automated oscillometric device (Omron® HEM-907, Matsusaka, Japan) with a standard cuff, or a large cuff if arm circumference was ≥ 33 cm. The average of the last two measurements was used. Hypertension was defined as mean systolic BP (SBP) ≥ 140 mmHg and/or a mean diastolic BP (DBP) ≥ 90 mmHg and/or use of anti-hypertensive medication.

Venous blood samples (50 mL) were drawn in the fasting state. All biological assays were performed at the clinical laboratory of the Lausanne University Hospital within 2 hours of blood collection on fresh samples. Glycated haemoglobin (HbA1c) was measured by high performance liquid chromatography (Bio-Rad, D-10™). Subjects were considered to have diabetes if they had a serum HbA1c ≥ 6.5% (≥48 nmol/mmol) and/or were taking anti-diabetic treatment.

1  
2  
3  
4  
5 Total cholesterol was measured by CHOD-PAP; HDL-cholesterol by CHOD-PAP + PEG + cyclodextrin;  
6  
7 triglycerides by GPO-PAP. In our analysis, dyslipidemia was defined as triglycerides  $\geq 2$  mmol/l and/or  
8  
9 LDL  $\geq 3$  mmol/l and/or lipid lowering treatment.

11 High sensitivity CRP was assessed by immunoassay (HS latex) and was considered elevated  
12  
13 when  $\geq 5$  mg/l. Serum and urinary creatinine were performed by the Jaffe kinetic compensated  
14  
15 method. Renal failure was considered when eGFR was  $< 60$  ml/min/1.73m<sup>2</sup> using CKD-EPI formula.  
16  
17 Troponine T hs and NT-proBNP were measured by electrochemiluminescence and considered  
18  
19 elevates when  $\geq 14$  ng/l and 125 ng/l respectively. Biological threshold were defined based on the  
20  
21 standard values in our clinical laboratory (Lausanne University Hospital). Since the threshold value for  
22  
23 a positive NT-proBNP result usually increased with age, we only considered the lowest threshold  
24  
25 value available in our laboratory (i.e. 125 ng/l), as a simple, more sensitive approach to the potential  
26  
27 effect of this variable.  
28  
29  
30

31  
32 The metabolic syndrome was retained in presence of any 3 out of 5 risk factors on the basis  
33  
34 of the JIS (Joint Interim Statement) definition. The criteria for clinical diagnosis are: elevated waist  
35  
36 circumference ( $\geq 102$  cm for men and  $\geq 88$  cm for women), elevated triglycerides ( $\geq 1.7$  mmol/l),  
37  
38 reduced HDL-C ( $< 1.0$  mmol/l for men and  $< 1.3$  mmol/l for women), elevated BP (systolic BP  $\geq 130$   
39  
40 mm Hg and/or diastolic BP  $\geq 85$  mm Hg), elevated fasting glucose ( $\geq 5.6$  mmol/l).(2)  
41  
42  
43  
44  
45  
46  
47  
48  
49  
50  
51  
52  
53  
54  
55  
56  
57  
58  
59  
60

## REFERENCES

1. National Cholesterol Education Program (NCEP) Expert Panel on Detection E, and Treatment of High Blood Cholesterol in Adults (Adult Treatment Panel III. Third Report of the National Cholesterol Education Program (NCEP) Expert Panel on Detection, Evaluation, and Treatment of High Blood Cholesterol in Adults (Adult Treatment Panel III) final report. *Circulation* 2002;106:3143-3421.
2. Alberti KG, Eckel RH, Grundy SM, et al. Harmonizing the metabolic syndrome: a joint interim statement of the International Diabetes Federation Task Force on Epidemiology and Prevention; National Heart, Lung, and Blood Institute; American Heart Association; World Heart Federation; International Atherosclerosis Society; and International Association for the Study of Obesity. *Circulation* 2009;120:1640-1645.

# BMJ Open

## Clinical and biological determinants of P-wave duration: Cross-sectional data from the population-based CoLaus|PsyColaus-study

|                                 |                                                                                                                                                                                                                                                                       |
|---------------------------------|-----------------------------------------------------------------------------------------------------------------------------------------------------------------------------------------------------------------------------------------------------------------------|
| Journal:                        | <i>BMJ Open</i>                                                                                                                                                                                                                                                       |
| Manuscript ID                   | bmjopen-2020-038828.R1                                                                                                                                                                                                                                                |
| Article Type:                   | Original research                                                                                                                                                                                                                                                     |
| Date Submitted by the Author:   | 22-Jun-2020                                                                                                                                                                                                                                                           |
| Complete List of Authors:       | Bocchi, Federica; CHUV, Internal medicine<br>Marques-Vidal, Pedro; CHUV, Internal Medicine<br>Pruvot, Etienne; CHUV, Cardiology<br>Waeber, Gerard; CHUV, Internal Medicine<br>Vollenweider, Peter; CHUV, Internal Medicine<br>Gachoud, David; CHUV, Internal Medicine |
| <b>Primary Subject Heading</b>: | Cardiovascular medicine                                                                                                                                                                                                                                               |
| Secondary Subject Heading:      | Cardiovascular medicine, Epidemiology                                                                                                                                                                                                                                 |
| Keywords:                       | EPIDEMIOLOGY, Adult cardiology < CARDIOLOGY, Cardiac Epidemiology < CARDIOLOGY, Cardiology < INTERNAL MEDICINE                                                                                                                                                        |
|                                 |                                                                                                                                                                                                                                                                       |

SCHOLARONE™  
Manuscripts



I, the Submitting Author has the right to grant and does grant on behalf of all authors of the Work (as defined in the below author licence), an exclusive licence and/or a non-exclusive licence for contributions from authors who are: i) UK Crown employees; ii) where BMJ has agreed a CC-BY licence shall apply, and/or iii) in accordance with the terms applicable for US Federal Government officers or employees acting as part of their official duties; on a worldwide, perpetual, irrevocable, royalty-free basis to BMJ Publishing Group Ltd ("BMJ") its licensees and where the relevant Journal is co-owned by BMJ to the co-owners of the Journal, to publish the Work in this journal and any other BMJ products and to exploit all rights, as set out in our [licence](#).

The Submitting Author accepts and understands that any supply made under these terms is made by BMJ to the Submitting Author unless you are acting as an employee on behalf of your employer or a postgraduate student of an affiliated institution which is paying any applicable article publishing charge ("APC") for Open Access articles. Where the Submitting Author wishes to make the Work available on an Open Access basis (and intends to pay the relevant APC), the terms of reuse of such Open Access shall be governed by a Creative Commons licence – details of these licences and which [Creative Commons](#) licence will apply to this Work are set out in our licence referred to above.

Other than as permitted in any relevant BMJ Author's Self Archiving Policies, I confirm this Work has not been accepted for publication elsewhere, is not being considered for publication elsewhere and does not duplicate material already published. I confirm all authors consent to publication of this Work and authorise the granting of this licence.



1  
2  
3 **Clinical and biological determinants of P-wave duration: Cross-sectional data**  
4  
5  
6 **from the population-based CoLaus | PsyColaus-study**  
7

8  
9 *Federica Bocchi<sup>1</sup>, Pedro Marques-Vidal<sup>1</sup>, Etienne Pruvot<sup>2</sup>, Gérard Waeber<sup>1</sup>, Peter Vollenweider<sup>1</sup>, David*  
10  
11 *Gachoud<sup>1</sup>*

12  
13 <sup>1</sup>*Department of Internal Medicine, Lausanne University Hospital (CHUV) and University of Lausanne,*  
14  
15 *Lausanne, Switzerland.*

16  
17 <sup>2</sup>*Department of Cardiology, Lausanne University Hospital (CHUV) and University of Lausanne,*  
18  
19 *Lausanne, Switzerland.*

20  
21  
22  
23  
24 **Author's emails**

25  
26 Federica Bocchi federica.bocchi@ticino.com  
27  
28 Pedro Marques-Vidal Pedro-Manuel.Marques-Vidal@chuv.ch  
29  
30 Etienne Pruvot Etienne.Pruvot@chuv.ch  
31  
32 Gérard Waeber Gerard.Waeber@chuv.ch  
33  
34 Peter Vollenweider Peter.Vollenweider@chuv.ch  
35  
36 David Gachoud David.Gachoud@chuv.ch  
37  
38  
39  
40  
41

42 **Address for corresponding author:**

43  
44 Federica Bocchi  
45  
46 Lausanne University Hospital  
47  
48 Rue du Bugnon 46  
49  
50 1011 Lausanne, Switzerland  
51  
52 Phone: +41 76 679 54 86  
53  
54 Email: federica.bocchi@ticino.com  
55  
56  
57  
58  
59

60 **Word count:** 2850

**ABSTRACT**

**Objectives:** P-wave duration (PWD) is associated with the development of atrial arrhythmias, cardiovascular (CV) and all-cause mortality. With this study, we aimed to assess the distribution and determinants of PWD in the general population.

**Design:** Cross-sectional study using data collected between 2014 and 2016.

**Setting:** In the population-based cohort CoLaus|PsyColaus, Lausanne, Switzerland, we used 12-lead electrocardiograms (ECGs) to measure PWD. Potential demographic, clinical and biological determinants of PWD were collected by questionnaire, anthropometry, blood pressure measurement and biological assays.

**Participants:** Data from 3459 participants (55% women, 62±10 years, 93% Caucasian) were included. Participants were excluded if they presented 1) no sinus rhythm or paced rhythm on the study ECG or Wolff-Parkinson-White ECG pattern; 2) missing or non-interpretable ECG and 3) missing phenotypic data.

**Primary outcome measure:** Determine 1) the PWD distribution and 2) the demographic, clinical and biological determinants of PWD in a large population-based cohort.

**Results:** Median and interquartile range of PWD was 112 [102-120] ms (milliseconds). In the multivariable analyses, PWD was significantly associated with age ( $p<0.001$ ) and height ( $p<0.001$ ), with an adjusted regression coefficient (95% CI) of 0.29 ms/years (0.23-0.36) and 0.32 ms/cm (0.28-0.37), respectively. PWD, given thereafter in ms with adjusted mean ± standard error, was significantly ( $p<0.05$ ) associated with (a) gender (woman 110.0±0.4; man 112.1±0.4), (b) body mass index (normal 110.1±0.4; overweight 110.9±0.4; obese 113.0±0.5), (c) abdominal obesity (no 110.5±0.3; yes 111.7±0.4) and (d) hypertension (no 110.4±0.3; yes 111.7±0.4).

**Conclusion:** PWD is positively associated with age, height, male gender, obesity markers and hypertension. Clinical interpretation of PWD should take these factors into consideration.

**Keywords:** Epidemiology; cross-sectional; P-wave duration; obesity; risk factors.

## STRENGTHS AND LIMITATIONS OF THIS STUDY

- This study evaluated the association between P-wave duration (PWD) and demographic, clinical or biological variables in a general population setting.
- A large number of covariates possibly associated with the PWD were analyzed.
- The study was conducted in a population-based sample allowing for the generalization of the results to similar Caucasian populations.
- Not having a published consensus about the measurement of PWD represents a limit of this study.

## INTRODUCTION

P-wave duration (PWD) has received increasing attention during the past decades because of its association with the development of atrial arrhythmias (e.g. atrial fibrillation and flutter),<sup>(1, 2)</sup> as well as cardiovascular (CV) and all-cause mortality.<sup>(3)</sup> A prolonged PWD may reflect the presence of structural cardiac abnormalities (atrial inflammation, fibrosis), which lead to impairment in atrial conduction and interatrial conduction in particular. The latter may promote the development of an interatrial block, reflecting the conduction delay through specific myocardic fibers connecting both atria and known as the Bachmann bundle.<sup>(3–5)</sup> Interatrial block is characterized by a PWD  $\geq 120$  ms and a bimodal morphology; it is a distinct entity from left atrial enlargement, although they can be associated.<sup>(2, 4)</sup> Therefore, PWD measured on a baseline electrocardiogram (ECG), a non-invasive and easily obtained tool, can be considered as a marker of structural changes affecting the atrial tissue.<sup>(6)</sup>

Many studies associated PWD with aging<sup>(6–8)</sup> and male gender.<sup>(6)</sup> Moreover, hypertension and obesity cause left ventricular hypertrophy, subsequent ventricular diastolic dysfunction and atrial enlargement, and have been linked to prolonged PWD.<sup>(3, 9)</sup> Finally, diabetes is also associated with atrial structural changes, such as fibrosis and dysregulation of connexin protein expression, both affecting PWD.<sup>(7)</sup> Hence, the identification of the demographic, clinical and biological factors

1  
2  
3 associated with a prolonged PWD could be used to detect people at risk of arrhythmia and adverse  
4  
5 CV outcomes. Such detection offers the chance to reduce the risk of stroke and heart failure and  
6  
7 possibly to lower mortality rates.(10) Yet, limited information is available on the influence of each  
8  
9 determinant on the prolongation of PWD. Although PWD cut-offs of 110-120 ms (milliseconds) have  
10  
11 been proposed, no standard value of PWD has been defined in an unselected population. We used  
12  
13 data from CoLaus|PsyColaUS cohort to determine 1) the PWD distribution and 2) the demographic,  
14  
15 clinical and biological determinants of PWD.  
16  
17  
18  
19  
20

## 21 **METHODS**

### 22 **Study population and design**

23  
24  
25 The CoLaus|PsyColaUS study is a population-based study investigating the clinical, biological  
26  
27 and genetic determinants of CV diseases. The sampling strategy and its aims have been described in  
28  
29 details elsewhere.(11) In summary, a non-stratified, representative sample of the population of  
30  
31 Lausanne, Switzerland, was recruited between 2003 and 2006, including 6733 participants. The  
32  
33 following inclusion criteria were applied: a) aged between 35 and 75 years; b) written informed  
34  
35 consent; c) willingness to take part in the examination and to provide blood samples. Participants  
36  
37 were invited to attend the Lausanne University Hospital for data collection at baseline and  
38  
39 subsequent follow-ups. Each visit included a health questionnaire, a physical examination, and blood  
40  
41 tests.  
42  
43  
44

45  
46 The first follow-up visit was conducted between April 2009 and September 2012 and the  
47  
48 second follow-up visit between May 2014 and April 2017. Mean follow-up time was 10.7 (range 8.8-  
49  
50 13.6) years for the second follow-up. As ECG data was only collected during the second follow-up,  
51  
52 only data collected during the second follow-up was considered.  
53

### 54 **Electrocardiography**

55  
56 Standard 12-lead ECGs were recorded in resting supine position at 10 mm/mV calibration  
57  
58 and paper speed of 25 mm/s on a Cardiovit MS-2015 electrocardiograph (Schiller AG, Baar,  
59  
60

1  
2  
3 Switzerland). Digital ECGs were stored in an anonymised database of SEMA Data Management  
4 System (V3.5, Schiller AG, Baar, Switzerland). ECG measurements, including PWD values, were  
5  
6 automatically determined in ms by Schiller AG algorithms based on all 12-leads and the  
7  
8 reconstitution of an average beat.<sup>(12)</sup> A former work demonstrated a good concordance between  
9  
10 PWD calculated by Schiller's algorithm and manually measured PWD.<sup>(13)</sup> Therefore, calculated PWD  
11  
12 values were used as references for this study, with two exceptions requiring a manual determination  
13  
14 of PWD. The first one included ECGs for which the algorithm was unable to provide a PWD value (e.g.  
15  
16 artefacted ECGs, unstable baseline, inverted electrodes). The second one pertained to extreme  
17  
18 values of automatically calculated PWD (< 80 ms (< 2 standard deviation) or > 150 ms (> 2 standard  
19  
20 deviation)), as it has been shown that such extreme values are often inaccurate.<sup>(13)</sup> When required,  
21  
22 PWD was manually calculated in ms by two investigators (FB and EP). PWD was measured from the  
23  
24 beginning of the P-wave defined as the point where the first atrial deflection departs from the  
25  
26 isoelectric line and the end of the P-wave defined as the point where the atrial deflection returns to  
27  
28 the isoelectric line. The two investigators identified the ECG lead where the measure would be the  
29  
30 most accurate and the mean PWD value from the two investigators was used.  
31  
32  
33  
34  
35

### 36 **Covariates**

37  
38 Lifestyle and socio-demographic data were collected using self-filled questionnaires.  
39  
40 Participants were separated into two ethnic groups: Caucasian and other. Smoking status was  
41  
42 defined as never, former, and current smokers. Alcohol consumption was categorized into non-  
43  
44 drinkers, low risk (1-13 units/week), medium risk (14-27 units/week) and high risk (> 28 units/week).  
45  
46 Personal and family history of CV diseases (myocardial infarction, angina pectoris, percutaneous  
47  
48 revascularization or coronary bypass grafting, stroke or transient ischemic attack), the use of tricyclic  
49  
50 antidepressants were also collected in the questionnaire. Details on anthropometric, blood pressure,  
51  
52 and biological measures are described in the Appendix.  
53  
54  
55  
56  
57  
58  
59  
60

### Exclusion criteria

Participants were excluded from the analysis if they presented 1) no sinus rhythm or paced rhythm on the study ECG or Wolff-Parkinson-White ECG pattern (present on the digital or manual analysis); 2) missing or non-interpretable ECG (artefacted, unstable baseline, inverted electrodes) and 3) missing phenotypic data.

### Patient and public involvement

No patients or public were involved in this study design, conduct or analysis.

### Statistical analyses

Statistical analyses were performed using Stata version 15.1 for windows (Stata Corporation, College Station, Texas, USA). Results were expressed as number of participants (percentage) for categorical data and mean  $\pm$  standard deviation or percentiles (10<sup>th</sup>, 25<sup>th</sup>, 50<sup>th</sup>, 75<sup>th</sup> and 90<sup>th</sup>) for continuous data.

T-test for continuous variables and chi-square for categorical variables were used to compare included and excluded participants as well as participants with a PWD  $<$  or  $\geq$  120 ms. The bivariate associations between PWD and continuous variables were assessed through simple linear regression. The bivariate associations between PWD and categorical variables were assessed using Kruskal-Wallis test.

Variables significantly associated with PWD in the bivariate analysis were then carried forward for multivariable analysis. The multivariable analysis was conducted using analysis of variance, and two models were applied. Model 1 was applied for each individual variable significantly associated with PWD in the bivariate analysis and adjusted for age, height and gender. Model 2 included all variables significantly associated with PWD in Model 1, including age, height and gender. As body mass index (BMI) and abdominal obesity categories were closely related, analyses were conducted separately for each marker (Models 2A and 2B for BMI and waist circumference, respectively). Results were expressed as multivariable-adjusted mean  $\pm$  standard error for categorical values and as adjusted regression coefficient for continuous variables. As a sensitivity analysis,

1  
2  
3 multivariable analysis was repeated after exclusion of all the ECGs that required a manual  
4  
5 determination of PWD. A two-tailed  $p < 0.05$  was considered statistically significant.  
6  
7  
8

## 9 **RESULTS**

### 10 **Selection procedure and characteristics of participants**

11  
12  
13  
14 Of the initial 4881 participants at the second follow-up, 3459 (70.9%) were included. The  
15 selection procedure is summarized in Figure 1. The majority of participants were Caucasian and 55%  
16 were women. Mean ( $\pm$ SD) age and BMI were  $62\pm 10$  years and  $26.4\pm 4.6$  kg/m<sup>2</sup>, respectively. 70% of  
17 the participants had dyslipidaemia, 45% had hypertension, 19% smoked and 8.5% were diabetic. 28%  
18 presented with metabolic syndrome and 9% reported a previous history of CV disease.  
19  
20  
21  
22  
23

24  
25 The characteristics of the excluded population and comparison between participants with  
26 PWD  $< 120$  and  $\geq 120$  ms are shown in the Appendix in Supplemental Table 1 and Supplemental  
27 Table 2, respectively. Significant differences between both populations were observed for age, BMI  
28 categories, alcohol use, personal history of CV diseases, hypertension, dyslipidemia, diabetes, renal  
29 failure, as well as for blood levels of troponin and NT-pro-BNP.  
30  
31  
32  
33  
34  
35

### 36 **PWD measure and distribution**

37  
38  
39 A total of 351 ECGs, i.e. 10% of the ECGs, needed a manual determination of PWD according  
40 to the previously mentioned criteria: 101 (29%) for extreme automatically calculated PWD ( $>$  or  $<$  2  
41 SD), and 250 (71%) for automatic assessment inability. The PWD distribution in the overall sample is  
42 illustrated in Figure 2; median and [interquartile range] of PWD were 112 [102-120] ms. Prevalence  
43 of PWD  $\geq 120$  ms was 21% (confidence interval: 20-23%).  
44  
45  
46  
47  
48  
49

### 50 **Association of PWD with demographic, clinical and biological markers**

51  
52  
53 The bivariate associations between PWD and the demographic, clinical, biological markers of  
54 interest are summarized in Table 1 (categorical and continuous variables). Longer PWD were found in  
55 elderly; in men; in participants with increased BMI or waist circumference; in former smokers; in  
56 participants with increased alcohol consumption, hypertension, dyslipidemia, diabetes, metabolic  
57  
58  
59  
60

1  
2  
3 syndrome or renal failure; in participants with a personal history of CV disease; in participants with  
4  
5 higher levels of troponin or NT-proBNP. Figures 3a and 3b illustrate the linear and positive  
6  
7 association of PWD with age and height, respectively. Supplemental Figure 1 shows mean values of  
8  
9 PWD in males and females by age.  
10  
11  
12  
13

14 **Table 1.** Baseline characteristics of the study population and bivariate associations between P-wave  
15 duration and different demographic, clinical and biological markers, CoLaus|PsyColaus study,  
16  
17 Lausanne, Switzerland, 2014-2016.  
18  
19  
20

|                   | N           | P-wave duration (ms) |     |     |     |     | p-value |
|-------------------|-------------|----------------------|-----|-----|-----|-----|---------|
|                   |             | 10%                  | 25% | 50% | 75% | 90% |         |
| <b>All</b>        | 3459 (100%) | 94                   | 102 | 112 | 120 | 128 |         |
| Age group         |             |                      |     |     |     |     |         |
| 40-49             | 441 (12.7)  | 88                   | 98  | 108 | 116 | 122 | <0.001  |
| 50-59             | 1189 (34.4) | 94                   | 102 | 110 | 118 | 124 |         |
| 60-69             | 975 (28.2)  | 96                   | 104 | 112 | 120 | 128 |         |
| 70-79             | 704 (20.4)  | 96                   | 104 | 114 | 124 | 132 |         |
| 80+               | 150 (4.3)   | 101                  | 108 | 118 | 126 | 134 |         |
| Gender            |             |                      |     |     |     |     | <0.001  |
| Men               | 1543 (44.6) | 98                   | 106 | 114 | 122 | 132 |         |
| Women             | 1916 (55.4) | 90                   | 100 | 110 | 118 | 124 |         |
| Race/ethnicity    |             |                      |     |     |     |     | 0.155   |
| Other             | 257 (7.4)   | 92                   | 102 | 110 | 118 | 126 |         |
| Caucasian         | 3202 (92.6) | 94                   | 102 | 112 | 120 | 128 |         |
| BMI categories    |             |                      |     |     |     |     | <0.001  |
| Normal            | 1405 (40.6) | 92                   | 102 | 110 | 118 | 126 |         |
| Overweight        | 1415 (40.9) | 94                   | 104 | 112 | 120 | 128 |         |
| Obese             | 639 (18.5)  | 94                   | 104 | 114 | 122 | 130 |         |
| Abdominal obesity |             |                      |     |     |     |     | <0.001  |
| No                | 2160 (62.5) | 94                   | 102 | 110 | 118 | 126 |         |
| Yes               | 1298 (37.5) | 92                   | 104 | 112 | 122 | 130 |         |
| Smoking           |             |                      |     |     |     |     | 0.004   |
| Never             | 1455 (42.1) | 92                   | 102 | 110 | 120 | 128 |         |
| Former            | 1349 (39.0) | 94                   | 104 | 112 | 120 | 130 |         |
| Current           | 655 (18.9)  | 94                   | 102 | 110 | 118 | 126 |         |
| Alcohol use       |             |                      |     |     |     |     | <0.001  |
| Non drinker       | 908 (26.3)  | 90                   | 100 | 110 | 120 | 128 |         |
| Low risk          | 2076 (60.0) | 94                   | 102 | 112 | 120 | 128 |         |
| Medium risk       | 386 (11.2)  | 98                   | 104 | 114 | 122 | 130 |         |



1  
2  
3  
4  
5  
6  
7  
8  
9  
10  
11  
12  
13  
14  
15  
16  
17  
18  
19  
20  
21  
22  
23  
24  
25  
26  
27  
28  
29  
30  
31  
32  
33  
34  
35  
36  
37  
38  
39  
40  
41  
42  
43  
44  
45  
46  
47  
48  
49  
50  
51  
52  
53  
54  
55  
56  
57  
58  
59  
60

|                            |             |    |     |     |     |     |        |
|----------------------------|-------------|----|-----|-----|-----|-----|--------|
| High risk                  | 89 (2.6)    | 98 | 106 | 116 | 122 | 130 |        |
| Personal history of CVD    |             |    |     |     |     |     | 0.003  |
| No                         | 3150 (91.1) | 94 | 102 | 112 | 120 | 128 |        |
| Yes                        | 309 (8.9)   | 94 | 104 | 112 | 124 | 132 |        |
| Family history for CVD     |             |    |     |     |     |     | 0.119  |
| No                         | 2115 (61.1) | 94 | 104 | 112 | 120 | 128 |        |
| Yes                        | 1344 (38.9) | 92 | 102 | 110 | 120 | 128 |        |
| Hypertension               |             |    |     |     |     |     | <0.001 |
| No                         | 1915 (55.4) | 92 | 102 | 110 | 118 | 124 |        |
| Yes                        | 1544 (44.6) | 96 | 106 | 114 | 122 | 130 |        |
| Dyslipidaemia              |             |    |     |     |     |     | 0.004  |
| No                         | 1015 (29.3) | 92 | 102 | 110 | 120 | 126 |        |
| Yes                        | 2444 (70.7) | 94 | 104 | 112 | 120 | 128 |        |
| Diabetes                   |             |    |     |     |     |     | 0.012  |
| No                         | 3160 (91.5) | 94 | 102 | 112 | 120 | 128 |        |
| Yes                        | 294 (8.5)   | 94 | 104 | 112 | 122 | 132 |        |
| Metabolic syndrome         |             |    |     |     |     |     | <0.001 |
| No                         | 2503 (72.4) | 94 | 102 | 110 | 120 | 126 |        |
| Yes                        | 955 (27.6)  | 94 | 104 | 112 | 122 | 132 |        |
| Renal failure              |             |    |     |     |     |     | 0.006  |
| No                         | 3086 (89.2) | 94 | 102 | 112 | 120 | 128 |        |
| Yes                        | 373 (10.8)  | 94 | 104 | 112 | 122 | 130 |        |
| Antidepressant medications |             |    |     |     |     |     | 0.860  |
| No                         | 3424 (99.0) | 94 | 102 | 112 | 120 | 128 |        |
| Yes                        | 35 (1.0)    | 92 | 100 | 112 | 120 | 126 |        |
| Troponin $\geq 14$ ng/L    |             |    |     |     |     |     | <0.001 |
| No                         | 2311 (91.1) | 94 | 104 | 112 | 120 | 130 |        |
| Yes                        | 226 (8.9)   | 94 | 106 | 118 | 126 | 136 |        |
| CRP $\geq 5$ mg/L          |             |    |     |     |     |     | 0.354  |
| No                         | 3174 (91.8) | 94 | 102 | 112 | 120 | 128 |        |
| Yes                        | 285 (8.2)   | 96 | 104 | 112 | 120 | 126 |        |
| NT-proBNP $\geq 125$ ng/L  |             |    |     |     |     |     | <0.001 |
| No                         | 1450 (67.4) | 92 | 102 | 110 | 118 | 126 |        |
| Yes                        | 702 (32.6)  | 92 | 104 | 112 | 122 | 132 |        |

Abbreviations: ms, milliseconds; BMI, Body Mass Index; CVD, cardiovascular disease. Please refer to the methods and Appendix for the definition of each characteristic. Results are expressed as deciles or quartiles. Between-group comparisons performed using non-parametric Kruskal-Wallis test.

The multivariable associations of PWD with the demographic, clinical and biological markers are summarized in Table 2. After adjusting for age, height and gender in the Model 1, only BMI categories, abdominal obesity and hypertension remained significantly associated with PWD. Even

1  
2  
3 after inclusion of all variables in the Model 2, age, height, gender, obesity markers (BMI or abdominal  
4 obesity) and hypertension were significantly associated with PWD. These statistically significant  
5  
6 associations were confirmed for both Models even after exclusion of manually analysed ECGs.  
7  
8

9  
10 Results are presented in Supplemental Table 3 of the Appendix.  
11  
12  
13  
14  
15  
16  
17  
18  
19  
20  
21  
22  
23  
24  
25  
26  
27  
28  
29  
30  
31  
32  
33  
34  
35  
36  
37  
38  
39  
40  
41  
42  
43  
44  
45  
46  
47  
48  
49  
50  
51  
52  
53  
54  
55  
56  
57  
58  
59  
60

For peer review only

**Table 2.** Multivariable associations between P-wave duration and different demographic, clinical and biological markers, CoLaus|PsyColaus study, Lausanne, Switzerland, 2014-2016.

| Characteristics         | Model 1     | P-value | Model 2A           | P-value | Model 2B           | P-value |
|-------------------------|-------------|---------|--------------------|---------|--------------------|---------|
| Age (continuous)        | -           |         | 0.32 (0.28 - 0.37) | <0.001  | 0.31 (0.26 - 0.36) | <0.001  |
| Height (continuous)     | -           |         | 0.29 (0.23 - 0.36) | <0.001  | 0.27 (0.21 - 0.34) | <0.001  |
| Gender                  |             |         |                    | <0.001  |                    | <0.001  |
| Woman                   | -           |         | 110.0 ± 0.4        |         | 109.8 ± 0.4        |         |
| Man                     | -           |         | 112.1 ± 0.4        |         | 112.4 ± 0.4        |         |
| BMI categories          |             | <0.001  |                    | <0.001  |                    |         |
| Normal                  | 109.9 ± 0.4 |         | 110.1 ± 0.4        |         |                    |         |
| Overweight              | 110.9 ± 0.3 |         | 110.9 ± 0.4        |         |                    |         |
| Obese                   | 113.2 ± 0.5 |         | 113.0 ± 0.5        |         |                    |         |
| Abdominal obesity       |             | <0.001  |                    |         |                    | 0.016   |
| No                      | 110.4 ± 0.3 |         |                    |         | 110.5 ± 0.3        |         |
| Yes                     | 112.0 ± 0.4 |         |                    |         | 111.7 ± 0.4        |         |
| Smoking                 |             | 0.628   |                    |         |                    |         |
| Never                   | 111.0 ± 0.3 |         | -                  |         | -                  |         |
| Former                  | 111.1 ± 0.4 |         | -                  |         | -                  |         |
| Current                 | 110.5 ± 0.5 |         | -                  |         | -                  |         |
| Alcohol use             |             | 0.859   |                    |         |                    |         |
| Non drinker             | 110.7 ± 0.4 |         | -                  |         | -                  |         |
| Low risk                | 110.9 ± 0.3 |         | -                  |         | -                  |         |
| Medium risk             | 111.4 ± 0.7 |         | -                  |         | -                  |         |
| High risk               | 111.6 ± 1.4 |         | -                  |         | -                  |         |
| Personal history of CVD |             | 0.925   |                    |         |                    |         |

|    |                   |             |        |             |       |             |
|----|-------------------|-------------|--------|-------------|-------|-------------|
| 1  |                   |             |        |             |       |             |
| 2  |                   |             |        |             |       |             |
| 3  | No                | 110.9 ± 0.2 |        | -           |       | -           |
| 4  | Yes               | 111.0 ± 0.8 |        | -           |       | -           |
| 5  |                   |             |        |             |       |             |
| 6  | Hypertension      |             | <0.001 |             | 0.010 | 0.002       |
| 7  | No                | 110.1 ± 0.3 |        | 110.4 ± 0.3 |       | 110.3 ± 0.3 |
| 8  | Yes               | 112.0 ± 0.3 |        | 111.7 ± 0.4 |       | 111.8 ± 0.4 |
| 9  |                   |             |        |             |       |             |
| 10 | Dyslipidaemia     |             | 0.318  |             |       |             |
| 11 | No                | 110.6 ± 0.4 |        | -           |       | -           |
| 12 | Yes               | 111.1 ± 0.3 |        | -           |       | -           |
| 13 |                   |             |        |             |       |             |
| 14 | Diabetes          |             | 0.548  |             |       |             |
| 15 | No                | 111.0 ± 0.2 |        | -           |       | -           |
| 16 | Yes               | 110.5 ± 0.8 |        | -           |       | -           |
| 17 |                   |             |        |             |       |             |
| 18 | Metabolic         |             | 0.113  |             |       |             |
| 19 | syndrome          |             |        |             |       |             |
| 20 | No                | 110.7 ± 0.3 |        | -           |       | -           |
| 21 | Yes               | 111.5 ± 0.4 |        | -           |       | -           |
| 22 |                   |             |        |             |       |             |
| 23 | Renal failure     |             | 0.866  |             |       |             |
| 24 | No                | 111.0 ± 0.2 |        | -           |       | -           |
| 25 | Yes               | 110.8 ± 0.7 |        | -           |       | -           |
| 26 |                   |             |        |             |       |             |
| 27 | Troponin ≥14 ng/L |             | 0.920  |             |       |             |
| 28 | No                | 112.4 ± 0.3 |        | -           |       | -           |
| 29 | Yes               | 112.5 ± 1.0 |        | -           |       | -           |
| 30 |                   |             |        |             |       |             |
| 31 | NT-proBNP ≥125    |             | 0.310  |             |       |             |
| 32 | ng/L              |             |        |             |       |             |
| 33 | No                | 110.5 ± 0.4 |        | -           |       | -           |
| 34 | Yes               | 111.2 ± 0.5 |        | -           |       | -           |
| 35 |                   |             |        |             |       |             |
| 36 |                   |             |        |             |       |             |

-, not included in the model. BMI, Body Mass Index; CVD, cardiovascular disease. Please refer to the methods and Appendix for the definition of each characteristic. Results are expressed as adjusted coefficient (95% confidence interval) for continuous variables and as mean ± standard error for categorical variables. Model 1: adjusted for age (continuous), height (continuous) and gender. Full model (2A and 2B): including all variables indicated.

## DISCUSSION

To our knowledge, this is the first study assessing the PWD and its demographic, clinical and biological determinants in the Swiss population. On a study sample of 3459 participants, we found that age, height, gender, obesity markers and hypertension were associated with PWD. Moreover, we attested that 21% of the study population had a PWD  $\geq 120$  ms, possibly reflecting an interatrial block, which is in line with other population-based studies.(1, 2)

### PWD and age

We found that aging was associated with prolonged PWD, a finding also reported by others in several studies.(3, 6, 8, 14) Electrophysiologic studies and electroanatomic mapping of the atria demonstrated abnormal conduction in older subjects,(3) which appeared to be related to atrial structural changes and to interstitial fibrosis in particular.(15) Collagenous septa separate small groups of muscular fibres, causing electrical uncoupling.(15) In addition, aging is also associated with atrial dilatation, which contributes to prolonged PWD.(16)

### PWD and height

Height has been associated with electrocardiographic modifications, particularly with the prolongation of PR interval and QRS duration.(17) Still, little is known regarding the association between height and PWD. In our study, we observed that tall individuals had longer PWD. This finding fits with the literature showing that height is a strong determinant of left atrial size, and that left atrial enlargement is associated with mechanical stress responsible for slower atrial conduction.(17)

### PWD and gender

Men had longer PWD than women, a finding also reported elsewhere.(3, 6, 8, 14) The multivariable models we used may not account for all the anthropometric differences between men and women.(8) For instance, the heart size has been shown to be greater in men than in women.(16) Other factors may play a role, such as the effect of sex hormones but there is currently a paucity of data regarding the possible effect of sex hormones on PWD.(16)

### **PWD and obesity markers**

BMI categories or abdominal obesity were positively associated with PWD, a finding also reported elsewhere.(3, 6, 18) Interestingly, obesity has well known effects on the heart, an entity known as metabolic cardiomyopathy. Obesity is responsible for structural and functional changes in cardiomyocytes independently of coronary artery disease or hypertension.(18) Regarding the metabolic cardiomyopathy, an important pathophysiological mechanism is the systemic pro-inflammatory status induced by obesity. This eventually induces low-grade inflammation in the heart with dysfunction of subcellular components (mitochondrial dysfunction; oxidative stress and impaired calcium handling), inflammatory cell infiltration and neurohumoral activation.(19) Advanced stages are characterized by apoptosis, adipocytosis, fibrosis and atrial remodelling.(19) A second important pathophysiological mechanism is the fatty acid accumulation in the cardiomyocytes. The normal heart reaches a balance between free fatty acid (FFA) uptake and oxidation. The increased level of circulating FFA observed in obesity eventually results in accumulation of lipid droplets within the cardiomyocytes, impacting cardiac function and promoting apoptosis also known as lipotoxic cardiomyopathy.(19, 20) Studies have shown an association between cardiomyocyte fat content and ECG changes including longer PWD.(18, 21)

### **PWD and hypertension**

Hypertension was positively correlated with PWD after multivariable adjustments in both models, an association also reported by others.(6, 10) Left ventricular hypertrophy and diastolic dysfunction caused by high blood pressure are responsible for increased atrial strain with subsequent dilatation and fibrosis.(10, 22) These changes have repercussions on electrical conduction and, therefore, PWD.(22)

### STUDY STRENGTHS AND LIMITATIONS

Our study was conducted in a population-based sample allowing for the generalization of the results to similar Caucasian populations. The large sample size of our study population, together with the full set of collected data, allowed us to explore associations between PWD and a number of relevant variables. All the significant associations found in our study can be easily related with underlying (patho)physiological mechanisms.

Our study has also some limitations. First, there is no published consensus about the measurement of PWD. Most studies used automated measurements provided by different softwares. Each software has its own specific algorithm susceptible to give slightly different values.<sup>(23)</sup> Second, we used the SEMA software to calculate automatically PWD values. A number of studies have included additional markers of atrial electromechanical function (i.e. P-wave indices, such as P-wave terminal force), which were not part of the results provided by the software we used. Third, a significant number of ECG (10%) needed a manual determination of PWD; this might have biased the results. However, even after exclusion of the manually analysed ECGs, associations remained unchanged.

Finally, another limitation of our study is our inability to support causal association between PWD and structural myocardial abnormalities (atrial enlargement, fibro-fatty infiltration) by the lack of anatomic-histological and echocardiographic information, which was not part of our study design.

## **FUTURE DIRECTIONS**

Considering the metabolic syndrome's burden, incidence of CV events and death will continue to be high. PWD, as an intermediate phenotype reflecting subclinical, structural and functional changes in the atria, can be a useful marker to both assess and monitor the risk of developing AF and worse CV outcomes.(1, 2, 10) Based on our results, it would be interesting to know the evolution of the participants according to their PWD. Data from echocardiography or other imaging techniques, as well as post-mortem materials, could be useful to prove the fatty or fibrotic infiltration of the atria or left atrial enlargement. Moreover, future work could determine if preventive interventions (e. g. lifestyle and dietary intervention) based on the PWD have positive effects on clinical outcomes. The ongoing follow-up of the CoLaus|PsyCoLaus cohort would provide some information in the near future.

## **CONCLUSION**

In a cross-sectional study conducted on a large sample of a population-based cohort, PWD was associated with age, height, male gender, obesity markers and hypertension. Most of these associations could possibly relate to both structural and functional changes affecting the atrial tissue.



## ACKNOWLEDGEMENTS

Nobody to acknowledge.

## OTHER REQUIRED STATEMENTS

### Contributors

FB conducted the literature search, interpreted the results and wrote the manuscript. PM-V performed the statistical analyses and contributed to write a part of the manuscript. DG interpreted the results and thoroughly revised the manuscript for important intellectual content. FB and EP calculated manually, when required, the PWD. PV and GW participated to conceiving the study. All authors have read and approved this version of the manuscript.

### Funding

This work was and is supported by research grants from GlaxoSmithKline; the Faculty of Biology and Medicine of Lausanne; and the Swiss National Science Foundation [33CSCO-122661, 33CS30-139468 and 33CS30-148401). The founding sources had no involvement in the study design, data collection, analysis and interpretation, writing of the report, or decision to submit the article for publication.

### Competing interests

None declared.

### Patient consent for publication

Not required.

### Ethics approval

The Ethics Committee of Canton Vaud ([www.cer-vd.ch](http://www.cer-vd.ch)) approved the CoLaus|PsyColaust study (reference 16/03); the approval was renewed for the first (reference 33/09) and the second (reference 26/14) follow-ups. The full decisions can be obtained from the authors upon request. The study was performed in agreement with the Helsinki declaration and in accordance with the

1  
2  
3 applicable Swiss legislation. All participants gave their signed informed consent before entering the  
4  
5 study.  
6

7 **Provenance and peer review**  
8

9  
10 Not commissioned; externally peer reviewed.  
11

12 **Data availability statement**  
13

14 Due to the sensitivity of the data and the lack of consent for online posting, individual data  
15 cannot be made accessible. Only metadata will be made available in digital repositories. Metadata  
16 requests can also be performed via the study website [www.colaus-psycholaus.ch](http://www.colaus-psycholaus.ch).  
17  
18  
19  
20  
21  
22  
23  
24  
25  
26  
27  
28  
29  
30  
31  
32  
33  
34  
35  
36  
37  
38  
39  
40  
41  
42  
43  
44  
45  
46  
47  
48  
49  
50  
51  
52  
53  
54  
55  
56  
57  
58  
59  
60

For peer review only

**REFERENCES**

1. Hari KJ, Nguyen TP, Soliman EZ. Relationship between P-wave duration and the risk of atrial fibrillation. *Expert Rev Cardiovasc Ther.* 2018;16:837-843.
2. Skov MW, Ghouse J, Kühl JT et al. Risk Prediction of Atrial Fibrillation Based on Electrocardiographic Interatrial Block. *J Am Heart Assoc.* 2018;7.
3. Magnani JW, Gorodeski EZ, Johnson VM et al. P wave duration is associated with cardiovascular and all-cause mortality outcomes: the National Health and Nutrition Examination Survey. *Heart Rhythm.* 2011;8:93-100.
4. Bayés de Luna A, Platonov P, Cosio FG et al. Interatrial blocks. A separate entity from left atrial enlargement: a consensus report. *J Electrocardiol.* 2012;45:445-451.
5. Huo Y, Mitrofanova L, Orshanskaya V et al. P-wave characteristics and histological atrial abnormality. *J Electrocardiol.* 2014;47:275-280.
6. Lehtonen AO, Langén VL, Puukka PJ et al. Incidence rates, correlates, and prognosis of electrocardiographic P-wave abnormalities - a nationwide population-based study. *J Electrocardiol.* 2017;50:925-932.
7. Magnani JW, Williamson MA, Ellinor PT et al. P wave indices: current status and future directions in epidemiology, clinical, and research applications. *Circ Arrhythm Electrophysiol.* 2009;2:72-79.
8. Havmoller R, Carlson J, Holmqvist F et al. Age-related changes in P wave morphology in healthy subjects. *BMC Cardiovasc Disord.* 2007;7:22.
9. Lehtonen AO, Puukka P, Varis J et al. Prevalence and prognosis of ECG abnormalities in normotensive and hypertensive individuals. *J Hypertens.* 2016;34:959-966.
10. Alonso A, Soliman EZ, Chen LY et al. Association of blood pressure and aortic distensibility with P wave indices and PR interval: the multi-ethnic study of atherosclerosis (MESA). *J Electrocardiol.* 2013;46:359.e1-6.

- 1  
2  
3 11. Firmann M, Mayor V, Vidal PM et al. The CoLaus study: a population-based study to  
4 investigate the epidemiology and genetic determinants of cardiovascular risk factors and metabolic  
5 syndrome. *BMC Cardiovasc Disord.* 2008;8:6.  
6  
7
- 8  
9 12. Kligfield P, Badilini F, Denjoy I et al. Comparison of automated interval measurements by  
10 widely used algorithms in digital electrocardiographs. *Am Heart J.* 2018;200:1-10.  
11  
12
- 13 13. Haefliger D, Pruvot E, Monney P et al. Validation de la mesure de la durée de l'onde P dans  
14 une étude de population. 2014.  
15  
16
- 17 14. Van der Ende MY, Siland JE, Snieder H et al. Population-based values and abnormalities of  
18 the electrocardiogram in the general Dutch population: The Lifelines Cohort Study. *Clin Cardiol.*  
19 2017;40:865-872.  
20  
21
- 22 15. Spach MS, Dolber PC. Relating extracellular potentials and their derivatives to anisotropic  
23 propagation at a microscopic level in human cardiac muscle. Evidence for electrical uncoupling of  
24 side-to-side fiber connections with increasing age. *Circ Res.* 1986;58:356-371.  
25  
26
- 27 16. Liu XK, Jahangir A, Terzic A et al. Age- and sex-related atrial electrophysiologic and structural  
28 changes. *Am J Cardiol.* 2004;94:373-375.  
29  
30
- 31 17. Kofler T, Thériault S, Bossard M et al. Relationships of Measured and Genetically Determined  
32 Height With the Cardiac Conduction System in Healthy Adults. *Circ Arrhythm Electrophysiol.* 2017;10  
33  
34
- 35 18. Babcock MJ, Soliman EZ, Ding J et al. Pericardial fat and atrial conduction abnormalities in the  
36 Multiethnic Study of Atherosclerosis (MESA). *Obesity (Silver Spring).* 2011;19:179-184.  
37  
38
- 39 19. Nishida K, Otsu K. Inflammation and metabolic cardiomyopathy. *Cardiovasc Res.*  
40 2017;113:389-398.  
41  
42
- 43 20. Alí A, Boutjdir M, Aromolaran AS. Cardiolipotoxicity, Inflammation, and Arrhythmias: Role for  
44 Interleukin-6 Molecular Mechanisms. *Front Physiol.* 2018;9:1866.  
45  
46
- 47 21. Friedman DJ, Wang N, Meigs JB et al. Pericardial fat is associated with atrial conduction: the  
48 Framingham Heart Study. *J Am Heart Assoc.* 2014;3:e000477.  
49  
50  
51  
52  
53  
54  
55  
56  
57  
58  
59  
60

- 1  
2  
3 22. Okutucu S, Aytemir K, Oto A. P-wave dispersion: What we know till now. JRSM Cardiovasc  
4 Dis. 2016;5:2048004016639443.  
5  
6  
7 23. Schläpfer J, Wellens HJ. Computer-Interpreted Electrocardiograms: Benefits and Limitations.  
8 J Am Coll Cardiol. 2017;70:1183-1192.  
9  
10  
11  
12  
13  
14  
15  
16  
17  
18  
19  
20  
21  
22  
23  
24  
25  
26  
27  
28  
29  
30  
31  
32  
33  
34  
35  
36  
37  
38  
39  
40  
41  
42  
43  
44  
45  
46  
47  
48  
49  
50  
51  
52  
53  
54  
55  
56  
57  
58  
59  
60

For peer review only

**FIGURE LEGENDS**

**Figure 1.** Selection procedure. Percentages were calculated using the baseline sample size as denominator. WPW, Wolff-Parkinson-White; ECG, electrocardiogram.

**Figure 2.** Distribution of P-wave duration in the whole sample, CoLaus|PsyColaus study, Lausanne, Switzerland, 2014-2016. ms, milliseconds.

**Figure 3. Panel A** Association between P-wave duration and age. **Panel B** Association between P-wave duration and height. The dashed blue horizontal line represents the sample mean; the red line represents the linear regression. ms, milliseconds; cm, centimetres.

1  
2  
3  
4  
5  
6  
7  
8  
9  
10  
11  
12  
13  
14  
15  
16  
17  
18  
19  
20  
21  
22  
23  
24  
25  
26  
27  
28  
29  
30  
31  
32  
33  
34  
35  
36  
37  
38  
39  
40  
41  
42  
43  
44  
45  
46  
47  
48  
49  
50  
51  
52  
53  
54  
55  
56  
57  
58  
59  
60

**A**

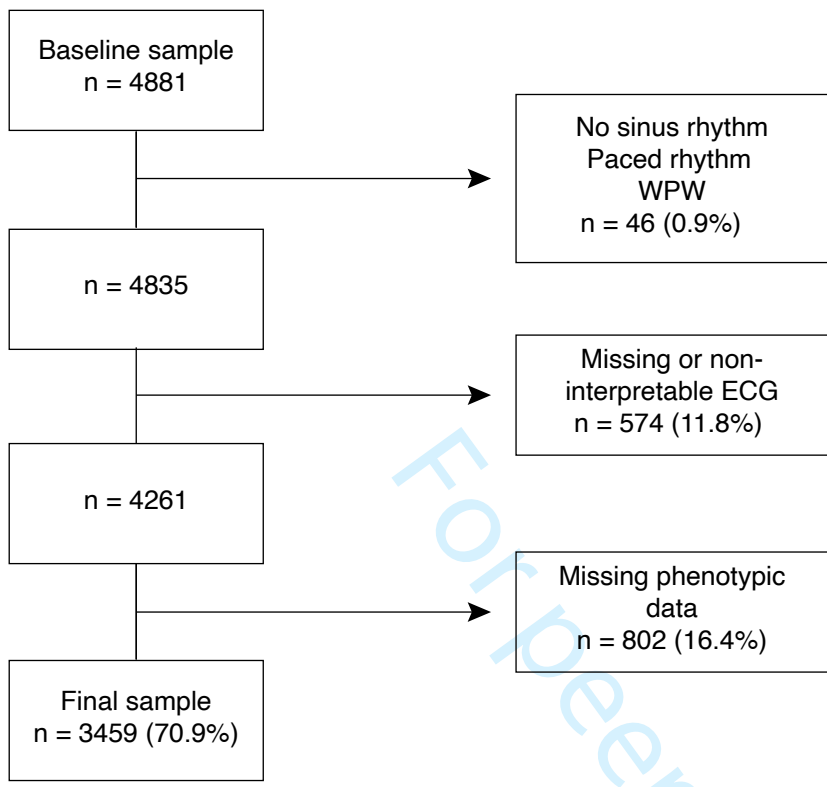

# Figure 2



View only

1  
2  
3  
4  
5  
6  
7  
8  
9  
10  
11  
12  
13  
14  
15  
16  
17  
18  
19  
20  
21  
22  
23  
24  
25  
26  
27  
28  
29  
30  
31  
32  
33  
34  
35  
36  
37  
38  
39  
40  
41  
42  
43  
44  
45  
46  
47  
48  
49  
50  
51  
52  
53  
54  
55  
56  
57  
58  
59  
60



1  
2  
3  
4  
5  
6  
7  
8  
9  
10  
11  
12  
13  
14  
15  
16  
17  
18  
19  
20  
21  
22  
23  
24  
25  
26  
27  
28  
29  
30  
31  
32  
33  
34  
35  
36  
37  
38  
39  
40  
41  
42  
43  
44  
45  
46  
47  
48  
49  
50  
51  
52  
53  
54  
55  
56  
57  
58  
59  
60

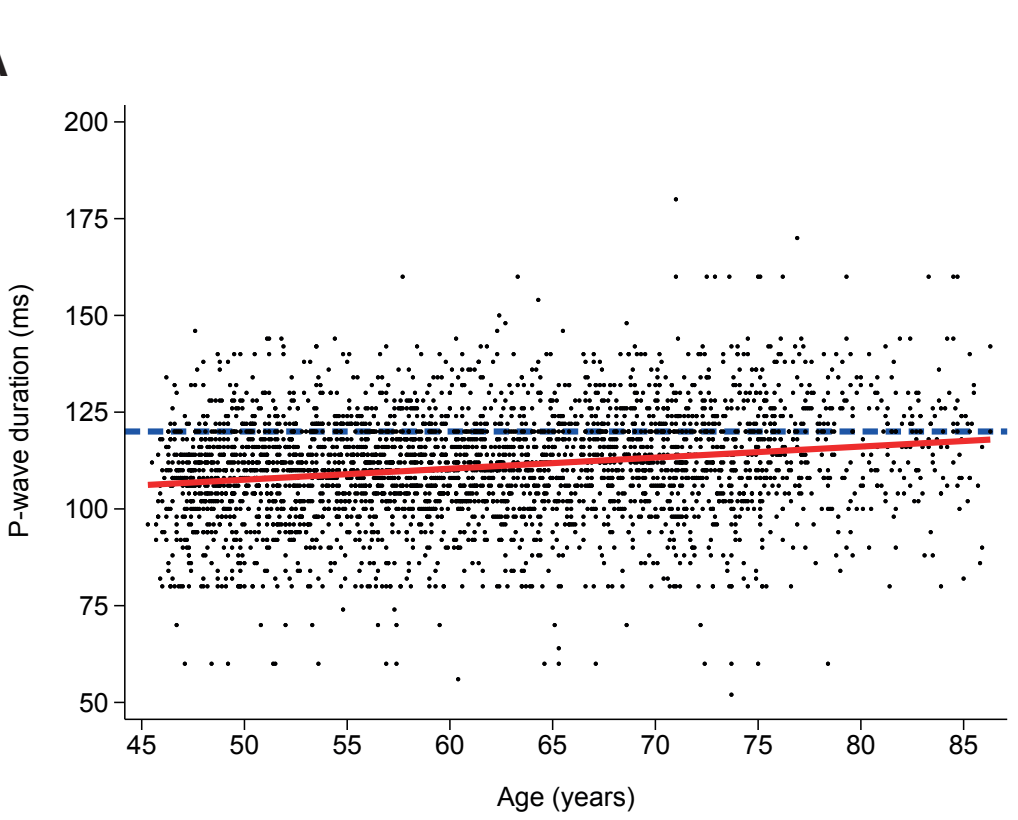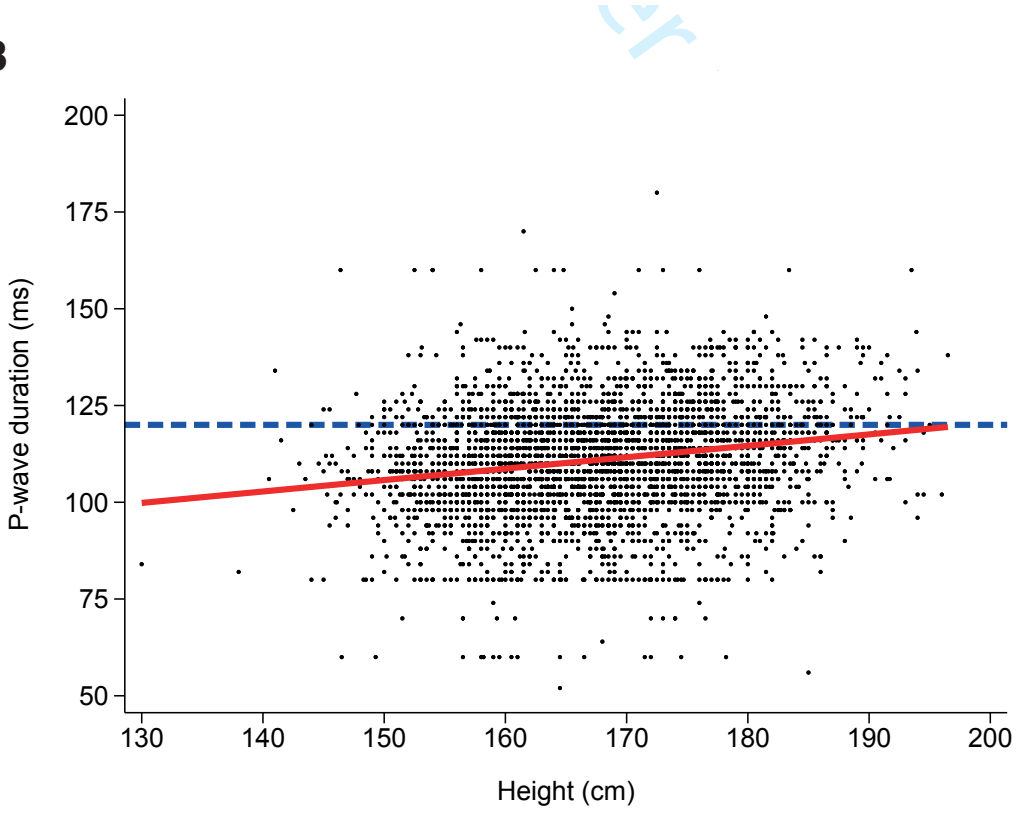

# Supplemental Figure 1

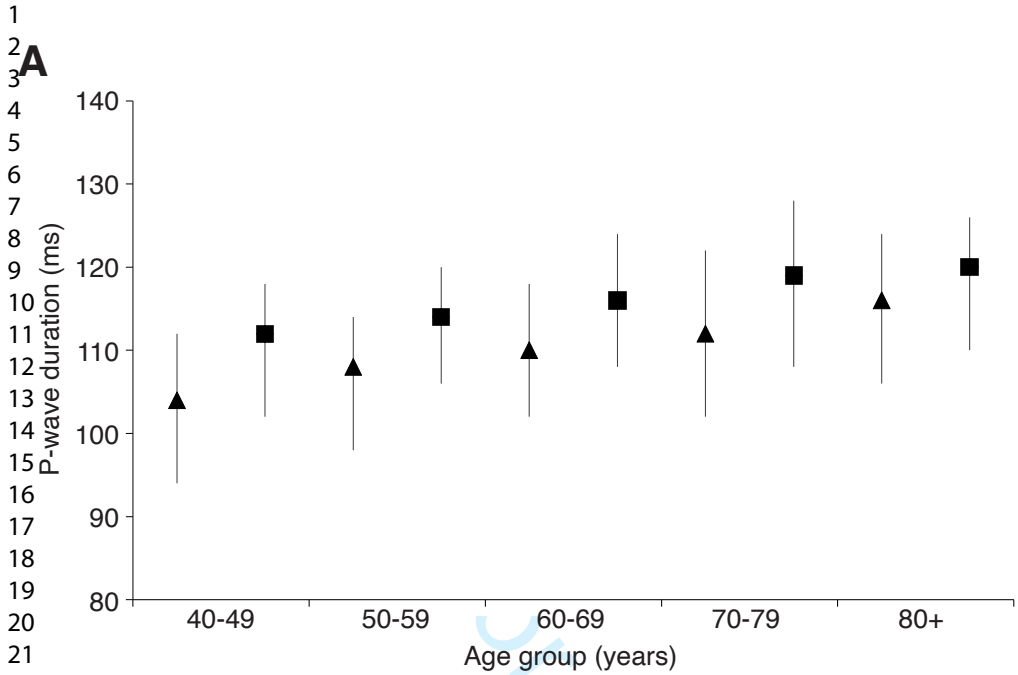

**Supplemental Figure 1.** Mean P-wave duration values of males and females by age. ms, milliseconds. Squares represent men and triangles represent women.

## APPENDIX

Anthropometric measures and blood pressure measures are described in this Appendix. It also includes a description of the methods used to determine the biological values. A specific set of references is provided for this Appendix.

Body weight and height were measured with participants standing without shoes in light indoor clothing. Weight was measured in kilograms to the nearest 0.1 kg using a Seca™ scale (Seca, Hamburg, Germany). Height was measured to the nearest 5 mm using a Seca™ height gauge (Seca, Hamburg, Germany). Body mass index (BMI) was defined as weight (kg)/height<sup>2</sup> (m<sup>2</sup>). Obesity was defined as BMI ≥ 30 kg/m<sup>2</sup>, overweight as BMI ≥ 25 and < 30 kg/m<sup>2</sup>, normal as BMI ≥ 18.5 and < 25 kg/m<sup>2</sup> and underweight as BMI < 18.5 kg/m<sup>2</sup>. Due to the small number of underweight participants (n=55), they were included in the normal category.

Waist circumference was measured mid-way between the lowest rib and the iliac crest and abdominal obesity was defined as waist circumference > 102 cm or > 88 cm for men and women respectively.(1)

Blood pressure (BP) was measured thrice on the left arm after at least 10 minutes rest in the seated position using a clinically validated automated oscillometric device (Omron® HEM-907, Matsusaka, Japan) with a standard cuff, or a large cuff if arm circumference was ≥ 33 cm. The average of the last two measurements was used. Hypertension was defined as mean systolic BP (SBP) ≥ 140 mmHg and/or a mean diastolic BP (DBP) ≥ 90 mmHg and/or use of anti-hypertensive medication.

Venous blood samples (50 mL) were drawn in the fasting state. All biological assays were performed at the clinical laboratory of the Lausanne University Hospital within 2 hours of blood collection on fresh samples. Glycated haemoglobin (HbA1c) was measured by high performance liquid chromatography (Bio-Rad, D-10™). Subjects were considered to have diabetes if they had a serum HbA1c ≥ 6.5% (≥48 nmol/mmol) and/or were taking anti-diabetic treatment.

1  
2  
3  
4  
5 Total cholesterol was measured by CHOD-PAP; HDL-cholesterol by CHOD-PAP + PEG + cyclodextrin;  
6  
7 triglycerides by GPO-PAP. In our analysis, dyslipidemia was defined as triglycerides  $\geq 2$  mmol/l and/or  
8  
9 LDL  $\geq 3$  mmol/l and/or lipid lowering treatment.

11 High sensitivity CRP was assessed by immunoassay (HS latex) and was considered elevated  
12  
13 when  $\geq 5$  mg/l. Serum and urinary creatinine were performed by the Jaffe kinetic compensated  
14  
15 method. Renal failure was considered when eGFR was  $< 60$  ml/min/1.73m<sup>2</sup> using CKD-EPI formula.  
16  
17 Troponine T hs and NT-proBNP were measured by electrochemiluminescence and considered  
18  
19 elevates when  $\geq 14$  ng/l and 125 ng/l respectively. Biological threshold were defined based on the  
20  
21 standard values in our clinical laboratory (Lausanne University Hospital). Since the threshold value for  
22  
23 a positive NT-proBNP result usually increased with age, we only considered the lowest threshold  
24  
25 value available in our laboratory (i.e. 125 ng/l), as a simple, more sensitive approach to the potential  
26  
27 effect of this variable.  
28  
29  
30  
31

32 The metabolic syndrome was retained in presence of any 3 out of 5 risk factors on the basis  
33  
34 of the JIS (Joint Interim Statement) definition. The criteria for clinical diagnosis are: elevated waist  
35  
36 circumference ( $\geq 102$  cm for men and  $\geq 88$  cm for women), elevated triglycerides ( $\geq 1.7$  mmol/l),  
37  
38 reduced HDL-C ( $< 1.0$  mmol/l for men and  $< 1.3$  mmol/l for women), elevated BP (systolic BP  $\geq 130$   
39  
40 mm Hg and/or diastolic BP  $\geq 85$  mm Hg), elevated fasting glucose ( $\geq 5.6$  mmol/l).(2)  
41  
42  
43  
44  
45  
46  
47  
48  
49  
50  
51  
52  
53  
54  
55  
56  
57  
58  
59  
60

**Supplemental Table 1.** Complete baseline characteristics of the study population, CoLaus|PsyColaus study, Lausanne, Switzerland, 2014-2016.

|                            | Included    | Excluded    | P-value |
|----------------------------|-------------|-------------|---------|
| <b>All</b>                 | 3459        | 1422        |         |
| Age in years (mean; SD)    | 62 ±10      | 65 ±11      | <0.001  |
| Gender                     |             |             |         |
| Men                        | 1543 (44.6) | 649 (45.6)  |         |
| Women                      | 1916 (55.4) | 773 (54.4)  |         |
| Race/ethnicity             |             |             |         |
| Caucasian                  | 3202 (92.6) | 1313 (92.3) |         |
| Other                      | 257 (7.4)   | 109 (7.7)   |         |
| BMI categories             |             |             | 0.005   |
| Normal                     | 1405 (40.6) | 452 (44.2)  |         |
| Overweight                 | 1415 (40.9) | 360 (35.2)  |         |
| Obese                      | 639 (18.5)  | 210 (20.6)  |         |
| Abdominal obesity          | 1298 (37.5) | 395 (38.5)  | 0.562   |
| Smoking                    |             |             | 0.952   |
| Never                      | 1455 (42.1) | 431 (41.6)  |         |
| Former                     | 1349 (39.0) | 405 (39.1)  |         |
| Current                    | 655 (18.9)  | 200 (19.3)  |         |
| Alcohol use                |             |             | <0.001  |
| Non drinker                | 908 (26.3)  | 267 (34.2)  |         |
| Low risk                   | 2076 (60.0) | 412 (52.8)  |         |
| Medium risk                | 386 (11.2)  | 87 (11.1)   |         |
| High risk                  | 89 (2.6)    | 15 (1.9)    |         |
| Personal history of CVD    | 309 (8.9)   | 209 (14.7)  | <0.001  |
| Family history of CVD      | 1344 (38.9) | 421 (29.6)  | <0.001  |
| Hypertension               | 1544 (44.6) | 719 (58.6)  | <0.001  |
| Dyslipidaemia              | 2444 (70.7) | 1064 (74.8) | 0.003   |
| Diabetes                   | 294 (8.5)   | 188 (17.1)  | <0.001  |
| Metabolic syndrome         | 955 (27.6)  | 304 (30.6)  | 0.065   |
| Renal failure              | 373 (10.8)  | 163 (15.5)  | <0.001  |
| Antidepressant medications | 35 (1.0)    | 15 (1.1)    | 0.892   |
| Troponin T > 14 ng/l       | 226 (8.9)   | 156 (19.3)  | <0.001  |
| CRP ≥ 5 mg/L               | 285 (8.2)   | 111 (15.0)  | <0.001  |
| NT-proBNP > 125 pg/ml      | 702 (32.6)  | 365 (51.3)  | <0.001  |

*SD, standard deviation; BMI, body mass index; CVD; cardiovascular disease; CRP, C-reactive protein. Please refer to the methods and Appendix for the definition of each characteristic. In column excluded, totals might not add to 1422 due to missing data. Results are expressed as mean ± standard deviation for continuous variables and as number of participants (column percentage) for*

1  
2  
3 *categorical variables. Between-group comparisons performed using t-test for continuous variables*  
4 *and chi-square for categorical variables.*  
5  
6  
7  
8  
9  
10  
11  
12  
13  
14  
15  
16  
17  
18  
19  
20  
21  
22  
23  
24  
25  
26  
27  
28  
29  
30  
31  
32  
33  
34  
35  
36  
37  
38  
39  
40  
41  
42  
43  
44  
45  
46  
47  
48  
49  
50  
51  
52  
53  
54  
55  
56  
57  
58  
59  
60

For peer review only

**Supplemental Table 2.** Characteristics of participants with P-wave duration < 120 and ≥ 120 ms, CoLaus|PsyColaus study, Lausanne, Switzerland, 2014-2016.

|                            | PWD < 120 ms | PWD ≥ 120 ms | P-value |
|----------------------------|--------------|--------------|---------|
| <b>All</b>                 | 2718         | 741          |         |
| Age in years (mean; SD)    | 61 ± 9.6     | 65.5 ± 10.2  | <0.001  |
| Gender                     |              |              | <0.001  |
| Men                        | 1110 (40.8)  | 433 (58.4)   |         |
| Women                      | 1608 (59.2)  | 308 (41.6)   |         |
| Race/ethnicity             |              |              | 0.017   |
| Caucasian                  | 2501 (92.0)  | 701 (94.6)   |         |
| Other                      | 217 (8.0)    | 40 (5.4)     |         |
| BMI categories             |              |              | <0.001  |
| Normal                     | 1157 (42.6)  | 248 (33.5)   |         |
| Overweight                 | 1106 (40.7)  | 309 (41.7)   |         |
| Obese                      | 455 (16.7)   | 184 (24.8)   |         |
| Abdominal obesity          | 960 (35.3)   | 338 (45.6)   | <0.001  |
| Smoking                    |              |              | 0.005   |
| Never                      | 1159 (42.6)  | 296 (40)     |         |
| Former                     | 1024 (37.7)  | 325 (43.9)   |         |
| Current                    | 535 (19.7)   | 120 (16.2)   |         |
| Alcohol use                |              |              | 0.146   |
| Non drinker                | 719 (26.5)   | 189 (25.5)   |         |
| Low risk                   | 1645 (60.5)  | 431 (58.2)   |         |
| Medium risk                | 288 (10.6)   | 98 (13.2)    |         |
| High risk                  | 66 (2.4)     | 23 (3.1)     |         |
| Personal history of CVD    | 210 (7.7)    | 99 (13.4)    | <0.001  |
| Family history of CVD      | 1061 (39.0)  | 283 (38.2)   | 0.676   |
| Hypertension               | 1121 (41.2)  | 423 (57.1)   | <0.001  |
| Dyslipidaemia              | 1899 (69.9)  | 545 (73.6)   | 0.051   |
| Diabetes                   | 213 (7.9)    | 81 (11.0)    | 0.007   |
| Metabolic syndrome         | 691 (25.4)   | 264 (35.6)   | <0.001  |
| Renal failure              | 267 (9.8)    | 106 (14.3)   | <0.001  |
| Antidepressant medications | 27 (1.0)     | 8 (1.1)      | 0.835   |
| Troponin T > 14 ng/l       | 140 (7.4)    | 86 (13.3)    | <0.001  |
| CRP ≥ 5 mg/L               | 219 (8.1)    | 66 (8.9)     | 0.456   |
| NT-proBNP > 125 pg/ml      | 493 (29.4)   | 209 (44.0)   | <0.001  |

*PWD, P-wave duration; ms, milliseconds; SD, standard deviation; BMI, body mass index; CVD; cardiovascular disease; CRP, C-reactive protein. Please refer to the methods and Appendix for the definition of each characteristic. Results are expressed as mean ± standard deviation or as number of participants (column percentage). Between-group comparisons performed using student t-test or chi-square.*

**Supplemental Table 3.** Multivariable associations between P-wave duration and different demographic, clinical and biological markers, CoLaus|PsyColaus study, Lausanne, Switzerland, 2014-2016. Only computer-evaluated ECGs.

| Characteristics         | Model 1     | P-value | Model 2A           | P-value | Model 2B           | P-value |
|-------------------------|-------------|---------|--------------------|---------|--------------------|---------|
| Age (continuous)        | -           |         | 0.29 (0.25 - 0.34) | <0.001  | 0.28 (0.24 - 0.33) | <0.001  |
| Height (continuous)     | -           |         | 0.27 (0.20 - 0.33) | <0.001  | 0.24 (0.18 - 0.30) | <0.001  |
| Gender                  |             |         |                    | <0.001  |                    | <0.001  |
| Woman                   | -           |         | 110.6 ± 0.3        |         | 110.3 ± 0.3        |         |
| Man                     | -           |         | 112.5 ± 0.4        |         | 112.9 ± 0.4        |         |
| BMI categories          |             | <0.001  |                    | <0.001  |                    |         |
| Normal                  | 110.3 ± 0.3 |         | 110.5 ± 0.3        |         |                    |         |
| Overweight              | 111.7 ± 0.3 |         | 111.7 ± 0.3        |         |                    |         |
| Obese                   | 113.2 ± 0.5 |         | 113.0 ± 0.5        |         |                    |         |
| Abdominal obesity       |             | <0.001  |                    |         |                    | <0.001  |
| No                      | 110.8 ± 0.3 |         |                    |         | 110.9 ± 0.3        |         |
| Yes                     | 112.6 ± 0.3 |         |                    |         | 112.4 ± 0.4        |         |
| Smoking                 |             | 0.716   |                    |         |                    |         |
| Never                   | 111.6 ± 0.3 |         | -                  |         | -                  |         |
| Former                  | 111.5 ± 0.3 |         | -                  |         | -                  |         |
| Current                 | 111.1 ± 0.5 |         | -                  |         | -                  |         |
| Alcohol use             |             | 0.875   |                    |         |                    |         |
| Non drinker             | 111.3 ± 0.4 |         | -                  |         | -                  |         |
| Low risk                | 111.4 ± 0.3 |         | -                  |         | -                  |         |
| Medium risk             | 111.9 ± 0.6 |         | -                  |         | -                  |         |
| High risk               | 111.4 ± 1.3 |         | -                  |         | -                  |         |
| Personal history of CVD |             | 0.632   |                    |         |                    |         |
| No                      | 111.5 ± 0.2 |         | -                  |         | -                  |         |



|    |                     |             |        |             |       |             |
|----|---------------------|-------------|--------|-------------|-------|-------------|
| 1  |                     |             |        |             |       |             |
| 2  |                     |             |        |             |       |             |
| 3  | Yes                 | 111.1 ± 0.7 |        | -           |       | -           |
| 4  | Hypertension        |             | <0.001 |             | 0.011 | 0.004       |
| 5  | No                  | 110.7 ± 0.3 |        | 110.9 ± 0.3 |       | 110.8 ± 0.3 |
| 6  | Yes                 | 112.4 ± 0.3 |        | 112.1 ± 0.3 |       | 112.2 ± 0.3 |
| 7  | Dyslipidaemia       |             | 0.243  |             |       |             |
| 8  | No                  | 111.1 ± 0.4 |        | -           |       | -           |
| 9  | Yes                 | 111.6 ± 0.2 |        | -           |       | -           |
| 10 | Diabetes            |             | 0.146  |             |       |             |
| 11 | No                  | 111.5 ± 0.2 |        | -           |       | -           |
| 12 | Yes                 | 110.4 ± 0.7 |        | -           |       | -           |
| 13 | Metabolic syndrome  |             | 0.064  |             |       |             |
| 14 | No                  | 111.2 ± 0.2 |        | -           |       | -           |
| 15 | Yes                 | 112.1 ± 0.4 |        | -           |       | -           |
| 16 | Renal failure       |             | 0.732  |             |       |             |
| 17 | No                  | 111.5 ± 0.2 |        | -           |       | -           |
| 18 | Yes                 | 111.2 ± 0.7 |        | -           |       | -           |
| 19 | Troponin ≥14 ng/L   |             | 0.707  |             |       |             |
| 20 | No                  | 112.8 ± 0.3 |        | -           |       | -           |
| 21 | Yes                 | 112.5 ± 0.9 |        | -           |       | -           |
| 22 | NT-proBNP ≥125 ng/L |             | 0.933  |             |       |             |
| 23 | No                  | 111.2 ± 0.3 |        | -           |       | -           |
| 24 | Yes                 | 111.3 ± 0.5 |        | -           |       | -           |

-, not included in the model. BMI, Body Mass Index; CVD, cardiovascular disease. Please refer to the methods and Appendix for the definition of each characteristic. Results are expressed as adjusted coefficient (95% confidence interval) for continuous variables and as mean ± standard error for categorical variables. Model 1: adjusted for age (continuous), height (continuous) and gender. Full model (2A and 2B): including all variables indicated.

## REFERENCES

1. National Cholesterol Education Program (NCEP) Expert Panel on Detection E, and Treatment of High Blood Cholesterol in Adults (Adult Treatment Panel III. Third Report of the National Cholesterol Education Program (NCEP) Expert Panel on Detection, Evaluation, and Treatment of High Blood Cholesterol in Adults (Adult Treatment Panel III) final report. *Circulation* 2002;106:3143-3421.
2. Alberti KG, Eckel RH, Grundy SM et al. Harmonizing the metabolic syndrome: a joint interim statement of the International Diabetes Federation Task Force on Epidemiology and Prevention; National Heart, Lung, and Blood Institute; American Heart Association; World Heart Federation; International Atherosclerosis Society; and International Association for the Study of Obesity. *Circulation* 2009;120:1640-1645.

**STROBE 2007 (v4) checklist of items to be included in reports of observational studies in epidemiology\***  
**Checklist for cohort, case-control, and cross-sectional studies (combined)**

| Section/Topic             | Item # | Recommendation                                                                                                                                                                                                                                                                                                                                                                                                                                                         | Reported on page # |
|---------------------------|--------|------------------------------------------------------------------------------------------------------------------------------------------------------------------------------------------------------------------------------------------------------------------------------------------------------------------------------------------------------------------------------------------------------------------------------------------------------------------------|--------------------|
| Title and abstract        | 1      | (a) Indicate the study's design with a commonly used term in the title or the abstract                                                                                                                                                                                                                                                                                                                                                                                 | 1                  |
|                           |        | (b) Provide in the abstract an informative and balanced summary of what was done and what was found                                                                                                                                                                                                                                                                                                                                                                    | 2                  |
| <b>Introduction</b>       |        |                                                                                                                                                                                                                                                                                                                                                                                                                                                                        |                    |
| Background/rationale      | 2      | Explain the scientific background and rationale for the investigation being reported                                                                                                                                                                                                                                                                                                                                                                                   | 3-4                |
| Objectives                | 3      | State specific objectives, including any pre-specified hypotheses                                                                                                                                                                                                                                                                                                                                                                                                      | 3-4                |
| <b>Methods</b>            |        |                                                                                                                                                                                                                                                                                                                                                                                                                                                                        |                    |
| Study design              | 4      | Present key elements of study design early in the paper                                                                                                                                                                                                                                                                                                                                                                                                                | 2                  |
| Setting                   | 5      | Describe the setting, locations, and relevant dates, including periods of recruitment, exposure, follow-up, and data collection                                                                                                                                                                                                                                                                                                                                        | 4-5                |
| Participants              | 6      | (a) <i>Cohort study</i> —Give the eligibility criteria, and the sources and methods of selection of participants. Describe methods of follow-up<br><i>Case-control study</i> —Give the eligibility criteria, and the sources and methods of case ascertainment and control selection. Give the rationale for the choice of cases and controls<br><i>Cross-sectional study</i> —Give the eligibility criteria, and the sources and methods of selection of participants | 4                  |
|                           |        | (b) <i>Cohort study</i> —For matched studies, give matching criteria and number of exposed and unexposed<br><i>Case-control study</i> —For matched studies, give matching criteria and the number of controls per case                                                                                                                                                                                                                                                 |                    |
| Variables                 | 7      | Clearly define all outcomes, exposures, predictors, potential confounders, and effect modifiers. Give diagnostic criteria, if applicable                                                                                                                                                                                                                                                                                                                               | 5                  |
| Data sources/ measurement | 8*     | For each variable of interest, give sources of data and details of methods of assessment (measurement). Describe comparability of assessment methods if there is more than one group                                                                                                                                                                                                                                                                                   | 4-5, Appendix      |
| Bias                      | 9      | Describe any efforts to address potential sources of bias                                                                                                                                                                                                                                                                                                                                                                                                              |                    |
| Study size                | 10     | Explain how the study size was arrived at                                                                                                                                                                                                                                                                                                                                                                                                                              | 4                  |
| Quantitative variables    | 11     | Explain how quantitative variables were handled in the analyses. If applicable, describe which groupings were chosen and why                                                                                                                                                                                                                                                                                                                                           | 5, Appendix        |
| Statistical methods       | 12     | (a) Describe all statistical methods, including those used to control for confounding                                                                                                                                                                                                                                                                                                                                                                                  | 6-7                |
|                           |        | (b) Describe any methods used to examine subgroups and interactions                                                                                                                                                                                                                                                                                                                                                                                                    | 6-7                |
|                           |        | (c) Explain how missing data were addressed                                                                                                                                                                                                                                                                                                                                                                                                                            |                    |
|                           |        | (d) <i>Cohort study</i> —If applicable, explain how loss to follow-up was addressed<br><i>Case-control study</i> —If applicable, explain how matching of cases and controls was addressed                                                                                                                                                                                                                                                                              |                    |

|                          |     |                                                                                                                                                                                                              |                               |
|--------------------------|-----|--------------------------------------------------------------------------------------------------------------------------------------------------------------------------------------------------------------|-------------------------------|
|                          |     | <i>Cross-sectional study</i> —If applicable, describe analytical methods taking account of sampling strategy                                                                                                 | 6-7                           |
|                          |     | (e) Describe any sensitivity analyses                                                                                                                                                                        | 6-7                           |
| <b>Results</b>           |     |                                                                                                                                                                                                              |                               |
| Participants             | 13* | (a) Report numbers of individuals at each stage of study—eg numbers potentially eligible, examined for eligibility, confirmed eligible, included in the study, completing follow-up, and analysed            | 7                             |
|                          |     | (b) Give reasons for non-participation at each stage                                                                                                                                                         | 7, Figure 1                   |
|                          |     | (c) Consider use of a flow diagram                                                                                                                                                                           | 7, Figure 1                   |
| Descriptive data         | 14* | (a) Give characteristics of study participants (eg demographic, clinical, social) and information on exposures and potential confounders                                                                     | 7, Supplemental Table 1 and 2 |
|                          |     | (b) Indicate number of participants with missing data for each variable of interest                                                                                                                          | Figure 1                      |
|                          |     | (c) <i>Cohort study</i> —Summarise follow-up time (eg, average and total amount)                                                                                                                             |                               |
| Outcome data             | 15* | <i>Cohort study</i> —Report numbers of outcome events or summary measures over time                                                                                                                          |                               |
|                          |     | <i>Case-control study</i> —Report numbers in each exposure category, or summary measures of exposure                                                                                                         |                               |
|                          |     | <i>Cross-sectional study</i> —Report numbers of outcome events or summary measures                                                                                                                           | 7-12, Table 1 and 2           |
| Main results             | 16  | (a) Give unadjusted estimates and, if applicable, confounder-adjusted estimates and their precision (eg, 95% confidence interval). Make clear which confounders were adjusted for and why they were included | 7-12, Table 1 and 2           |
|                          |     | (b) Report category boundaries when continuous variables were categorized                                                                                                                                    |                               |
|                          |     | (c) If relevant, consider translating estimates of relative risk into absolute risk for a meaningful time period                                                                                             |                               |
| Other analyses           | 17  | Report other analyses done—eg analyses of subgroups and interactions, and sensitivity analyses                                                                                                               | Supplemental Table 3          |
| <b>Discussion</b>        |     |                                                                                                                                                                                                              |                               |
| Key results              | 18  | Summarise key results with reference to study objectives                                                                                                                                                     | 13-14                         |
| Limitations              | 19  | Discuss limitations of the study, taking into account sources of potential bias or imprecision. Discuss both direction and magnitude of any potential bias                                                   | 15                            |
| Interpretation           | 20  | Give a cautious overall interpretation of results considering objectives, limitations, multiplicity of analyses, results from similar studies, and other relevant evidence                                   | 16                            |
| Generalisability         | 21  | Discuss the generalisability (external validity) of the study results                                                                                                                                        | 15                            |
| <b>Other information</b> |     |                                                                                                                                                                                                              |                               |
| Funding                  | 22  | Give the source of funding and the role of the funders for the present study and, if applicable, for the original study on which the present article is based                                                | 17                            |

\*Give information separately for cases and controls in case-control studies and, if applicable, for exposed and unexposed groups in cohort and cross-sectional studies.

1  
2 **Note:** An Explanation and Elaboration article discusses each checklist item and gives methodological background and published examples of transparent reporting. The STROBE  
3 checklist is best used in conjunction with this article (freely available on the Web sites of PLoS Medicine at <http://www.plosmedicine.org/>, Annals of Internal Medicine at  
4 <http://www.annals.org/>, and Epidemiology at <http://www.epidem.com/>). Information on the STROBE Initiative is available at [www.strobe-statement.org](http://www.strobe-statement.org).  
5  
6  
7  
8  
9  
10  
11  
12  
13  
14  
15  
16  
17  
18  
19  
20  
21  
22  
23  
24  
25  
26  
27  
28  
29  
30  
31  
32  
33  
34  
35  
36  
37  
38  
39  
40  
41  
42  
43  
44  
45  
46

For peer review only

# BMJ Open

## Clinical and biological determinants of P-wave duration: Cross-sectional data from the population-based CoLaus|PsyColaus-study

|                                 |                                                                                                                                                                                                                                                                       |
|---------------------------------|-----------------------------------------------------------------------------------------------------------------------------------------------------------------------------------------------------------------------------------------------------------------------|
| Journal:                        | <i>BMJ Open</i>                                                                                                                                                                                                                                                       |
| Manuscript ID                   | bmjopen-2020-038828.R2                                                                                                                                                                                                                                                |
| Article Type:                   | Original research                                                                                                                                                                                                                                                     |
| Date Submitted by the Author:   | 08-Aug-2020                                                                                                                                                                                                                                                           |
| Complete List of Authors:       | Bocchi, Federica; CHUV, Internal medicine<br>Marques-Vidal, Pedro; CHUV, Internal Medicine<br>Pruvot, Etienne; CHUV, Cardiology<br>Waeber, Gerard; CHUV, Internal Medicine<br>Vollenweider, Peter; CHUV, Internal Medicine<br>Gachoud, David; CHUV, Internal Medicine |
| <b>Primary Subject Heading</b>: | Cardiovascular medicine                                                                                                                                                                                                                                               |
| Secondary Subject Heading:      | Cardiovascular medicine, Epidemiology                                                                                                                                                                                                                                 |
| Keywords:                       | EPIDEMIOLOGY, Adult cardiology < CARDIOLOGY, Cardiac Epidemiology < CARDIOLOGY, Cardiology < INTERNAL MEDICINE                                                                                                                                                        |
|                                 |                                                                                                                                                                                                                                                                       |

SCHOLARONE™  
Manuscripts



I, the Submitting Author has the right to grant and does grant on behalf of all authors of the Work (as defined in the below author licence), an exclusive licence and/or a non-exclusive licence for contributions from authors who are: i) UK Crown employees; ii) where BMJ has agreed a CC-BY licence shall apply, and/or iii) in accordance with the terms applicable for US Federal Government officers or employees acting as part of their official duties; on a worldwide, perpetual, irrevocable, royalty-free basis to BMJ Publishing Group Ltd ("BMJ") its licensees and where the relevant Journal is co-owned by BMJ to the co-owners of the Journal, to publish the Work in this journal and any other BMJ products and to exploit all rights, as set out in our [licence](#).

The Submitting Author accepts and understands that any supply made under these terms is made by BMJ to the Submitting Author unless you are acting as an employee on behalf of your employer or a postgraduate student of an affiliated institution which is paying any applicable article publishing charge ("APC") for Open Access articles. Where the Submitting Author wishes to make the Work available on an Open Access basis (and intends to pay the relevant APC), the terms of reuse of such Open Access shall be governed by a Creative Commons licence – details of these licences and which [Creative Commons](#) licence will apply to this Work are set out in our licence referred to above.

Other than as permitted in any relevant BMJ Author's Self Archiving Policies, I confirm this Work has not been accepted for publication elsewhere, is not being considered for publication elsewhere and does not duplicate material already published. I confirm all authors consent to publication of this Work and authorise the granting of this licence.

1  
2  
3 **Clinical and biological determinants of P-wave duration: Cross-sectional data**  
4  
5  
6 **from the population-based CoLaus | PsyColaus-study**  
7

8  
9 *Federica Bocchi<sup>1</sup>, Pedro Marques-Vidal<sup>1</sup>, Etienne Pruvot<sup>2</sup>, Gérard Waeber<sup>1</sup>, Peter Vollenweider<sup>1</sup>, David*  
10  
11 *Gachoud<sup>1</sup>*

12  
13 <sup>1</sup>*Department of Internal Medicine, Lausanne University Hospital (CHUV) and University of Lausanne,*  
14  
15 *Lausanne, Switzerland.*

16  
17 <sup>2</sup>*Department of Cardiology, Lausanne University Hospital (CHUV) and University of Lausanne,*  
18  
19 *Lausanne, Switzerland.*

20  
21  
22  
23  
24 **Author's emails**

25  
26 Federica Bocchi federica.bocchi@ticino.com  
27  
28 Pedro Marques-Vidal Pedro-Manuel.Marques-Vidal@chuv.ch  
29  
30 Etienne Pruvot Etienne.Pruvot@chuv.ch  
31  
32 Gérard Waeber Gerard.Waeber@chuv.ch  
33  
34 Peter Vollenweider Peter.Vollenweider@chuv.ch  
35  
36 David Gachoud David.Gachoud@chuv.ch  
37  
38  
39  
40  
41

42 **Address for corresponding author:**

43  
44 Federica Bocchi  
45  
46 Lausanne University Hospital  
47  
48 Rue du Bugnon 46  
49  
50 1011 Lausanne, Switzerland  
51  
52 Phone: +41 76 679 54 86  
53  
54 Email: federica.bocchi@ticino.com  
55  
56  
57  
58  
59

60 **Word count:** 2852



**ABSTRACT**

**Objectives:** P-wave duration (PWD) is associated with the development of atrial arrhythmias, cardiovascular (CV) and all-cause mortality. With this study, we aimed to assess the distribution and determinants of PWD in the general population.

**Design:** Cross-sectional study using data collected between 2014 and 2016.

**Setting:** In the population-based cohort CoLaus|PsyColaus, Lausanne, Switzerland, we used 12-lead electrocardiograms (ECGs) to measure PWD. Potential demographic, clinical and biological determinants of PWD were collected by questionnaire, anthropometry, blood pressure measurement and biological assays.

**Participants:** Data from 3459 participants (55% women, 62±10 years, 93% Caucasian) were included. Participants were excluded if they presented 1) no sinus rhythm or paced rhythm on the study ECG or Wolff-Parkinson-White ECG pattern; 2) missing or non-interpretable ECG and 3) missing phenotypic data.

**Primary outcome measure:** Determine 1) the PWD distribution and 2) the demographic, clinical and biological determinants of PWD in a large population-based cohort.

**Results:** Median and interquartile range of PWD was 112 [102-120] ms (milliseconds). In the multivariable analyses, PWD was significantly associated with age ( $p<0.001$ ) and height ( $p<0.001$ ), with an adjusted regression coefficient (95% CI) of 0.29 ms/years (0.23-0.36) and 0.32 ms/cm (0.28-0.37), respectively. PWD, given thereafter in ms with adjusted mean ± standard error, was significantly ( $p<0.05$ ) associated with (a) gender (woman 110.0±0.4; man 112.1±0.4), (b) body mass index (normal 110.1±0.4; overweight 110.9±0.4; obese 113.0±0.5), (c) abdominal obesity (no 110.5±0.3; yes 111.7±0.4) and (d) hypertension (no 110.4±0.3; yes 111.7±0.4).

**Conclusion:** PWD is positively associated with age, height, male gender, obesity markers and hypertension. Clinical interpretation of PWD should take these factors into consideration.

**Keywords:** Epidemiology; cross-sectional; P-wave duration; obesity; risk factors.

## STRENGTHS AND LIMITATIONS OF THIS STUDY

- This study evaluated the association between P-wave duration (PWD) and demographic, clinical or biological variables in a general population setting.
- A large number of covariates possibly associated with the PWD were analyzed.
- The study was conducted in a population-based sample allowing for the generalization of the results to similar Caucasian populations.
- Not having a published consensus about the measurement of PWD represents a limit of this study.

## INTRODUCTION

P-wave duration (PWD) has received increasing attention during the past decades because of its association with the development of atrial arrhythmias (e.g. atrial fibrillation and flutter),<sup>(1–3)</sup> as well as cardiovascular (CV) and all-cause mortality.<sup>(4)</sup> A prolonged PWD may reflect the presence of structural cardiac abnormalities (atrial inflammation, fibrosis), which lead to impairment in atrial conduction and interatrial conduction in particular. The latter may promote the development of an interatrial block, reflecting the conduction delay through specific myocardic fibers connecting both atria and known as the Bachmann bundle.<sup>(4–6)</sup> Interatrial block is characterized by a PWD  $\geq$  120 ms and a bimodal morphology; it is a distinct entity from left atrial enlargement, although they can be associated.<sup>(2, 5)</sup> Therefore, PWD measured on a baseline electrocardiogram (ECG), a non-invasive and easily obtained tool, can be considered as a marker of structural changes affecting the atrial tissue.<sup>(7)</sup>

Many studies associated PWD with aging<sup>(7–9)</sup> and male gender.<sup>(7)</sup> Moreover, hypertension and obesity cause left ventricular hypertrophy, subsequent ventricular diastolic dysfunction and atrial enlargement, and have been linked to prolonged PWD.<sup>(4, 10)</sup> Finally, diabetes is also associated with atrial structural changes, such as fibrosis and dysregulation of connexin protein expression, both affecting PWD.<sup>(8)</sup> Hence, the identification of the demographic, clinical and

1  
2  
3 biological factors associated with a prolonged PWD could be used to detect people at risk of  
4  
5 arrhythmia and adverse CV outcomes. Such detection offers the chance to reduce the risk of stroke  
6  
7 and heart failure and possibly to lower mortality rates.(11) Yet, limited information is available on  
8  
9 the influence of each determinant on the prolongation of PWD. Although PWD cut-offs of 110-120  
10  
11 ms (milliseconds) have been proposed, no standard value of PWD has been defined in an unselected  
12  
13 population. We used data from CoLaus|PsyColaus cohort to determine 1) the PWD distribution and  
14  
15 2) the demographic, clinical and biological determinants of PWD.  
16  
17  
18  
19  
20

## 21 **METHODS**

### 22 **Study population and design**

23  
24 The CoLaus|PsyColaus study is a population-based study investigating the clinical, biological  
25  
26 and genetic determinants of CV diseases. The sampling strategy and its aims have been described in  
27  
28 details elsewhere.(12) In summary, a non-stratified, representative sample of the population of  
29  
30 Lausanne, Switzerland, was recruited between 2003 and 2006, including 6733 participants. The  
31  
32 following inclusion criteria were applied: a) aged between 35 and 75 years; b) written informed  
33  
34 consent; c) willingness to take part in the examination and to provide blood samples. Participants  
35  
36 were invited to attend the Lausanne University Hospital for data collection at baseline and  
37  
38 subsequent follow-ups. Each visit included a health questionnaire, a physical examination, and blood  
39  
40 tests.  
41  
42  
43  
44

45 The first follow-up visit was conducted between April 2009 and September 2012 and the  
46  
47 second follow-up visit between May 2014 and April 2017. Mean follow-up time was 10.7 (range 8.8-  
48  
49 13.6) years for the second follow-up. As ECG data was only collected during the second follow-up,  
50  
51 only data collected during the second follow-up was considered.  
52  
53

### 54 **Electrocardiography**

55  
56 Standard 12-lead ECGs were recorded in resting supine position at 10 mm/mV calibration  
57  
58 and paper speed of 25 mm/s on a Cardiovit MS-2015 electrocardiograph (Schiller AG, Baar,  
59  
60

1  
2  
3 Switzerland). Digital ECGs were stored in an anonymised database of SEMA Data Management  
4 System (V3.5, Schiller AG, Baar, Switzerland). ECG measurements, including PWD values, were  
5 automatically determined in ms by Schiller AG algorithms based on all 12-leads and the  
6 reconstitution of an average beat.<sup>(13)</sup> A former work demonstrated a good concordance between  
7 PWD calculated by Schiller's algorithm and manually measured PWD.<sup>(14)</sup> Therefore, calculated PWD  
8 values were used as references for this study, with two exceptions requiring a manual determination  
9 of PWD. The first one included ECGs for which the algorithm was unable to provide a PWD value (e.g.  
10 artefacted ECGs, unstable baseline, inverted electrodes). The second one pertained to extreme  
11 values of automatically calculated PWD (< 80 ms (< 2 standard deviation) or > 150 ms (> 2 standard  
12 deviation)), as it has been shown that such extreme values are often inaccurate.<sup>(14)</sup> When required,  
13 PWD was manually calculated in ms by two investigators (FB and EP). PWD was measured from the  
14 beginning of the P-wave defined as the point where the first atrial deflection departs from the  
15 isoelectric line and the end of the P-wave defined as the point where the atrial deflection returns to  
16 the isoelectric line. The two investigators identified the ECG lead where the measure would be the  
17 most accurate and the mean PWD value from the two investigators was used.

### 36 **Covariates**

37  
38 Lifestyle and socio-demographic data were collected using self-filled questionnaires.  
39 Participants were separated into two ethnic groups: Caucasian and other. Smoking status was  
40 defined as never, former, and current smokers. Alcohol consumption was categorized into non-  
41 drinkers, low risk (1-13 units/week), medium risk (14-27 units/week) and high risk (> 28 units/week).  
42 Personal and family history of CV diseases (myocardial infarction, angina pectoris, percutaneous  
43 revascularization or coronary bypass grafting, stroke or transient ischemic attack), the use of tricyclic  
44 antidepressants were also collected in the questionnaire. Details on anthropometric, blood pressure,  
45 and biological measures are described in the Appendix.

### Exclusion criteria

Participants were excluded from the analysis if they presented 1) no sinus rhythm or paced rhythm on the study ECG or Wolff-Parkinson-White ECG pattern (present on the digital or manual analysis); 2) missing or non-interpretable ECG (artefacted, unstable baseline, inverted electrodes) and 3) missing phenotypic data.

### Patient and public involvement

No patients or public were involved in this study design, conduct or analysis.

### Statistical analyses

Statistical analyses were performed using Stata version 15.1 for windows (Stata Corporation, College Station, Texas, USA). Results were expressed as number of participants (percentage) for categorical data and mean  $\pm$  standard deviation or percentiles (10<sup>th</sup>, 25<sup>th</sup>, 50<sup>th</sup>, 75<sup>th</sup> and 90<sup>th</sup>) for continuous data.

T-test for continuous variables and chi-square for categorical variables were used to compare included and excluded participants as well as participants with a PWD  $<$  or  $\geq$  120 ms. The bivariate associations between PWD and continuous variables were assessed through simple linear regression. The bivariate associations between PWD and categorical variables were assessed using Kruskal-Wallis test.

Variables significantly associated with PWD in the bivariate analysis were then carried forward for multivariable analysis. The multivariable analysis was conducted using analysis of variance, and two models were applied. Model 1 was applied for each individual variable significantly associated with PWD in the bivariate analysis and adjusted for age, height and gender. Model 2 included all variables significantly associated with PWD in Model 1, including age, height and gender. As body mass index (BMI) and abdominal obesity categories were closely related, analyses were conducted separately for each marker (Models 2A and 2B for BMI and waist circumference, respectively). Results were expressed as multivariable-adjusted mean  $\pm$  standard error for categorical values and as adjusted regression coefficient for continuous variables. As a sensitivity analysis,

1  
2  
3 multivariable analysis was repeated after exclusion of all the ECGs that required a manual  
4  
5 determination of PWD. A two-tailed  $p < 0.05$  was considered statistically significant.  
6  
7  
8

## 9 **RESULTS**

### 10 **Selection procedure and characteristics of participants**

11  
12  
13  
14 Of the initial 4881 participants at the second follow-up, 3459 (70.9%) were included. The  
15 selection procedure is summarized in Figure 1. The majority of participants were Caucasian and 55%  
16 were women. Mean ( $\pm$ SD) age and BMI were  $62\pm 10$  years and  $26.4\pm 4.6$  kg/m<sup>2</sup>, respectively. 70% of  
17 the participants had dyslipidaemia, 45% had hypertension, 19% smoked and 8.5% were diabetic. 28%  
18 presented with metabolic syndrome and 9% reported a previous history of CV disease.  
19  
20  
21  
22  
23

24  
25 The characteristics of the excluded population and comparison between participants with  
26 PWD  $< 120$  and  $\geq 120$  ms are shown in the Appendix in Supplemental Table 1 and Supplemental  
27 Table 2, respectively. Significant differences between both populations were observed for age, BMI  
28 categories, alcohol use, personal history of CV diseases, hypertension, dyslipidemia, diabetes, renal  
29 failure, as well as for blood levels of troponin and NT-pro-BNP.  
30  
31  
32  
33  
34  
35

### 36 **PWD measure and distribution**

37  
38  
39 A total of 351 ECGs, i.e. 10% of the ECGs, needed a manual determination of PWD according  
40 to the previously mentioned criteria: 101 (29%) for extreme automatically calculated PWD ( $>$  or  $<$  2  
41 SD), and 250 (71%) for automatic assessment inability. The PWD distribution in the overall sample is  
42 illustrated in Figure 2; median and [interquartile range] of PWD were 112 [102-120] ms. Prevalence  
43 of PWD  $\geq 120$  ms was 21% (confidence interval: 20-23%).  
44  
45  
46  
47  
48  
49

### 50 **Association of PWD with demographic, clinical and biological markers**

51  
52  
53 The bivariate associations between PWD and the demographic, clinical, biological markers of  
54 interest are summarized in Table 1 (categorical and continuous variables). Longer PWD were found in  
55 elderly; in men; in participants with increased BMI or waist circumference; in former smokers; in  
56 participants with increased alcohol consumption, hypertension, dyslipidemia, diabetes, metabolic  
57  
58  
59  
60

1  
2  
3 syndrome or renal failure; in participants with a personal history of CV disease; in participants with  
4  
5 higher levels of troponin or NT-proBNP. Figures 3a and 3b illustrate the linear and positive  
6  
7 association of PWD with age and height, respectively. Supplemental Figure 1 shows mean values of  
8  
9 PWD in males and females by age.  
10  
11  
12  
13

14 **Table 1.** Baseline characteristics of the study population and bivariate associations between P-wave  
15 duration and different demographic, clinical and biological markers, CoLaus|PsyColaus study,  
16 Lausanne, Switzerland, 2014-2016.  
17  
18  
19  
20

|                   | N           | P-wave duration (ms) |     |     |     |     | p-value |
|-------------------|-------------|----------------------|-----|-----|-----|-----|---------|
|                   |             | 10%                  | 25% | 50% | 75% | 90% |         |
| <b>All</b>        | 3459 (100%) | 94                   | 102 | 112 | 120 | 128 |         |
| Age group         |             |                      |     |     |     |     |         |
| 40-49             | 441 (12.7)  | 88                   | 98  | 108 | 116 | 122 | <0.001  |
| 50-59             | 1189 (34.4) | 94                   | 102 | 110 | 118 | 124 |         |
| 60-69             | 975 (28.2)  | 96                   | 104 | 112 | 120 | 128 |         |
| 70-79             | 704 (20.4)  | 96                   | 104 | 114 | 124 | 132 |         |
| 80+               | 150 (4.3)   | 101                  | 108 | 118 | 126 | 134 |         |
| Gender            |             |                      |     |     |     |     | <0.001  |
| Men               | 1543 (44.6) | 98                   | 106 | 114 | 122 | 132 |         |
| Women             | 1916 (55.4) | 90                   | 100 | 110 | 118 | 124 |         |
| Race/ethnicity    |             |                      |     |     |     |     | 0.155   |
| Other             | 257 (7.4)   | 92                   | 102 | 110 | 118 | 126 |         |
| Caucasian         | 3202 (92.6) | 94                   | 102 | 112 | 120 | 128 |         |
| BMI categories    |             |                      |     |     |     |     | <0.001  |
| Normal            | 1405 (40.6) | 92                   | 102 | 110 | 118 | 126 |         |
| Overweight        | 1415 (40.9) | 94                   | 104 | 112 | 120 | 128 |         |
| Obese             | 639 (18.5)  | 94                   | 104 | 114 | 122 | 130 |         |
| Abdominal obesity |             |                      |     |     |     |     | <0.001  |
| No                | 2160 (62.5) | 94                   | 102 | 110 | 118 | 126 |         |
| Yes               | 1298 (37.5) | 92                   | 104 | 112 | 122 | 130 |         |
| Smoking           |             |                      |     |     |     |     | 0.004   |
| Never             | 1455 (42.1) | 92                   | 102 | 110 | 120 | 128 |         |
| Former            | 1349 (39.0) | 94                   | 104 | 112 | 120 | 130 |         |
| Current           | 655 (18.9)  | 94                   | 102 | 110 | 118 | 126 |         |
| Alcohol use       |             |                      |     |     |     |     | <0.001  |
| Non drinker       | 908 (26.3)  | 90                   | 100 | 110 | 120 | 128 |         |
| Low risk          | 2076 (60.0) | 94                   | 102 | 112 | 120 | 128 |         |
| Medium risk       | 386 (11.2)  | 98                   | 104 | 114 | 122 | 130 |         |

1  
2  
3  
4  
5  
6  
7  
8  
9  
10  
11  
12  
13  
14  
15  
16  
17  
18  
19  
20  
21  
22  
23  
24  
25  
26  
27  
28  
29  
30  
31  
32  
33  
34  
35  
36  
37  
38  
39  
40  
41  
42  
43  
44  
45  
46  
47  
48  
49  
50  
51  
52  
53  
54  
55  
56  
57  
58  
59  
60

|                            |             |    |     |     |     |     |        |
|----------------------------|-------------|----|-----|-----|-----|-----|--------|
| High risk                  | 89 (2.6)    | 98 | 106 | 116 | 122 | 130 |        |
| Personal history of CVD    |             |    |     |     |     |     | 0.003  |
| No                         | 3150 (91.1) | 94 | 102 | 112 | 120 | 128 |        |
| Yes                        | 309 (8.9)   | 94 | 104 | 112 | 124 | 132 |        |
| Family history for CVD     |             |    |     |     |     |     | 0.119  |
| No                         | 2115 (61.1) | 94 | 104 | 112 | 120 | 128 |        |
| Yes                        | 1344 (38.9) | 92 | 102 | 110 | 120 | 128 |        |
| Hypertension               |             |    |     |     |     |     | <0.001 |
| No                         | 1915 (55.4) | 92 | 102 | 110 | 118 | 124 |        |
| Yes                        | 1544 (44.6) | 96 | 106 | 114 | 122 | 130 |        |
| Dyslipidaemia              |             |    |     |     |     |     | 0.004  |
| No                         | 1015 (29.3) | 92 | 102 | 110 | 120 | 126 |        |
| Yes                        | 2444 (70.7) | 94 | 104 | 112 | 120 | 128 |        |
| Diabetes                   |             |    |     |     |     |     | 0.012  |
| No                         | 3160 (91.5) | 94 | 102 | 112 | 120 | 128 |        |
| Yes                        | 294 (8.5)   | 94 | 104 | 112 | 122 | 132 |        |
| Metabolic syndrome         |             |    |     |     |     |     | <0.001 |
| No                         | 2503 (72.4) | 94 | 102 | 110 | 120 | 126 |        |
| Yes                        | 955 (27.6)  | 94 | 104 | 112 | 122 | 132 |        |
| Renal failure              |             |    |     |     |     |     | 0.006  |
| No                         | 3086 (89.2) | 94 | 102 | 112 | 120 | 128 |        |
| Yes                        | 373 (10.8)  | 94 | 104 | 112 | 122 | 130 |        |
| Antidepressant medications |             |    |     |     |     |     | 0.860  |
| No                         | 3424 (99.0) | 94 | 102 | 112 | 120 | 128 |        |
| Yes                        | 35 (1.0)    | 92 | 100 | 112 | 120 | 126 |        |
| Troponin $\geq 14$ ng/L    |             |    |     |     |     |     | <0.001 |
| No                         | 2311 (91.1) | 94 | 104 | 112 | 120 | 130 |        |
| Yes                        | 226 (8.9)   | 94 | 106 | 118 | 126 | 136 |        |
| CRP $\geq 5$ mg/L          |             |    |     |     |     |     | 0.354  |
| No                         | 3174 (91.8) | 94 | 102 | 112 | 120 | 128 |        |
| Yes                        | 285 (8.2)   | 96 | 104 | 112 | 120 | 126 |        |
| NT-proBNP $\geq 125$ ng/L  |             |    |     |     |     |     | <0.001 |
| No                         | 1450 (67.4) | 92 | 102 | 110 | 118 | 126 |        |
| Yes                        | 702 (32.6)  | 92 | 104 | 112 | 122 | 132 |        |

Abbreviations: ms, milliseconds; BMI, Body Mass Index; CVD, cardiovascular disease. Please refer to the methods and Appendix for the definition of each characteristic. Results are expressed as deciles or quartiles. Between-group comparisons performed using non-parametric Kruskal-Wallis test.

The multivariable associations of PWD with the demographic, clinical and biological markers are summarized in Table 2. After adjusting for age, height and gender in the Model 1, only BMI categories, abdominal obesity and hypertension remained significantly associated with PWD. Even



1  
2  
3 after inclusion of all variables in the Model 2, age, height, gender, obesity markers (BMI or abdominal  
4 obesity) and hypertension were significantly associated with PWD. These statistically significant  
5 associations were confirmed for both Models even after exclusion of manually analysed ECGs.  
6  
7  
8  
9  
10 Results are presented in Supplemental Table 3 of the Appendix.  
11  
12  
13  
14  
15  
16  
17  
18  
19  
20  
21  
22  
23  
24  
25  
26  
27  
28  
29  
30  
31  
32  
33  
34  
35  
36  
37  
38  
39  
40  
41  
42  
43  
44  
45  
46  
47  
48  
49  
50  
51  
52  
53  
54  
55  
56  
57  
58  
59  
60

For peer review only

**Table 2.** Multivariable associations between P-wave duration and different demographic, clinical and biological markers, CoLaus|PsyColaus study, Lausanne, Switzerland, 2014-2016.

| Characteristics         | Model 1     | P-value | Model 2A           | P-value | Model 2B           | P-value |
|-------------------------|-------------|---------|--------------------|---------|--------------------|---------|
| Age (continuous)        | -           |         | 0.32 (0.28 - 0.37) | <0.001  | 0.31 (0.26 - 0.36) | <0.001  |
| Height (continuous)     | -           |         | 0.29 (0.23 - 0.36) | <0.001  | 0.27 (0.21 - 0.34) | <0.001  |
| Gender                  |             |         |                    | <0.001  |                    | <0.001  |
| Woman                   | -           |         | 110.0 ± 0.4        |         | 109.8 ± 0.4        |         |
| Man                     | -           |         | 112.1 ± 0.4        |         | 112.4 ± 0.4        |         |
| BMI categories          |             | <0.001  |                    | <0.001  |                    |         |
| Normal                  | 109.9 ± 0.4 |         | 110.1 ± 0.4        |         |                    |         |
| Overweight              | 110.9 ± 0.3 |         | 110.9 ± 0.4        |         |                    |         |
| Obese                   | 113.2 ± 0.5 |         | 113.0 ± 0.5        |         |                    |         |
| Abdominal obesity       |             | <0.001  |                    |         |                    | 0.016   |
| No                      | 110.4 ± 0.3 |         |                    |         | 110.5 ± 0.3        |         |
| Yes                     | 112.0 ± 0.4 |         |                    |         | 111.7 ± 0.4        |         |
| Smoking                 |             | 0.628   |                    |         |                    |         |
| Never                   | 111.0 ± 0.3 |         | -                  |         | -                  |         |
| Former                  | 111.1 ± 0.4 |         | -                  |         | -                  |         |
| Current                 | 110.5 ± 0.5 |         | -                  |         | -                  |         |
| Alcohol use             |             | 0.859   |                    |         |                    |         |
| Non drinker             | 110.7 ± 0.4 |         | -                  |         | -                  |         |
| Low risk                | 110.9 ± 0.3 |         | -                  |         | -                  |         |
| Medium risk             | 111.4 ± 0.7 |         | -                  |         | -                  |         |
| High risk               | 111.6 ± 1.4 |         | -                  |         | -                  |         |
| Personal history of CVD |             | 0.925   |                    |         |                    |         |

|    |                   |             |        |             |       |             |
|----|-------------------|-------------|--------|-------------|-------|-------------|
| 1  |                   |             |        |             |       |             |
| 2  |                   |             |        |             |       |             |
| 3  | No                | 110.9 ± 0.2 |        | -           |       | -           |
| 4  | Yes               | 111.0 ± 0.8 |        | -           |       | -           |
| 5  |                   |             |        |             |       |             |
| 6  | Hypertension      |             | <0.001 |             | 0.010 | 0.002       |
| 7  | No                | 110.1 ± 0.3 |        | 110.4 ± 0.3 |       | 110.3 ± 0.3 |
| 8  | Yes               | 112.0 ± 0.3 |        | 111.7 ± 0.4 |       | 111.8 ± 0.4 |
| 9  |                   |             |        |             |       |             |
| 10 | Dyslipidaemia     |             | 0.318  |             |       |             |
| 11 | No                | 110.6 ± 0.4 |        | -           |       | -           |
| 12 | Yes               | 111.1 ± 0.3 |        | -           |       | -           |
| 13 |                   |             |        |             |       |             |
| 14 | Diabetes          |             | 0.548  |             |       |             |
| 15 | No                | 111.0 ± 0.2 |        | -           |       | -           |
| 16 | Yes               | 110.5 ± 0.8 |        | -           |       | -           |
| 17 |                   |             |        |             |       |             |
| 18 | Metabolic         |             | 0.113  |             |       |             |
| 19 | syndrome          |             |        |             |       |             |
| 20 | No                | 110.7 ± 0.3 |        | -           |       | -           |
| 21 | Yes               | 111.5 ± 0.4 |        | -           |       | -           |
| 22 |                   |             |        |             |       |             |
| 23 | Renal failure     |             | 0.866  |             |       |             |
| 24 | No                | 111.0 ± 0.2 |        | -           |       | -           |
| 25 | Yes               | 110.8 ± 0.7 |        | -           |       | -           |
| 26 |                   |             |        |             |       |             |
| 27 | Troponin ≥14 ng/L |             | 0.920  |             |       |             |
| 28 | No                | 112.4 ± 0.3 |        | -           |       | -           |
| 29 | Yes               | 112.5 ± 1.0 |        | -           |       | -           |
| 30 |                   |             |        |             |       |             |
| 31 | NT-proBNP ≥125    |             | 0.310  |             |       |             |
| 32 | ng/L              |             |        |             |       |             |
| 33 | No                | 110.5 ± 0.4 |        | -           |       | -           |
| 34 | Yes               | 111.2 ± 0.5 |        | -           |       | -           |
| 35 |                   |             |        |             |       |             |
| 36 |                   |             |        |             |       |             |

-, not included in the model. BMI, Body Mass Index; CVD, cardiovascular disease. Please refer to the methods and Appendix for the definition of each characteristic. Results are expressed as adjusted coefficient (95% confidence interval) for continuous variables and as mean ± standard error for categorical variables. Model 1: adjusted for age (continuous), height (continuous) and gender. Full model (2A and 2B): including all variables indicated.

## DISCUSSION

To our knowledge, this is the first study assessing the PWD and its demographic, clinical and biological determinants in the Swiss population. On a study sample of 3459 participants, we found that age, height, gender, obesity markers and hypertension were associated with PWD. Moreover, we attested that 21% of the study population had a PWD  $\geq 120$  ms, possibly reflecting an interatrial block, which is in line with other population-based studies.(1, 2)

### PWD and age

We found that aging was associated with prolonged PWD, a finding also reported by others in several studies.(4, 7, 9, 15) Electrophysiologic studies and electroanatomic mapping of the atria demonstrated abnormal conduction in older subjects,(4) which appeared to be related to atrial structural changes and to interstitial fibrosis in particular.(16) Collagenous septa separate small groups of muscular fibres, causing electrical uncoupling.(16) In addition, aging is also associated with atrial dilatation, which contributes to prolonged PWD.(17)

### PWD and height

Height has been associated with electrocardiographic modifications, particularly with the prolongation of PR interval and QRS duration.(18) Still, little is known regarding the association between height and PWD. In our study, we observed that tall individuals had longer PWD. This finding fits with the literature showing that height is a strong determinant of left atrial size, and that left atrial enlargement is associated with mechanical stress responsible for slower atrial conduction.(18)

### PWD and gender

Men had longer PWD than women, a finding also reported elsewhere.(4, 7, 9, 15) The multivariable models we used may not account for all the anthropometric differences between men and women.(9) For instance, the heart size has been shown to be greater in men than in women.(17) Other factors may play a role, such as the effect of sex hormones but there is currently a paucity of data regarding the possible effect of sex hormones on PWD.(17)

### **PWD and obesity markers**

BMI categories or abdominal obesity were positively associated with PWD, a finding also reported elsewhere.(4, 7, 19) Interestingly, obesity has well known effects on the heart, an entity known as metabolic cardiomyopathy. Obesity is responsible for structural and functional changes in cardiomyocytes independently of coronary artery disease or hypertension.(19) Regarding the metabolic cardiomyopathy, an important pathophysiological mechanism is the systemic pro-inflammatory status induced by obesity. This eventually induces low-grade inflammation in the heart with dysfunction of subcellular components (mitochondrial dysfunction; oxidative stress and impaired calcium handling), inflammatory cell infiltration and neurohumoral activation.(20) Advanced stages are characterized by apoptosis, adipocytosis, fibrosis and atrial remodelling.(20) A second important pathophysiological mechanism is the fatty acid accumulation in the cardiomyocytes. The normal heart reaches a balance between free fatty acid (FFA) uptake and oxidation. The increased level of circulating FFA observed in obesity eventually results in accumulation of lipid droplets within the cardiomyocytes, impacting cardiac function and promoting apoptosis also known as lipotoxic cardiomyopathy.(20, 21) Studies have shown an association between cardiomyocyte fat content and ECG changes including longer PWD.(19, 22)

### **PWD and hypertension**

Hypertension was positively correlated with PWD after multivariable adjustments in both models, an association also reported by others.(7, 11) Left ventricular hypertrophy and diastolic dysfunction caused by high blood pressure are responsible for increased atrial strain with subsequent dilatation and fibrosis.(11, 23) These changes have repercussions on electrical conduction and, therefore, PWD.(23)

### STUDY STRENGTHS AND LIMITATIONS

Our study was conducted in a population-based sample allowing for the generalization of the results to similar Caucasian populations. The large sample size of our study population, together with the full set of collected data, allowed us to explore associations between PWD and a number of relevant variables. All the significant associations found in our study can be easily related with underlying (patho)physiological mechanisms.

Our study has also some limitations. First, there is no published consensus about the measurement of PWD. Most studies used automated measurements provided by different softwares. Each software has its own specific algorithm susceptible to give slightly different values.<sup>(24)</sup> Second, we used the SEMA software to calculate automatically PWD values. A number of studies have included additional markers of atrial electromechanical function (i.e. P-wave indices, such as P-wave terminal force), which were not part of the results provided by the software we used. Third, a significant number of ECG (10%) needed a manual determination of PWD; this might have biased the results. However, even after exclusion of the manually analysed ECGs, associations remained unchanged. Finally, another limitation of our study is our inability to support causal association between PWD and structural myocardial abnormalities (atrial enlargement, fibro-fatty infiltration) by the lack of anatomic-histological and echocardiographic information, which was not part of our study design.

## **FUTURE DIRECTIONS**

Considering the metabolic syndrome's burden, incidence of CV events and death will continue to be high. PWD, as an intermediate phenotype reflecting subclinical, structural and functional changes in the atria, can be a useful marker to both assess and monitor the risk of developing AF and worse CV outcomes.(1–3, 11) Based on our results, it would be interesting to know the evolution of the participants according to their PWD. Data from echocardiography or other imaging techniques, as well as post-mortem materials, could be useful to prove the fatty or fibrotic infiltration of the atria or left atrial enlargement. Moreover, future work could determine if preventive interventions (e. g. lifestyle and dietary intervention) based on the PWD have positive effects on clinical outcomes. The ongoing follow-up of the CoLaus|PsyCoLaus cohort would provide some information in the near future.

## **CONCLUSION**

In a cross-sectional study conducted on a large sample of a population-based cohort, PWD was associated with age, height, male gender, obesity markers and hypertension. Most of these associations could possibly relate to both structural and functional changes affecting the atrial tissue.

## ACKNOWLEDGEMENTS

Nobody to acknowledge.

## OTHER REQUIRED STATEMENTS

### Contributors

FB conducted the literature search, interpreted the results and wrote the manuscript. PM-V performed the statistical analyses and contributed to write a part of the manuscript. DG interpreted the results and thoroughly revised the manuscript for important intellectual content. FB and EP calculated manually, when required, the PWD. PV and GW participated to conceiving the study. All authors have read and approved this version of the manuscript.

### Funding

This work was and is supported by research grants from GlaxoSmithKline; the Faculty of Biology and Medicine of Lausanne; and the Swiss National Science Foundation [33CSCO-122661, 33CS30-139468 and 33CS30-148401). The founding sources had no involvement in the study design, data collection, analysis and interpretation, writing of the report, or decision to submit the article for publication.

### Competing interests

None declared.

### Patient consent for publication

Not required.

### Ethics approval

The Ethics Committee of Canton Vaud ([www.cer-vd.ch](http://www.cer-vd.ch)) approved the CoLaus|PsyColaus study (reference 16/03); the approval was renewed for the first (reference 33/09) and the second (reference 26/14) follow-ups. The full decisions can be obtained from the authors upon request. The study was performed in agreement with the Helsinki declaration and in accordance with the



1  
2  
3 applicable Swiss legislation. All participants gave their signed informed consent before entering the  
4  
5 study.

6  
7 **Provenance and peer review**

8  
9 Not commissioned; externally peer reviewed.

10  
11  
12 **Data availability statement**

13  
14 Due to the sensitivity of the data and the lack of consent for online posting, individual data  
15 cannot be made accessible. Only metadata will be made available in digital repositories. Metadata  
16 requests can also be performed via the study website [www.colaus-psycholaus.ch](http://www.colaus-psycholaus.ch).  
17  
18  
19  
20  
21  
22  
23  
24  
25  
26  
27  
28  
29  
30  
31  
32  
33  
34  
35  
36  
37  
38  
39  
40  
41  
42  
43  
44  
45  
46  
47  
48  
49  
50  
51  
52  
53  
54  
55  
56  
57  
58  
59  
60

For peer review only

**REFERENCES**

1. Hari KJ, Nguyen TP, Soliman EZ. Relationship between P-wave duration and the risk of atrial fibrillation. *Expert Rev Cardiovasc Ther.* 2018;16:837-843.
2. Skov MW, Ghouse J, Kühl JT et al. Risk Prediction of Atrial Fibrillation Based on Electrocardiographic Interatrial Block. *J Am Heart Assoc.* 2018;7.
3. Eranti A, Carlson J, Kenttä T et al. Orthogonal P-wave morphology, conventional P-wave indices, and the risk of atrial fibrillation in the general population using data from the Finnish Hospital Discharge Register. *Europace.* 2020;22:1173-1181.
4. Magnani JW, Gorodeski EZ, Johnson VM et al. P wave duration is associated with cardiovascular and all-cause mortality outcomes: the National Health and Nutrition Examination Survey. *Heart Rhythm.* 2011;8:93-100.
5. Bayés de Luna A, Platonov P, Cosio FG et al. Interatrial blocks. A separate entity from left atrial enlargement: a consensus report. *J Electrocardiol.* 2012;45:445-451.
6. Huo Y, Mitrofanova L, Orshanskaya V et al. P-wave characteristics and histological atrial abnormality. *J Electrocardiol.* 2014;47:275-280.
7. Lehtonen AO, Langén VL, Puukka PJ et al. Incidence rates, correlates, and prognosis of electrocardiographic P-wave abnormalities - a nationwide population-based study. *J Electrocardiol.* 2017;50:925-932.
8. Magnani JW, Williamson MA, Ellinor PT et al. P wave indices: current status and future directions in epidemiology, clinical, and research applications. *Circ Arrhythm Electrophysiol.* 2009;2:72-79.
9. Havmoller R, Carlson J, Holmqvist F et al. Age-related changes in P wave morphology in healthy subjects. *BMC Cardiovasc Disord.* 2007;7:22.
10. Lehtonen AO, Puukka P, Varis J et al. Prevalence and prognosis of ECG abnormalities in normotensive and hypertensive individuals. *J Hypertens.* 2016;34:959-966.

- 1  
2  
3 11. Alonso A, Soliman EZ, Chen LY et al. Association of blood pressure and aortic distensibility  
4 with P wave indices and PR interval: the multi-ethnic study of atherosclerosis (MESA). *J*  
5 *Electrocardiol.* 2013;46:359.e1-6.  
6  
7
- 8  
9 12. Firmann M, Mayor V, Vidal PM et al. The CoLaus study: a population-based study to  
10 investigate the epidemiology and genetic determinants of cardiovascular risk factors and metabolic  
11 syndrome. *BMC Cardiovasc Disord.* 2008;8:6.  
12  
13
- 14 13. Kligfield P, Badilini F, Denjoy I et al. Comparison of automated interval measurements by  
15 widely used algorithms in digital electrocardiographs. *Am Heart J.* 2018;200:1-10.  
16  
17
- 18 14. Haefliger D, Pruvot E, Monney P et al. Validation de la mesure de la durée de l'onde P dans  
19 une étude de population. 2014  
20  
21
- 22 15. Van der Ende MY, Siland JE, Snieder H et al. Population-based values and abnormalities of  
23 the electrocardiogram in the general Dutch population: The Lifelines Cohort Study. *Clin Cardiol.*  
24 2017;40:865-872.  
25  
26
- 27 16. Spach MS, Dolber PC. Relating extracellular potentials and their derivatives to anisotropic  
28 propagation at a microscopic level in human cardiac muscle. Evidence for electrical uncoupling of  
29 side-to-side fiber connections with increasing age. *Circ Res.* 1986;58:356-371.  
30  
31
- 32 17. Liu XK, Jahangir A, Terzic A et al. Age- and sex-related atrial electrophysiologic and structural  
33 changes. *Am J Cardiol.* 2004;94:373-375.  
34  
35
- 36 18. Kofler T, Thériault S, Bossard M et al. Relationships of Measured and Genetically Determined  
37 Height With the Cardiac Conduction System in Healthy Adults. *Circ Arrhythm Electrophysiol.* 2017;10  
38  
39
- 40 19. Babcock MJ, Soliman EZ, Ding J et al. Pericardial fat and atrial conduction abnormalities in the  
41 Multiethnic Study of Atherosclerosis (MESA). *Obesity (Silver Spring).* 2011;19:179-184.  
42  
43
- 44 20. Nishida K, Otsu K. Inflammation and metabolic cardiomyopathy. *Cardiovasc Res.*  
45 2017;113:389-398.  
46  
47
- 48 21. Alí A, Boutjdir M, Aromolaran AS. Cardiolipotoxicity, Inflammation, and Arrhythmias: Role for  
49 Interleukin-6 Molecular Mechanisms. *Front Physiol.* 2018;9:1866.  
50  
51  
52  
53  
54  
55  
56  
57  
58  
59  
60

- 1  
2  
3 22. Friedman DJ, Wang N, Meigs JB et al. Pericardial fat is associated with atrial conduction: the  
4 Framingham Heart Study. J Am Heart Assoc. 2014;3:e000477.  
5  
6  
7 23. Okutucu S, Aytemir K, Oto A. P-wave dispersion: What we know till now. JRSM Cardiovasc  
8 Dis. 2016;5:2048004016639443.  
9  
10  
11  
12 24. Schläpfer J, Wellens HJ. Computer-Interpreted Electrocardiograms: Benefits and Limitations.  
13 J Am Coll Cardiol. 2017;70:1183-1192.  
14  
15  
16  
17  
18  
19  
20  
21  
22  
23  
24  
25  
26  
27  
28  
29  
30  
31  
32  
33  
34  
35  
36  
37  
38  
39  
40  
41  
42  
43  
44  
45  
46  
47  
48  
49  
50  
51  
52  
53  
54  
55  
56  
57  
58  
59  
60

For peer review only

**FIGURE LEGENDS**

**Figure 1.** Selection procedure. Percentages were calculated using the baseline sample size as denominator. WPW, Wolff-Parkinson-White; ECG, electrocardiogram.

**Figure 2.** Distribution of P-wave duration in the whole sample, CoLaus|PsyColaus study, Lausanne, Switzerland, 2014-2016. ms, milliseconds.

**Figure 3. Panel A** Association between P-wave duration and age. **Panel B** Association between P-wave duration and height. The dashed blue horizontal line represents the sample mean; the red line represents the linear regression. ms, milliseconds; cm, centimetres.

1  
2  
3  
4  
5  
6  
7  
8  
9  
10  
11  
12  
13  
14  
15  
16  
17  
18  
19  
20  
21  
22  
23  
24  
25  
26  
27  
28  
29  
30  
31  
32  
33  
34  
35  
36  
37  
38  
39  
40  
41  
42  
43  
44  
45  
46  
47  
48  
49  
50  
51  
52  
53  
54  
55  
56  
57  
58  
59  
60

**A**



# Figure 2

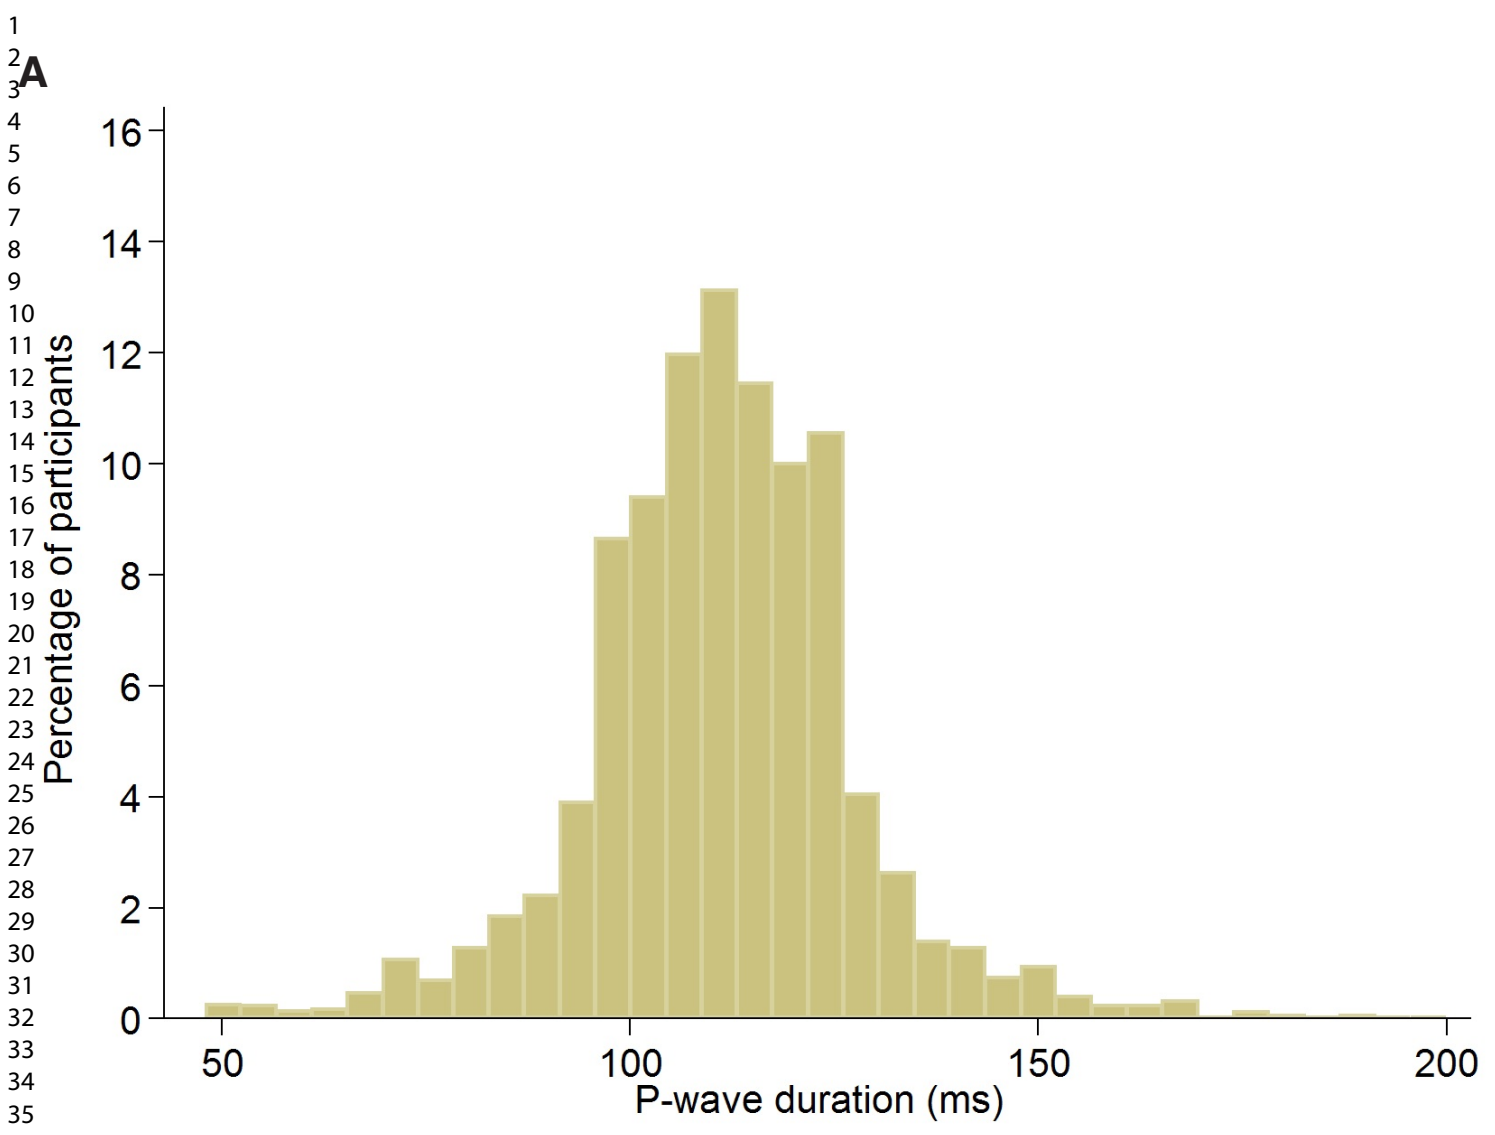

View only

1  
2  
3  
4  
5  
6  
7  
8  
9  
10  
11  
12  
13  
14  
15  
16  
17  
18  
19  
20  
21  
22  
23  
24  
25  
26  
27  
28  
29  
30  
31  
32  
33  
34  
35  
36  
37  
38  
39  
40  
41  
42  
43  
44  
45  
46  
47  
48  
49  
50  
51  
52  
53  
54  
55  
56  
57  
58  
59  
60

1  
2  
3  
4  
5  
6  
7  
8  
9  
10  
11  
12  
13  
14  
15  
16  
17  
18  
19  
20  
21  
22  
23  
24  
25  
26  
27  
28  
29  
30  
31  
32  
33  
34  
35  
36  
37  
38  
39  
40  
41  
42  
43  
44  
45  
46  
47  
48  
49  
50  
51  
52  
53  
54  
55  
56  
57  
58  
59  
60

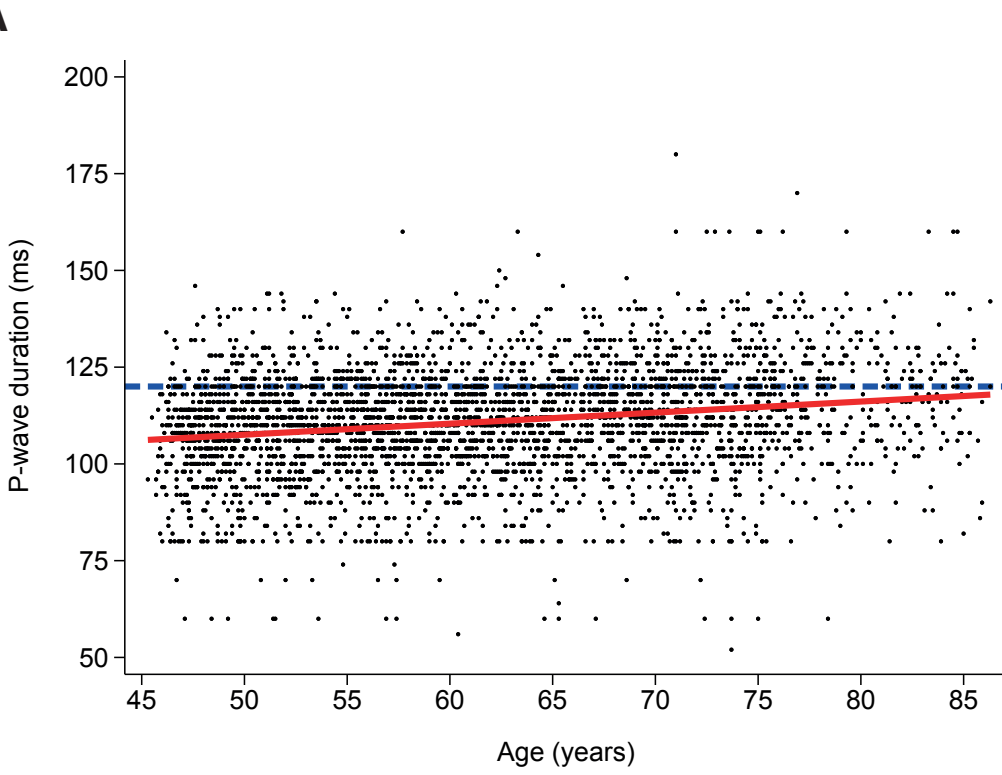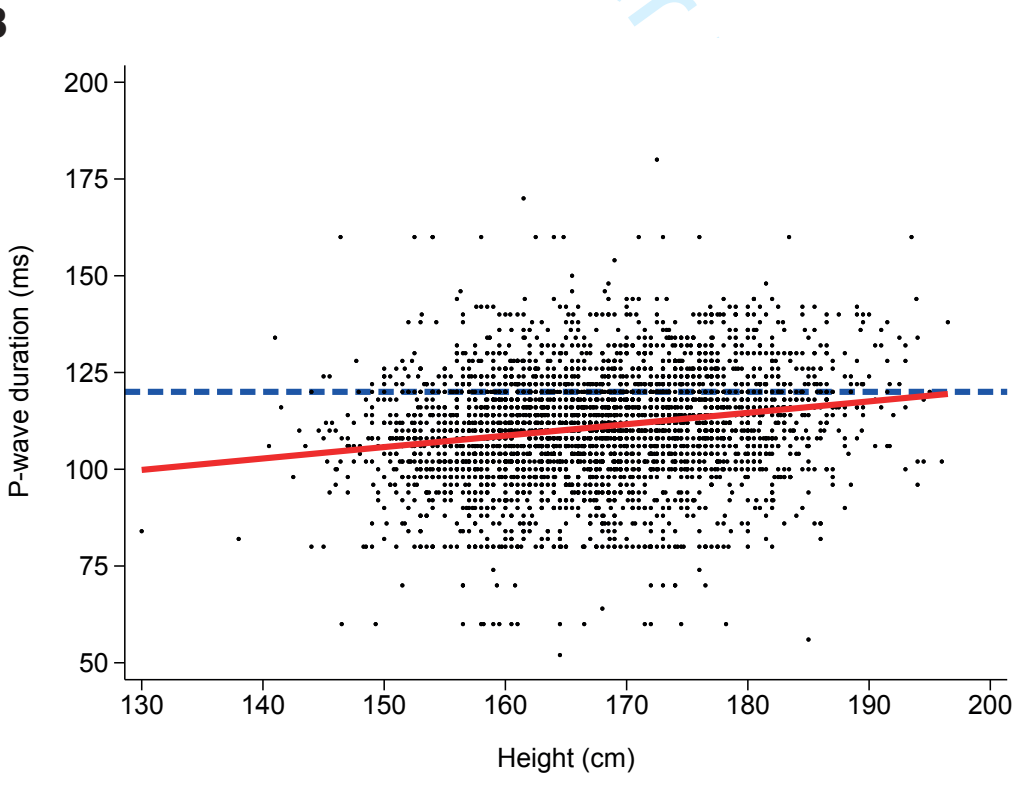



# Supplemental Figure 1



24 **Supplemental Figure 1.** Mean P-wave duration values of males and females by age. ms, milliseconds. Squares represent  
25 men and triangles represent women.

26  
27  
28  
29  
30  
31  
32  
33  
34  
35  
36  
37  
38  
39  
40  
41  
42  
43  
44  
45  
46  
47  
48  
49  
50  
51  
52  
53  
54  
55  
56  
57  
58  
59  
60

peer review only

## APPENDIX

**Anthropometric measures and blood pressure measures are described in this Appendix. It also includes a description of the methods used to determine the biological values. A specific set of references is provided for this Appendix.**

Body weight and height were measured with participants standing without shoes in light indoor clothing. Weight was measured in kilograms to the nearest 0.1 kg using a Seca™ scale (Seca, Hamburg, Germany). Height was measured to the nearest 5 mm using a Seca™ height gauge (Seca, Hamburg, Germany). Body mass index (BMI) was defined as weight (kg)/height<sup>2</sup> (m<sup>2</sup>). Obesity was defined as BMI ≥ 30 kg/m<sup>2</sup>, overweight as BMI ≥ 25 and < 30 kg/m<sup>2</sup>, normal as BMI ≥ 18.5 and < 25 kg/m<sup>2</sup> and underweight as BMI < 18.5 kg/m<sup>2</sup>. Due to the small number of underweight participants (n=55), they were included in the normal category.

Waist circumference was measured mid-way between the lowest rib and the iliac crest and abdominal obesity was defined as waist circumference > 102 cm or > 88 cm for men and women respectively.(1)

Blood pressure (BP) was measured thrice on the left arm after at least 10 minutes rest in the seated position using a clinically validated automated oscillometric device (Omron® HEM-907, Matsusaka, Japan) with a standard cuff, or a large cuff if arm circumference was ≥ 33 cm. The average of the last two measurements was used. Hypertension was defined as mean systolic BP (SBP) ≥ 140 mmHg and/or a mean diastolic BP (DBP) ≥ 90 mmHg and/or use of anti-hypertensive medication.

Venous blood samples (50 mL) were drawn in the fasting state. All biological assays were performed at the clinical laboratory of the Lausanne University Hospital within 2 hours of blood collection on fresh samples. Glycated haemoglobin (HbA1c) was measured by high performance liquid chromatography (Bio-Rad, D-10™). Subjects were considered to have diabetes if they had a serum HbA1c ≥ 6.5% (≥48 nmol/mmol) and/or were taking anti-diabetic treatment.

1  
2  
3  
4  
5 Total cholesterol was measured by CHOD-PAP; HDL-cholesterol by CHOD-PAP + PEG + cyclodextrin;  
6  
7 triglycerides by GPO-PAP. In our analysis, dyslipidemia was defined as triglycerides  $\geq 2$  mmol/l and/or  
8  
9 LDL  $\geq 3$  mmol/l and/or lipid lowering treatment.

11 High sensitivity CRP was assessed by immunoassay (HS latex) and was considered elevated  
12  
13 when  $\geq 5$  mg/l. Serum and urinary creatinine were performed by the Jaffe kinetic compensated  
14  
15 method. Renal failure was considered when eGFR was  $< 60$  ml/min/1.73m<sup>2</sup> using CKD-EPI formula.  
16  
17 Troponine T hs and NT-proBNP were measured by electrochemiluminescence and considered  
18  
19 elevates when  $\geq 14$  ng/l and 125 ng/l respectively. Biological threshold were defined based on the  
20  
21 standard values in our clinical laboratory (Lausanne University Hospital). Since the threshold value for  
22  
23 a positive NT-proBNP result usually increased with age, we only considered the lowest threshold  
24  
25 value available in our laboratory (i.e. 125 ng/l), as a simple, more sensitive approach to the potential  
26  
27 effect of this variable.  
28  
29  
30  
31

32 The metabolic syndrome was retained in presence of any 3 out of 5 risk factors on the basis  
33  
34 of the JIS (Joint Interim Statement) definition. The criteria for clinical diagnosis are: elevated waist  
35  
36 circumference ( $\geq 102$  cm for men and  $\geq 88$  cm for women), elevated triglycerides ( $\geq 1.7$  mmol/l),  
37  
38 reduced HDL-C ( $< 1.0$  mmol/l for men and  $< 1.3$  mmol/l for women), elevated BP (systolic BP  $\geq 130$   
39  
40 mm Hg and/or diastolic BP  $\geq 85$  mm Hg), elevated fasting glucose ( $\geq 5.6$  mmol/l).(2)  
41  
42  
43  
44  
45  
46  
47  
48  
49  
50  
51  
52  
53  
54  
55  
56  
57  
58  
59  
60

**Supplemental Table 1.** Complete baseline characteristics of the study population, CoLaus|PsyColaus study, Lausanne, Switzerland, 2014-2016.

|                            | Included    | Excluded    | P-value |
|----------------------------|-------------|-------------|---------|
| <b>All</b>                 | 3459        | 1422        |         |
| Age in years (mean; SD)    | 62 ±10      | 65 ±11      | <0.001  |
| Gender                     |             |             |         |
| Men                        | 1543 (44.6) | 649 (45.6)  |         |
| Women                      | 1916 (55.4) | 773 (54.4)  |         |
| Race/ethnicity             |             |             |         |
| Caucasian                  | 3202 (92.6) | 1313 (92.3) |         |
| Other                      | 257 (7.4)   | 109 (7.7)   |         |
| BMI categories             |             |             | 0.005   |
| Normal                     | 1405 (40.6) | 452 (44.2)  |         |
| Overweight                 | 1415 (40.9) | 360 (35.2)  |         |
| Obese                      | 639 (18.5)  | 210 (20.6)  |         |
| Abdominal obesity          | 1298 (37.5) | 395 (38.5)  | 0.562   |
| Smoking                    |             |             | 0.952   |
| Never                      | 1455 (42.1) | 431 (41.6)  |         |
| Former                     | 1349 (39.0) | 405 (39.1)  |         |
| Current                    | 655 (18.9)  | 200 (19.3)  |         |
| Alcohol use                |             |             | <0.001  |
| Non drinker                | 908 (26.3)  | 267 (34.2)  |         |
| Low risk                   | 2076 (60.0) | 412 (52.8)  |         |
| Medium risk                | 386 (11.2)  | 87 (11.1)   |         |
| High risk                  | 89 (2.6)    | 15 (1.9)    |         |
| Personal history of CVD    | 309 (8.9)   | 209 (14.7)  | <0.001  |
| Family history of CVD      | 1344 (38.9) | 421 (29.6)  | <0.001  |
| Hypertension               | 1544 (44.6) | 719 (58.6)  | <0.001  |
| Dyslipidaemia              | 2444 (70.7) | 1064 (74.8) | 0.003   |
| Diabetes                   | 294 (8.5)   | 188 (17.1)  | <0.001  |
| Metabolic syndrome         | 955 (27.6)  | 304 (30.6)  | 0.065   |
| Renal failure              | 373 (10.8)  | 163 (15.5)  | <0.001  |
| Antidepressant medications | 35 (1.0)    | 15 (1.1)    | 0.892   |
| Troponin T > 14 ng/l       | 226 (8.9)   | 156 (19.3)  | <0.001  |
| CRP ≥ 5 mg/L               | 285 (8.2)   | 111 (15.0)  | <0.001  |
| NT-proBNP > 125 pg/ml      | 702 (32.6)  | 365 (51.3)  | <0.001  |

*SD, standard deviation; BMI, body mass index; CVD; cardiovascular disease; CRP, C-reactive protein. Please refer to the methods and Appendix for the definition of each characteristic. In column excluded, totals might not add to 1422 due to missing data. Results are expressed as mean ± standard deviation for continuous variables and as number of participants (column percentage) for*

1  
2  
3 *categorical variables. Between-group comparisons performed using t-test for continuous variables*  
4 *and chi-square for categorical variables.*  
5  
6  
7  
8  
9  
10  
11  
12  
13  
14  
15  
16  
17  
18  
19  
20  
21  
22  
23  
24  
25  
26  
27  
28  
29  
30  
31  
32  
33  
34  
35  
36  
37  
38  
39  
40  
41  
42  
43  
44  
45  
46  
47  
48  
49  
50  
51  
52  
53  
54  
55  
56  
57  
58  
59  
60

For peer review only

**Supplemental Table 2.** Characteristics of participants with P-wave duration < 120 and ≥ 120 ms, CoLaus|PsyColaus study, Lausanne, Switzerland, 2014-2016.

|                            | PWD < 120 ms | PWD ≥ 120 ms | P-value |
|----------------------------|--------------|--------------|---------|
| <b>All</b>                 | 2718         | 741          |         |
| Age in years (mean; SD)    | 61 ± 9.6     | 65.5 ± 10.2  | <0.001  |
| Gender                     |              |              | <0.001  |
| Men                        | 1110 (40.8)  | 433 (58.4)   |         |
| Women                      | 1608 (59.2)  | 308 (41.6)   |         |
| Race/ethnicity             |              |              | 0.017   |
| Caucasian                  | 2501 (92.0)  | 701 (94.6)   |         |
| Other                      | 217 (8.0)    | 40 (5.4)     |         |
| BMI categories             |              |              | <0.001  |
| Normal                     | 1157 (42.6)  | 248 (33.5)   |         |
| Overweight                 | 1106 (40.7)  | 309 (41.7)   |         |
| Obese                      | 455 (16.7)   | 184 (24.8)   |         |
| Abdominal obesity          | 960 (35.3)   | 338 (45.6)   | <0.001  |
| Smoking                    |              |              | 0.005   |
| Never                      | 1159 (42.6)  | 296 (40)     |         |
| Former                     | 1024 (37.7)  | 325 (43.9)   |         |
| Current                    | 535 (19.7)   | 120 (16.2)   |         |
| Alcohol use                |              |              | 0.146   |
| Non drinker                | 719 (26.5)   | 189 (25.5)   |         |
| Low risk                   | 1645 (60.5)  | 431 (58.2)   |         |
| Medium risk                | 288 (10.6)   | 98 (13.2)    |         |
| High risk                  | 66 (2.4)     | 23 (3.1)     |         |
| Personal history of CVD    | 210 (7.7)    | 99 (13.4)    | <0.001  |
| Family history of CVD      | 1061 (39.0)  | 283 (38.2)   | 0.676   |
| Hypertension               | 1121 (41.2)  | 423 (57.1)   | <0.001  |
| Dyslipidaemia              | 1899 (69.9)  | 545 (73.6)   | 0.051   |
| Diabetes                   | 213 (7.9)    | 81 (11.0)    | 0.007   |
| Metabolic syndrome         | 691 (25.4)   | 264 (35.6)   | <0.001  |
| Renal failure              | 267 (9.8)    | 106 (14.3)   | <0.001  |
| Antidepressant medications | 27 (1.0)     | 8 (1.1)      | 0.835   |
| Troponin T > 14 ng/l       | 140 (7.4)    | 86 (13.3)    | <0.001  |
| CRP ≥ 5 mg/L               | 219 (8.1)    | 66 (8.9)     | 0.456   |
| NT-proBNP > 125 pg/ml      | 493 (29.4)   | 209 (44.0)   | <0.001  |

*PWD, P-wave duration; ms, milliseconds; SD, standard deviation; BMI, body mass index; CVD; cardiovascular disease; CRP, C-reactive protein. Please refer to the methods and Appendix for the definition of each characteristic. Results are expressed as mean ± standard deviation or as number of participants (column percentage). Between-group comparisons performed using student t-test or chi-square.*

**Supplemental Table 3.** Multivariable associations between P-wave duration and different demographic, clinical and biological markers, CoLaus|PsyColaus study, Lausanne, Switzerland, 2014-2016. Only computer-evaluated ECGs.

| Characteristics         | Model 1     | P-value | Model 2A           | P-value | Model 2B           | P-value |
|-------------------------|-------------|---------|--------------------|---------|--------------------|---------|
| Age (continuous)        | -           |         | 0.29 (0.25 - 0.34) | <0.001  | 0.28 (0.24 - 0.33) | <0.001  |
| Height (continuous)     | -           |         | 0.27 (0.20 - 0.33) | <0.001  | 0.24 (0.18 - 0.30) | <0.001  |
| Gender                  |             |         |                    | <0.001  |                    | <0.001  |
| Woman                   | -           |         | 110.6 ± 0.3        |         | 110.3 ± 0.3        |         |
| Man                     | -           |         | 112.5 ± 0.4        |         | 112.9 ± 0.4        |         |
| BMI categories          |             | <0.001  |                    | <0.001  |                    |         |
| Normal                  | 110.3 ± 0.3 |         | 110.5 ± 0.3        |         |                    |         |
| Overweight              | 111.7 ± 0.3 |         | 111.7 ± 0.3        |         |                    |         |
| Obese                   | 113.2 ± 0.5 |         | 113.0 ± 0.5        |         |                    |         |
| Abdominal obesity       |             | <0.001  |                    |         |                    | <0.001  |
| No                      | 110.8 ± 0.3 |         |                    |         | 110.9 ± 0.3        |         |
| Yes                     | 112.6 ± 0.3 |         |                    |         | 112.4 ± 0.4        |         |
| Smoking                 |             | 0.716   |                    |         |                    |         |
| Never                   | 111.6 ± 0.3 |         | -                  |         | -                  |         |
| Former                  | 111.5 ± 0.3 |         | -                  |         | -                  |         |
| Current                 | 111.1 ± 0.5 |         | -                  |         | -                  |         |
| Alcohol use             |             | 0.875   |                    |         |                    |         |
| Non drinker             | 111.3 ± 0.4 |         | -                  |         | -                  |         |
| Low risk                | 111.4 ± 0.3 |         | -                  |         | -                  |         |
| Medium risk             | 111.9 ± 0.6 |         | -                  |         | -                  |         |
| High risk               | 111.4 ± 1.3 |         | -                  |         | -                  |         |
| Personal history of CVD |             | 0.632   |                    |         |                    |         |
| No                      | 111.5 ± 0.2 |         | -                  |         | -                  |         |

|    |                     |             |        |             |       |             |
|----|---------------------|-------------|--------|-------------|-------|-------------|
| 1  |                     |             |        |             |       |             |
| 2  |                     |             |        |             |       |             |
| 3  | Yes                 | 111.1 ± 0.7 |        | -           |       | -           |
| 4  | Hypertension        |             | <0.001 |             | 0.011 | 0.004       |
| 5  | No                  | 110.7 ± 0.3 |        | 110.9 ± 0.3 |       | 110.8 ± 0.3 |
| 6  | Yes                 | 112.4 ± 0.3 |        | 112.1 ± 0.3 |       | 112.2 ± 0.3 |
| 7  | Dyslipidaemia       |             | 0.243  |             |       |             |
| 8  | No                  | 111.1 ± 0.4 |        | -           |       | -           |
| 9  | Yes                 | 111.6 ± 0.2 |        | -           |       | -           |
| 10 | Diabetes            |             | 0.146  |             |       |             |
| 11 | No                  | 111.5 ± 0.2 |        | -           |       | -           |
| 12 | Yes                 | 110.4 ± 0.7 |        | -           |       | -           |
| 13 | Metabolic syndrome  |             | 0.064  |             |       |             |
| 14 | No                  | 111.2 ± 0.2 |        | -           |       | -           |
| 15 | Yes                 | 112.1 ± 0.4 |        | -           |       | -           |
| 16 | Renal failure       |             | 0.732  |             |       |             |
| 17 | No                  | 111.5 ± 0.2 |        | -           |       | -           |
| 18 | Yes                 | 111.2 ± 0.7 |        | -           |       | -           |
| 19 | Troponin ≥14 ng/L   |             | 0.707  |             |       |             |
| 20 | No                  | 112.8 ± 0.3 |        | -           |       | -           |
| 21 | Yes                 | 112.5 ± 0.9 |        | -           |       | -           |
| 22 | NT-proBNP ≥125 ng/L |             | 0.933  |             |       |             |
| 23 | No                  | 111.2 ± 0.3 |        | -           |       | -           |
| 24 | Yes                 | 111.3 ± 0.5 |        | -           |       | -           |

-, not included in the model. BMI, Body Mass Index; CVD, cardiovascular disease. Please refer to the methods and Appendix for the definition of each characteristic. Results are expressed as adjusted coefficient (95% confidence interval) for continuous variables and as mean ± standard error for categorical variables. Model 1: adjusted for age (continuous), height (continuous) and gender. Full model (2A and 2B): including all variables indicated.



## REFERENCES

1. National Cholesterol Education Program (NCEP) Expert Panel on Detection E, and Treatment of High Blood Cholesterol in Adults (Adult Treatment Panel III. Third Report of the National Cholesterol Education Program (NCEP) Expert Panel on Detection, Evaluation, and Treatment of High Blood Cholesterol in Adults (Adult Treatment Panel III) final report. *Circulation* 2002;106:3143-3421.
2. Alberti KG, Eckel RH, Grundy SM et al. Harmonizing the metabolic syndrome: a joint interim statement of the International Diabetes Federation Task Force on Epidemiology and Prevention; National Heart, Lung, and Blood Institute; American Heart Association; World Heart Federation; International Atherosclerosis Society; and International Association for the Study of Obesity. *Circulation* 2009;120:1640-1645.

**STROBE 2007 (v4) checklist of items to be included in reports of observational studies in epidemiology\***  
**Checklist for cohort, case-control, and cross-sectional studies (combined)**

| Section/Topic             | Item # | Recommendation                                                                                                                                                                                                                                                                                                                                                                                                                                                         | Reported on page # |
|---------------------------|--------|------------------------------------------------------------------------------------------------------------------------------------------------------------------------------------------------------------------------------------------------------------------------------------------------------------------------------------------------------------------------------------------------------------------------------------------------------------------------|--------------------|
| Title and abstract        | 1      | (a) Indicate the study's design with a commonly used term in the title or the abstract                                                                                                                                                                                                                                                                                                                                                                                 | 1                  |
|                           |        | (b) Provide in the abstract an informative and balanced summary of what was done and what was found                                                                                                                                                                                                                                                                                                                                                                    | 2                  |
| <b>Introduction</b>       |        |                                                                                                                                                                                                                                                                                                                                                                                                                                                                        |                    |
| Background/rationale      | 2      | Explain the scientific background and rationale for the investigation being reported                                                                                                                                                                                                                                                                                                                                                                                   | 3-4                |
| Objectives                | 3      | State specific objectives, including any pre-specified hypotheses                                                                                                                                                                                                                                                                                                                                                                                                      | 3-4                |
| <b>Methods</b>            |        |                                                                                                                                                                                                                                                                                                                                                                                                                                                                        |                    |
| Study design              | 4      | Present key elements of study design early in the paper                                                                                                                                                                                                                                                                                                                                                                                                                | 2                  |
| Setting                   | 5      | Describe the setting, locations, and relevant dates, including periods of recruitment, exposure, follow-up, and data collection                                                                                                                                                                                                                                                                                                                                        | 4-5                |
| Participants              | 6      | (a) <i>Cohort study</i> —Give the eligibility criteria, and the sources and methods of selection of participants. Describe methods of follow-up<br><i>Case-control study</i> —Give the eligibility criteria, and the sources and methods of case ascertainment and control selection. Give the rationale for the choice of cases and controls<br><i>Cross-sectional study</i> —Give the eligibility criteria, and the sources and methods of selection of participants | 4                  |
|                           |        | (b) <i>Cohort study</i> —For matched studies, give matching criteria and number of exposed and unexposed<br><i>Case-control study</i> —For matched studies, give matching criteria and the number of controls per case                                                                                                                                                                                                                                                 |                    |
| Variables                 | 7      | Clearly define all outcomes, exposures, predictors, potential confounders, and effect modifiers. Give diagnostic criteria, if applicable                                                                                                                                                                                                                                                                                                                               | 5                  |
| Data sources/ measurement | 8*     | For each variable of interest, give sources of data and details of methods of assessment (measurement). Describe comparability of assessment methods if there is more than one group                                                                                                                                                                                                                                                                                   | 4-5, Appendix      |
| Bias                      | 9      | Describe any efforts to address potential sources of bias                                                                                                                                                                                                                                                                                                                                                                                                              |                    |
| Study size                | 10     | Explain how the study size was arrived at                                                                                                                                                                                                                                                                                                                                                                                                                              | 4                  |
| Quantitative variables    | 11     | Explain how quantitative variables were handled in the analyses. If applicable, describe which groupings were chosen and why                                                                                                                                                                                                                                                                                                                                           | 5, Appendix        |
| Statistical methods       | 12     | (a) Describe all statistical methods, including those used to control for confounding                                                                                                                                                                                                                                                                                                                                                                                  | 6-7                |
|                           |        | (b) Describe any methods used to examine subgroups and interactions                                                                                                                                                                                                                                                                                                                                                                                                    | 6-7                |
|                           |        | (c) Explain how missing data were addressed                                                                                                                                                                                                                                                                                                                                                                                                                            |                    |
|                           |        | (d) <i>Cohort study</i> —If applicable, explain how loss to follow-up was addressed<br><i>Case-control study</i> —If applicable, explain how matching of cases and controls was addressed                                                                                                                                                                                                                                                                              |                    |

|                          |     |                                                                                                                                                                                                              |                               |
|--------------------------|-----|--------------------------------------------------------------------------------------------------------------------------------------------------------------------------------------------------------------|-------------------------------|
|                          |     | <i>Cross-sectional study</i> —If applicable, describe analytical methods taking account of sampling strategy                                                                                                 | 6-7                           |
|                          |     | (e) Describe any sensitivity analyses                                                                                                                                                                        | 6-7                           |
| <b>Results</b>           |     |                                                                                                                                                                                                              |                               |
| Participants             | 13* | (a) Report numbers of individuals at each stage of study—eg numbers potentially eligible, examined for eligibility, confirmed eligible, included in the study, completing follow-up, and analysed            | 7                             |
|                          |     | (b) Give reasons for non-participation at each stage                                                                                                                                                         | 7, Figure 1                   |
|                          |     | (c) Consider use of a flow diagram                                                                                                                                                                           | 7, Figure 1                   |
| Descriptive data         | 14* | (a) Give characteristics of study participants (eg demographic, clinical, social) and information on exposures and potential confounders                                                                     | 7, Supplemental Table 1 and 2 |
|                          |     | (b) Indicate number of participants with missing data for each variable of interest                                                                                                                          | Figure 1                      |
|                          |     | (c) <i>Cohort study</i> —Summarise follow-up time (eg, average and total amount)                                                                                                                             |                               |
| Outcome data             | 15* | <i>Cohort study</i> —Report numbers of outcome events or summary measures over time                                                                                                                          |                               |
|                          |     | <i>Case-control study</i> —Report numbers in each exposure category, or summary measures of exposure                                                                                                         |                               |
|                          |     | <i>Cross-sectional study</i> —Report numbers of outcome events or summary measures                                                                                                                           | 7-12, Table 1 and 2           |
| Main results             | 16  | (a) Give unadjusted estimates and, if applicable, confounder-adjusted estimates and their precision (eg, 95% confidence interval). Make clear which confounders were adjusted for and why they were included | 7-12, Table 1 and 2           |
|                          |     | (b) Report category boundaries when continuous variables were categorized                                                                                                                                    |                               |
|                          |     | (c) If relevant, consider translating estimates of relative risk into absolute risk for a meaningful time period                                                                                             |                               |
| Other analyses           | 17  | Report other analyses done—eg analyses of subgroups and interactions, and sensitivity analyses                                                                                                               | Supplemental Table 3          |
| <b>Discussion</b>        |     |                                                                                                                                                                                                              |                               |
| Key results              | 18  | Summarise key results with reference to study objectives                                                                                                                                                     | 13-14                         |
| Limitations              | 19  | Discuss limitations of the study, taking into account sources of potential bias or imprecision. Discuss both direction and magnitude of any potential bias                                                   | 15                            |
| Interpretation           | 20  | Give a cautious overall interpretation of results considering objectives, limitations, multiplicity of analyses, results from similar studies, and other relevant evidence                                   | 16                            |
| Generalisability         | 21  | Discuss the generalisability (external validity) of the study results                                                                                                                                        | 15                            |
| <b>Other information</b> |     |                                                                                                                                                                                                              |                               |
| Funding                  | 22  | Give the source of funding and the role of the funders for the present study and, if applicable, for the original study on which the present article is based                                                | 17                            |

\*Give information separately for cases and controls in case-control studies and, if applicable, for exposed and unexposed groups in cohort and cross-sectional studies.

1  
2 **Note:** An Explanation and Elaboration article discusses each checklist item and gives methodological background and published examples of transparent reporting. The STROBE  
3 checklist is best used in conjunction with this article (freely available on the Web sites of PLoS Medicine at <http://www.plosmedicine.org/>, Annals of Internal Medicine at  
4 <http://www.annals.org/>, and Epidemiology at <http://www.epidem.com/>). Information on the STROBE Initiative is available at [www.strobe-statement.org](http://www.strobe-statement.org).  
5  
6  
7  
8  
9  
10  
11  
12  
13  
14  
15  
16  
17  
18  
19  
20  
21  
22  
23  
24  
25  
26  
27  
28  
29  
30  
31  
32  
33  
34  
35  
36  
37  
38  
39  
40  
41  
42  
43  
44  
45  
46

For peer review only
