# Supplementary material for: Clinical and biological determinants of P-wave duration: cross-sectional data from the population-based CoLaus|PsyCoLaus study
Source: PubMed Central journal article supplement — BMJ Open. 2020 Nov 19;10(11):e038828. doi: 10.1136/bmjopen-2020-038828 (PMC7678386; doi:10.1136/bmjopen-2020-038828), 2020-11-19
Supplement: bmjopen-2020-038828supp001.pdf [file bmjopen-2020-038828supp001.pdf]

## APPENDIX

**Anthropometric measures and blood pressure measures are described in this Appendix. It also includes a description of the methods used to determine the biological values. A specific set of references is provided for this Appendix.**

Body weight and height were measured with participants standing without shoes in light indoor clothing. Weight was measured in kilograms to the nearest 0.1 kg using a Seca™ scale (Seca, Hamburg, Germany). Height was measured to the nearest 5 mm using a Seca™ height gauge (Seca, Hamburg, Germany). Body mass index (BMI) was defined as weight (kg)/height<sup>2</sup> (m<sup>2</sup>). Obesity was defined as BMI ≥ 30 kg/m<sup>2</sup>, overweight as BMI ≥ 25 and < 30 kg/m<sup>2</sup>, normal as BMI ≥ 18.5 and < 25 kg/m<sup>2</sup> and underweight as BMI < 18.5 kg/m<sup>2</sup>. Due to the small number of underweight participants (n=55), they were included in the normal category.

Waist circumference was measured mid-way between the lowest rib and the iliac crest and abdominal obesity was defined as waist circumference > 102 cm or > 88 cm for men and women respectively.(1)

Blood pressure (BP) was measured thrice on the left arm after at least 10 minutes rest in the seated position using a clinically validated automated oscillometric device (Omron® HEM-907, Matsusaka, Japan) with a standard cuff, or a large cuff if arm circumference was ≥ 33 cm. The average of the last two measurements was used. Hypertension was defined as mean systolic BP (SBP) ≥ 140 mmHg and/or a mean diastolic BP (DBP) ≥ 90 mmHg and/or use of anti-hypertensive medication.

Venous blood samples (50 mL) were drawn in the fasting state. All biological assays were performed at the clinical laboratory of the Lausanne University Hospital within 2 hours of blood collection on fresh samples. Glycated haemoglobin (HbA1c) was measured by high performance liquid chromatography (Bio-Rad, D-10™). Subjects were considered to have diabetes if they had a serum HbA1c ≥ 6.5% (≥48 nmol/mmol) and/or were taking anti-diabetic treatment.

Total cholesterol was measured by CHOD-PAP; HDL-cholesterol by CHOD-PAP + PEG + cyclodextrin; triglycerides by GPO-PAP. In our analysis, dyslipidemia was defined as triglycerides  $\geq 2$  mmol/l and/or LDL  $\geq 3$  mmol/l and/or lipid lowering treatment.

High sensitivity CRP was assessed by immunoassay (HS latex) and was considered elevated when  $\geq 5$  mg/l. Serum and urinary creatinine were performed by the Jaffe kinetic compensated method. Renal failure was considered when eGFR was  $< 60$  ml/min/1.73m<sup>2</sup> using CKD-EPI formula. Troponine T hs and NT-proBNP were measured by electrochemiluminescence and considered elevated when  $\geq 14$  ng/l and 125 ng/l respectively. Biological threshold were defined based on the standard values in our clinical laboratory (Lausanne University Hospital). Since the threshold value for a positive NT-proBNP result usually increased with age, we only considered the lowest threshold value available in our laboratory (i.e. 125 ng/l), as a simple, more sensitive approach to the potential effect of this variable.

The metabolic syndrome was retained in presence of any 3 out of 5 risk factors on the basis of the JIS (Joint Interim Statement) definition. The criteria for clinical diagnosis are: elevated waist circumference ( $\geq 102$  cm for men and  $\geq 88$  cm for women), elevated triglycerides ( $\geq 1.7$  mmol/l), reduced HDL-C ( $< 1.0$  mmol/l for men and  $< 1.3$  mmol/l for women), elevated BP (systolic BP  $\geq 130$  mm Hg and/or diastolic BP  $\geq 85$  mm Hg), elevated fasting glucose ( $\geq 5.6$  mmol/l).(2)

**Supplemental Table 1.** Complete baseline characteristics of the study population, CoLaus|PsyColaus study, Lausanne, Switzerland, 2014-2016.

|                            | Included    | Excluded    | P-value |
|----------------------------|-------------|-------------|---------|
| <b>All</b>                 | 3459        | 1422        |         |
| Age in years (mean; SD)    | 62 ±10      | 65 ±11      | <0.001  |
| Gender                     |             |             |         |
| Men                        | 1543 (44.6) | 649 (45.6)  |         |
| Women                      | 1916 (55.4) | 773 (54.4)  |         |
| Race/ethnicity             |             |             |         |
| Caucasian                  | 3202 (92.6) | 1313 (92.3) |         |
| Other                      | 257 (7.4)   | 109 (7.7)   |         |
| BMI categories             |             |             | 0.005   |
| Normal                     | 1405 (40.6) | 452 (44.2)  |         |
| Overweight                 | 1415 (40.9) | 360 (35.2)  |         |
| Obese                      | 639 (18.5)  | 210 (20.6)  |         |
| Abdominal obesity          | 1298 (37.5) | 395 (38.5)  | 0.562   |
| Smoking                    |             |             | 0.952   |
| Never                      | 1455 (42.1) | 431 (41.6)  |         |
| Former                     | 1349 (39.0) | 405 (39.1)  |         |
| Current                    | 655 (18.9)  | 200 (19.3)  |         |
| Alcohol use                |             |             | <0.001  |
| Non drinker                | 908 (26.3)  | 267 (34.2)  |         |
| Low risk                   | 2076 (60.0) | 412 (52.8)  |         |
| Medium risk                | 386 (11.2)  | 87 (11.1)   |         |
| High risk                  | 89 (2.6)    | 15 (1.9)    |         |
| Personal history of CVD    | 309 (8.9)   | 209 (14.7)  | <0.001  |
| Family history of CVD      | 1344 (38.9) | 421 (29.6)  | <0.001  |
| Hypertension               | 1544 (44.6) | 719 (58.6)  | <0.001  |
| Dyslipidaemia              | 2444 (70.7) | 1064 (74.8) | 0.003   |
| Diabetes                   | 294 (8.5)   | 188 (17.1)  | <0.001  |
| Metabolic syndrome         | 955 (27.6)  | 304 (30.6)  | 0.065   |
| Renal failure              | 373 (10.8)  | 163 (15.5)  | <0.001  |
| Antidepressant medications | 35 (1.0)    | 15 (1.1)    | 0.892   |
| Troponin T > 14 ng/l       | 226 (8.9)   | 156 (19.3)  | <0.001  |
| CRP ≥ 5 mg/L               | 285 (8.2)   | 111 (15.0)  | <0.001  |
| NT-proBNP > 125 pg/ml      | 702 (32.6)  | 365 (51.3)  | <0.001  |

*SD, standard deviation; BMI, body mass index; CVD, cardiovascular disease; CRP, C-reactive protein. Please refer to the methods and Appendix for the definition of each characteristic. In column excluded, totals might not add to 1422 due to missing data. Results are expressed as mean ± standard deviation for continuous variables and as number of participants (column percentage) for*

*categorical variables. Between-group comparisons performed using t-test for continuous variables and chi-square for categorical variables.*

**Supplemental Table 2.** Characteristics of participants with P-wave duration < 120 and ≥ 120 ms, CoLaus|PsyColaus study, Lausanne, Switzerland, 2014-2016.

|                            | PWD < 120 ms | PWD ≥ 120 ms | P-value |
|----------------------------|--------------|--------------|---------|
| <b>All</b>                 | 2718         | 741          |         |
| Age in years (mean; SD)    | 61 ± 9.6     | 65.5 ± 10.2  | <0.001  |
| Gender                     |              |              | <0.001  |
| Men                        | 1110 (40.8)  | 433 (58.4)   |         |
| Women                      | 1608 (59.2)  | 308 (41.6)   |         |
| Race/ethnicity             |              |              | 0.017   |
| Caucasian                  | 2501 (92.0)  | 701 (94.6)   |         |
| Other                      | 217 (8.0)    | 40 (5.4)     |         |
| BMI categories             |              |              | <0.001  |
| Normal                     | 1157 (42.6)  | 248 (33.5)   |         |
| Overweight                 | 1106 (40.7)  | 309 (41.7)   |         |
| Obese                      | 455 (16.7)   | 184 (24.8)   |         |
| Abdominal obesity          | 960 (35.3)   | 338 (45.6)   | <0.001  |
| Smoking                    |              |              | 0.005   |
| Never                      | 1159 (42.6)  | 296 (40)     |         |
| Former                     | 1024 (37.7)  | 325 (43.9)   |         |
| Current                    | 535 (19.7)   | 120 (16.2)   |         |
| Alcohol use                |              |              | 0.146   |
| Non drinker                | 719 (26.5)   | 189 (25.5)   |         |
| Low risk                   | 1645 (60.5)  | 431 (58.2)   |         |
| Medium risk                | 288 (10.6)   | 98 (13.2)    |         |
| High risk                  | 66 (2.4)     | 23 (3.1)     |         |
| Personal history of CVD    | 210 (7.7)    | 99 (13.4)    | <0.001  |
| Family history of CVD      | 1061 (39.0)  | 283 (38.2)   | 0.676   |
| Hypertension               | 1121 (41.2)  | 423 (57.1)   | <0.001  |
| Dyslipidaemia              | 1899 (69.9)  | 545 (73.6)   | 0.051   |
| Diabetes                   | 213 (7.9)    | 81 (11.0)    | 0.007   |
| Metabolic syndrome         | 691 (25.4)   | 264 (35.6)   | <0.001  |
| Renal failure              | 267 (9.8)    | 106 (14.3)   | <0.001  |
| Antidepressant medications | 27 (1.0)     | 8 (1.1)      | 0.835   |
| Troponin T > 14 ng/l       | 140 (7.4)    | 86 (13.3)    | <0.001  |
| CRP ≥ 5 mg/L               | 219 (8.1)    | 66 (8.9)     | 0.456   |
| NT-proBNP > 125 pg/ml      | 493 (29.4)   | 209 (44.0)   | <0.001  |

PWD, P-wave duration; ms, milliseconds; SD, standard deviation; BMI, body mass index; CVD; cardiovascular disease; CRP, C-reactive protein. Please refer to the methods and Appendix for the definition of each characteristic. Results are expressed as mean ± standard deviation or as number of participants (column percentage). Between-group comparisons performed using student t-test or chi-square.

**Supplemental Table 3.** Multivariable associations between P-wave duration and different demographic, clinical and biological markers, CoLaus|PsyColaus study, Lausanne, Switzerland, 2014-2016. Only computer-evaluated ECGs.

| Characteristics         | Model 1     | P-value | Model 2A           | P-value | Model 2B           | P-value |
|-------------------------|-------------|---------|--------------------|---------|--------------------|---------|
| Age (continuous)        | -           |         | 0.29 (0.25 - 0.34) | <0.001  | 0.28 (0.24 - 0.33) | <0.001  |
| Height (continuous)     | -           |         | 0.27 (0.20 - 0.33) | <0.001  | 0.24 (0.18 - 0.30) | <0.001  |
| Gender                  |             |         |                    | <0.001  |                    | <0.001  |
| Woman                   | -           |         | 110.6 ± 0.3        |         | 110.3 ± 0.3        |         |
| Man                     | -           |         | 112.5 ± 0.4        |         | 112.9 ± 0.4        |         |
| BMI categories          |             | <0.001  |                    | <0.001  |                    |         |
| Normal                  | 110.3 ± 0.3 |         | 110.5 ± 0.3        |         |                    |         |
| Overweight              | 111.7 ± 0.3 |         | 111.7 ± 0.3        |         |                    |         |
| Obese                   | 113.2 ± 0.5 |         | 113.0 ± 0.5        |         |                    |         |
| Abdominal obesity       |             | <0.001  |                    |         |                    | <0.001  |
| No                      | 110.8 ± 0.3 |         |                    |         | 110.9 ± 0.3        |         |
| Yes                     | 112.6 ± 0.3 |         |                    |         | 112.4 ± 0.4        |         |
| Smoking                 |             | 0.716   |                    |         |                    |         |
| Never                   | 111.6 ± 0.3 |         | -                  |         | -                  |         |
| Former                  | 111.5 ± 0.3 |         | -                  |         | -                  |         |
| Current                 | 111.1 ± 0.5 |         | -                  |         | -                  |         |
| Alcohol use             |             | 0.875   |                    |         |                    |         |
| Non drinker             | 111.3 ± 0.4 |         | -                  |         | -                  |         |
| Low risk                | 111.4 ± 0.3 |         | -                  |         | -                  |         |
| Medium risk             | 111.9 ± 0.6 |         | -                  |         | -                  |         |
| High risk               | 111.4 ± 1.3 |         | -                  |         | -                  |         |
| Personal history of CVD |             | 0.632   |                    |         |                    |         |
| No                      | 111.5 ± 0.2 |         | -                  |         | -                  |         |

|                     |             |        |             |       |             |       |
|---------------------|-------------|--------|-------------|-------|-------------|-------|
| Yes                 | 111.1 ± 0.7 |        | -           |       | -           |       |
| Hypertension        |             | <0.001 |             | 0.011 |             | 0.004 |
| No                  | 110.7 ± 0.3 |        | 110.9 ± 0.3 |       | 110.8 ± 0.3 |       |
| Yes                 | 112.4 ± 0.3 |        | 112.1 ± 0.3 |       | 112.2 ± 0.3 |       |
| Dyslipidaemia       |             | 0.243  |             |       |             |       |
| No                  | 111.1 ± 0.4 |        | -           |       | -           |       |
| Yes                 | 111.6 ± 0.2 |        | -           |       | -           |       |
| Diabetes            |             | 0.146  |             |       |             |       |
| No                  | 111.5 ± 0.2 |        | -           |       | -           |       |
| Yes                 | 110.4 ± 0.7 |        | -           |       | -           |       |
| Metabolic syndrome  |             | 0.064  |             |       |             |       |
| No                  | 111.2 ± 0.2 |        | -           |       | -           |       |
| Yes                 | 112.1 ± 0.4 |        | -           |       | -           |       |
| Renal failure       |             | 0.732  |             |       |             |       |
| No                  | 111.5 ± 0.2 |        | -           |       | -           |       |
| Yes                 | 111.2 ± 0.7 |        | -           |       | -           |       |
| Troponin ≥14 ng/L   |             | 0.707  |             |       |             |       |
| No                  | 112.8 ± 0.3 |        | -           |       | -           |       |
| Yes                 | 112.5 ± 0.9 |        | -           |       | -           |       |
| NT-proBNP ≥125 ng/L |             | 0.933  |             |       |             |       |
| No                  | 111.2 ± 0.3 |        | -           |       | -           |       |
| Yes                 | 111.3 ± 0.5 |        | -           |       | -           |       |

-, not included in the model. BMI, Body Mass Index; CVD, cardiovascular disease. Please refer to the methods and Appendix for the definition of each characteristic. Results are expressed as adjusted coefficient (95% confidence interval) for continuous variables and as mean ± standard error for categorical variables. Model 1: adjusted for age (continuous), height (continuous) and gender. Full model (2A and 2B): including all variables indicated.

## REFERENCES

1. National Cholesterol Education Program (NCEP) Expert Panel on Detection E, and Treatment of High Blood Cholesterol in Adults (Adult Treatment Panel III. Third Report of the National Cholesterol Education Program (NCEP) Expert Panel on Detection, Evaluation, and Treatment of High Blood Cholesterol in Adults (Adult Treatment Panel III) final report. *Circulation* 2002;106:3143-3421.
2. Alberti KG, Eckel RH, Grundy SM et al. Harmonizing the metabolic syndrome: a joint interim statement of the International Diabetes Federation Task Force on Epidemiology and Prevention; National Heart, Lung, and Blood Institute; American Heart Association; World Heart Federation; International Atherosclerosis Society; and International Association for the Study of Obesity. *Circulation* 2009;120:1640-1645.
