# Supplementary material for: Clinical and biological determinants of P-wave duration: cross-sectional data from the population-based CoLaus|PsyCoLaus study
Source: PubMed Central journal article supplement — BMJ Open. 2020 Nov 19;10(11):e038828. doi: 10.1136/bmjopen-2020-038828 (PMC7678386; doi:10.1136/bmjopen-2020-038828), 2020-11-19
Supplement: bmjopen-2020-038828supp002.pdf [file bmjopen-2020-038828supp002.pdf]

## Supplemental Figure 1

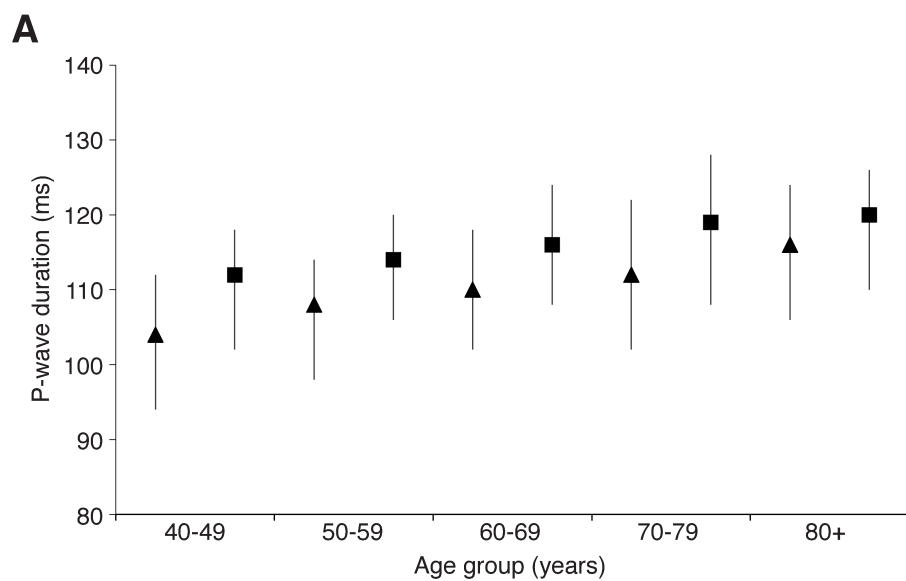

**Supplemental Figure 1.** Mean P-wave duration values of males and females by age. ms, milliseconds. Squares represent men and triangles represent women.
